# Supplementary material for: Synthesis of methyl 3-amino-3,6-dideoxy-α-d-galactopyranoside carrying different amide substituents
Source: Royal Society of Chemistry journal article supplement (doi:10.1039/c3ra45092a), 2013-01-01

## **Synthesis of methyl 3-amino-3,6-dideoxy- $\alpha$ -D-galactopyranoside carrying different amide substituents**

Hani Mobarak, Olof Engström and Göran Widmalm\*

Department of Organic Chemistry, Arrhenius Laboratory,  
Stockholm University, S-106 91 Stockholm, Sweden

\*Corresponding author. E-mail: gw@organ.su.se

Supporting Information

$^1\text{H}$  and  $^{13}\text{C}$  NMR spectra of compounds **1** – **21** ..... S1 – S42

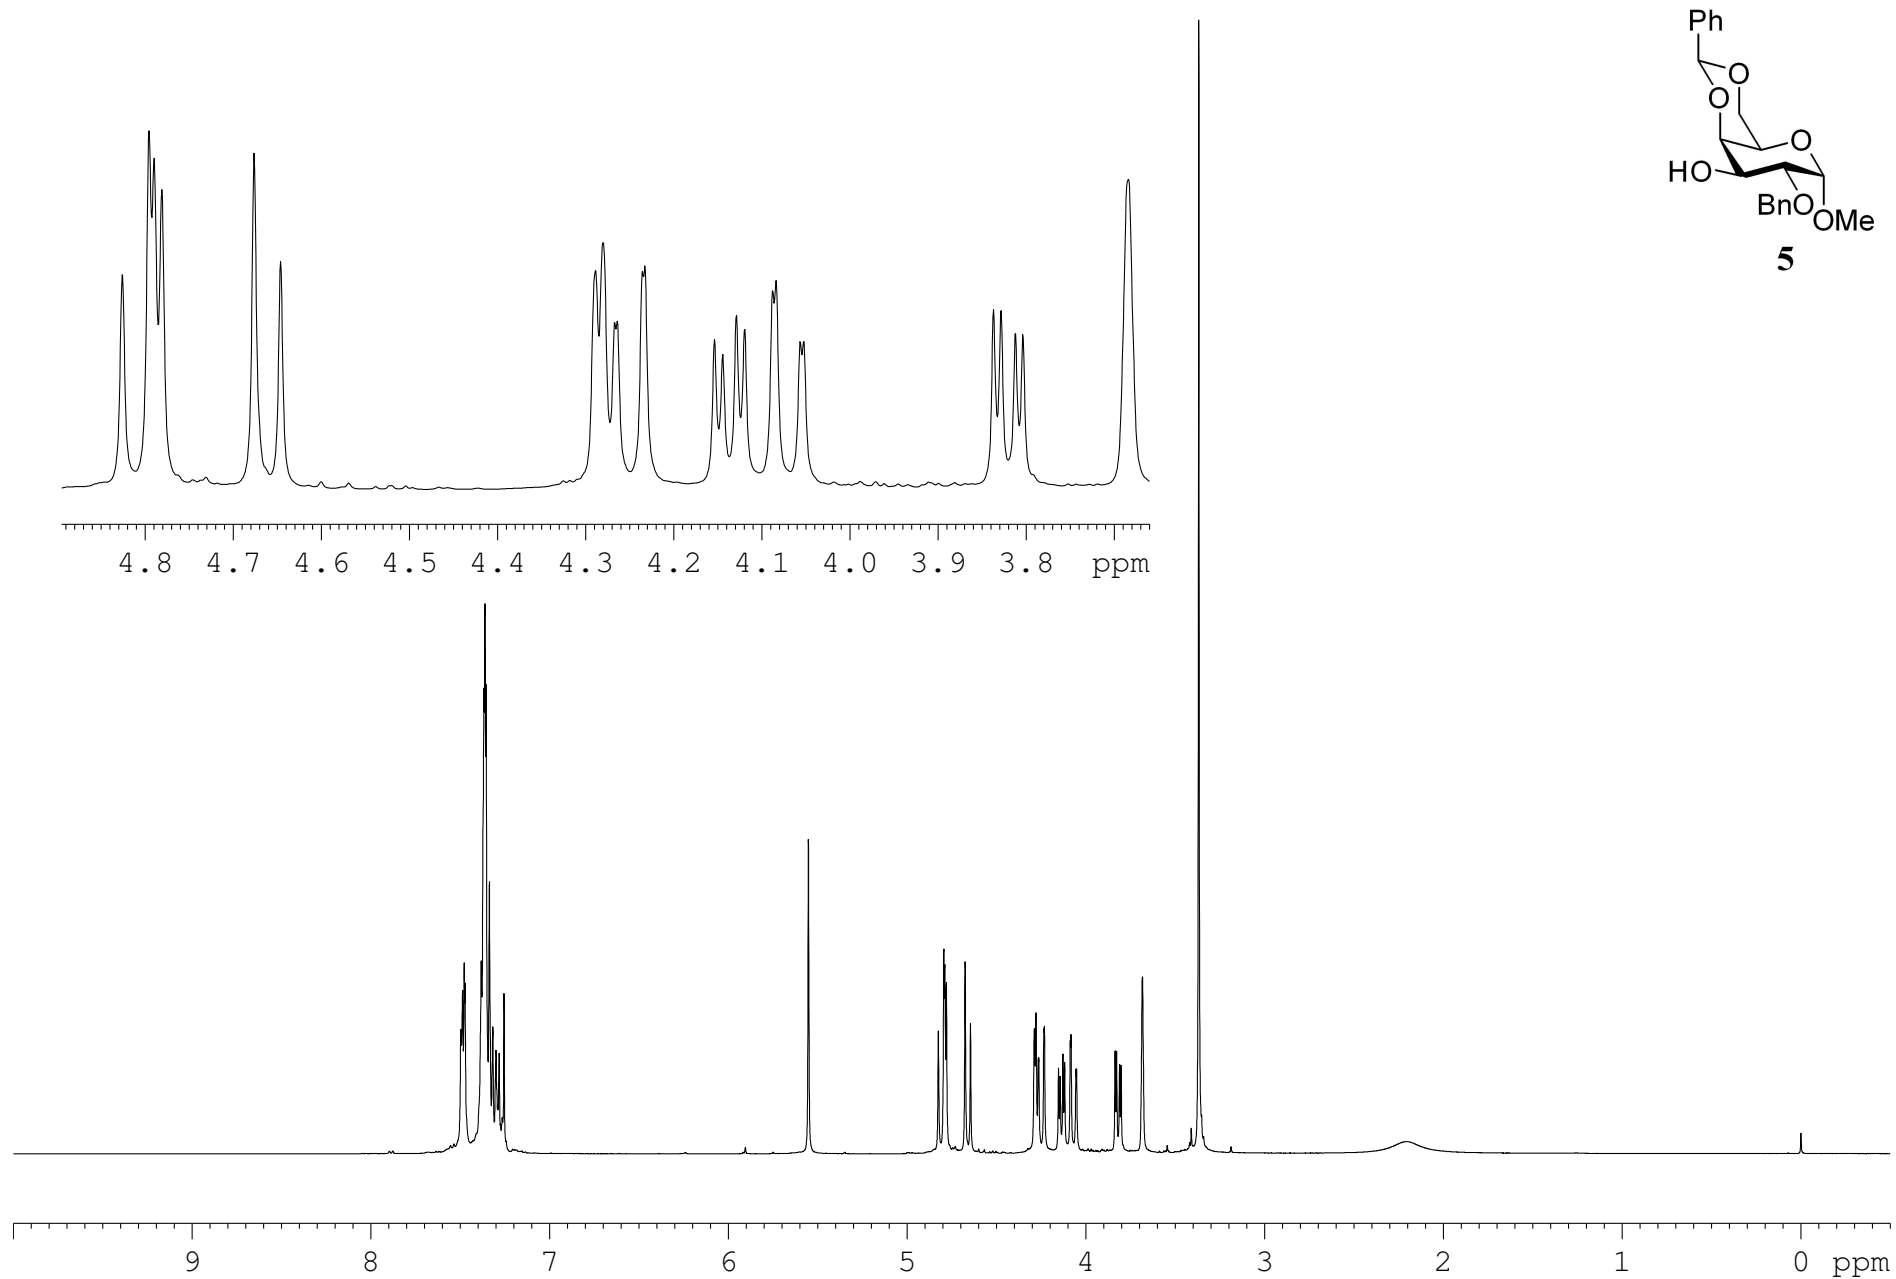

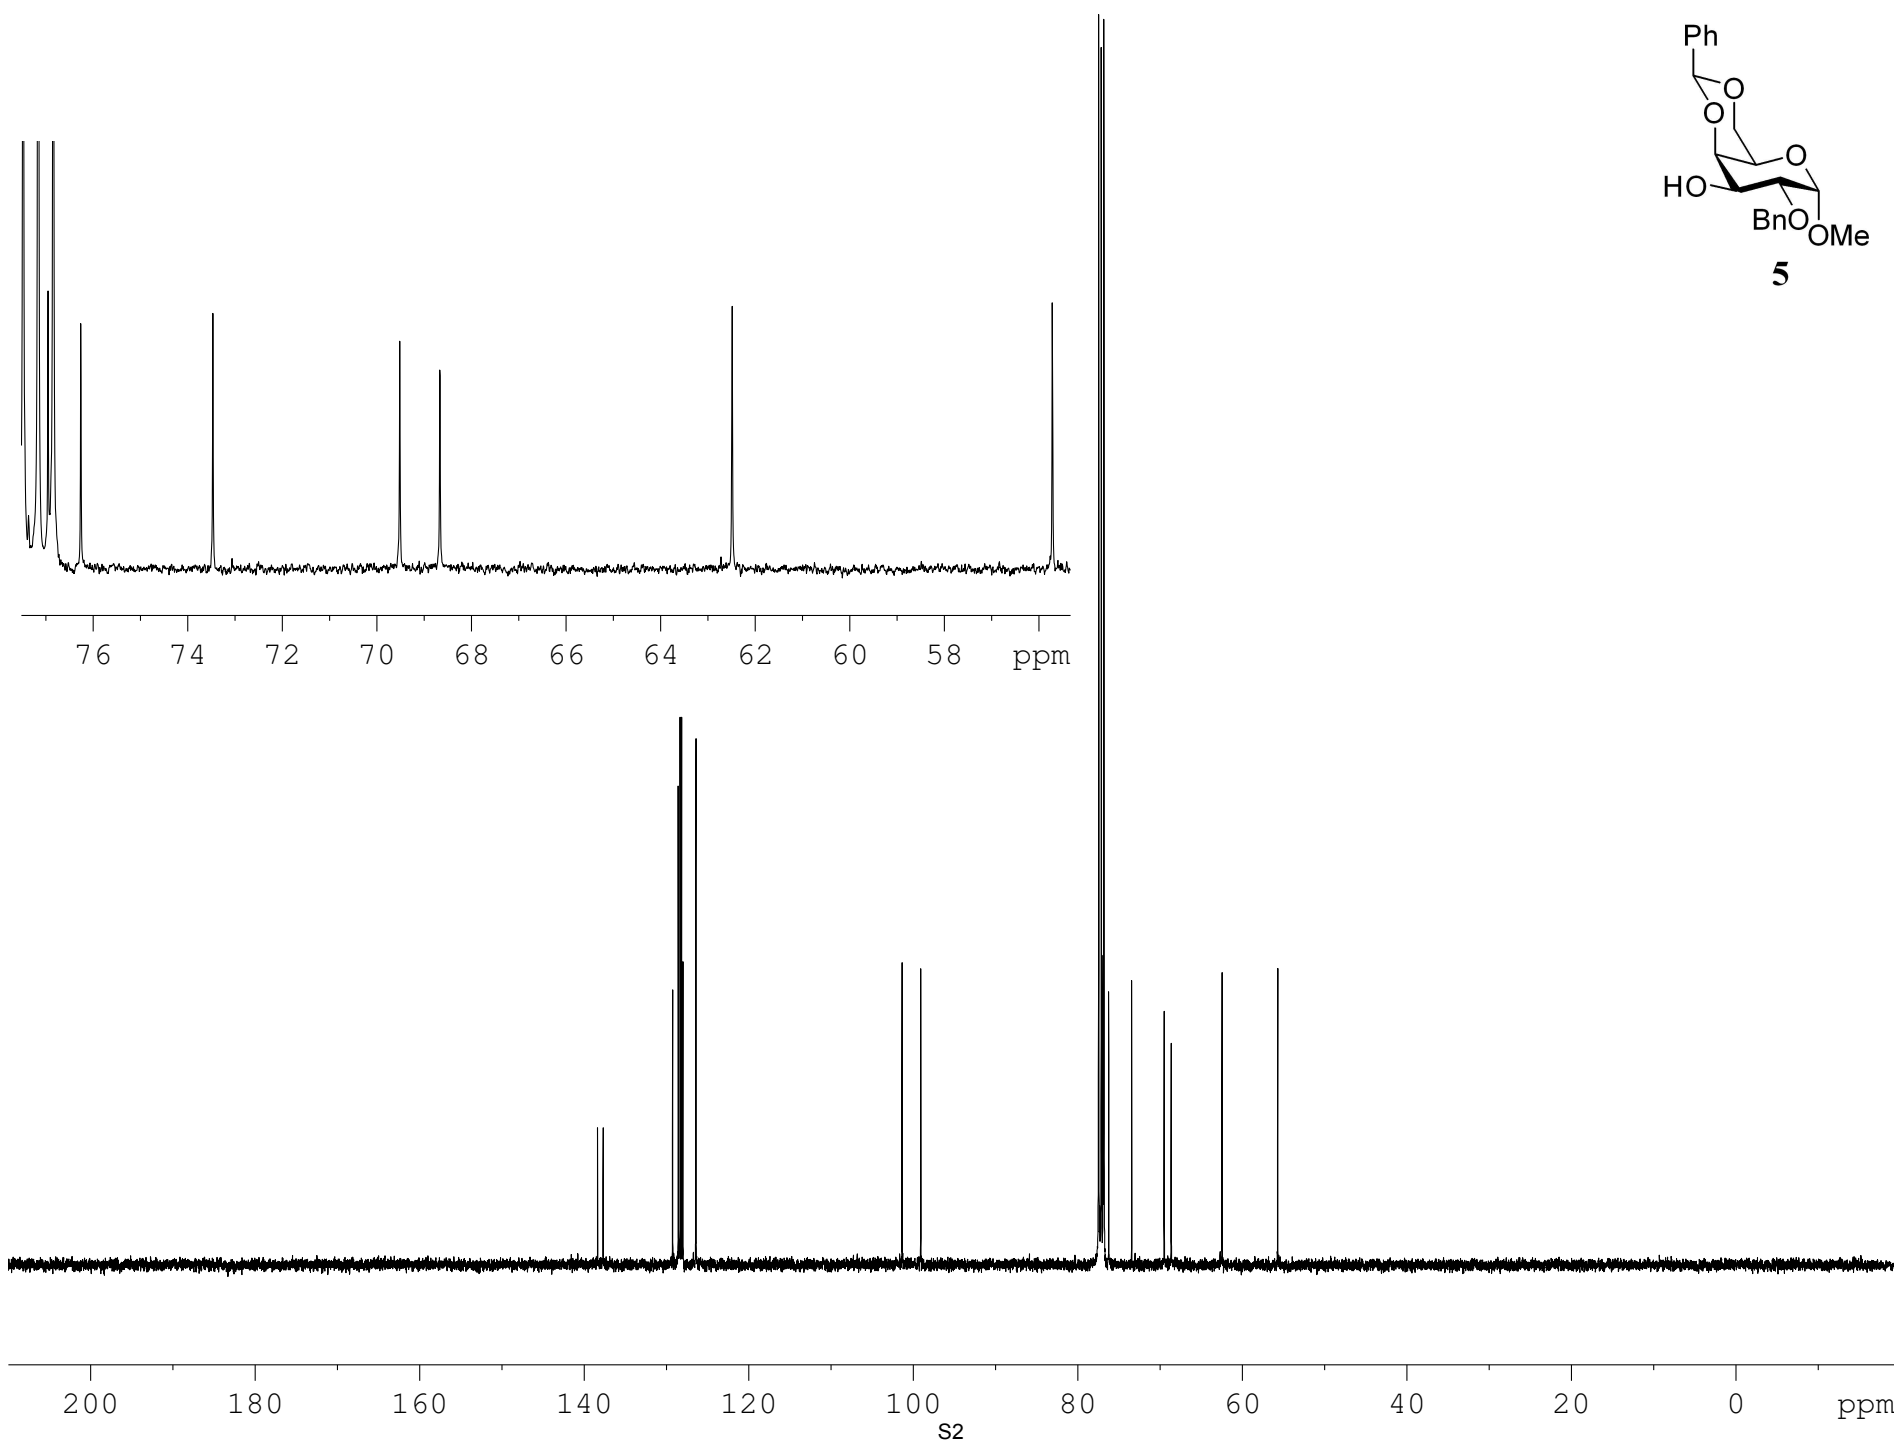

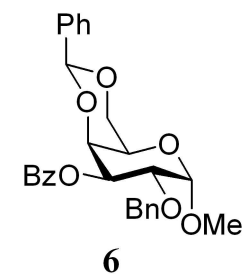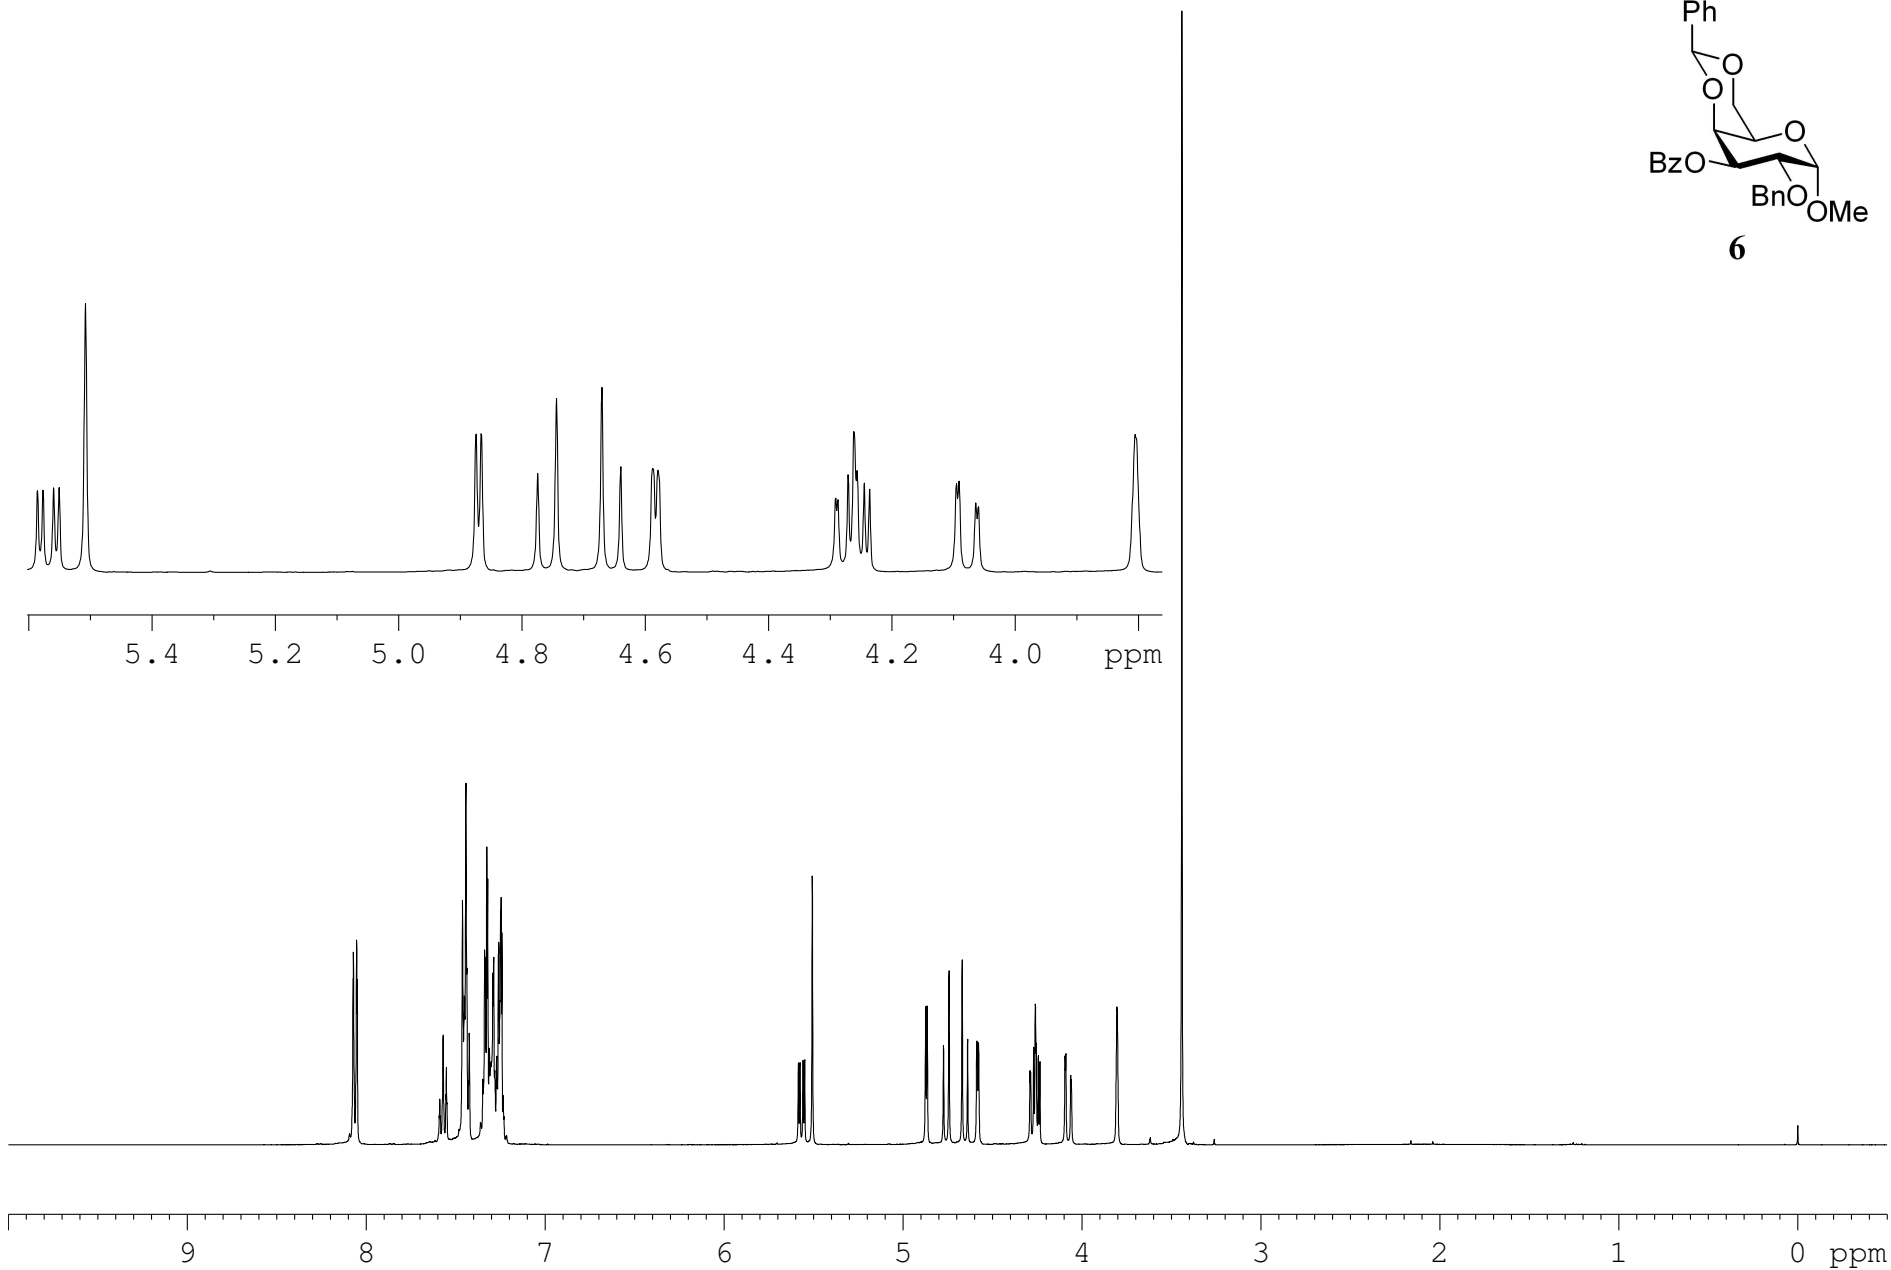

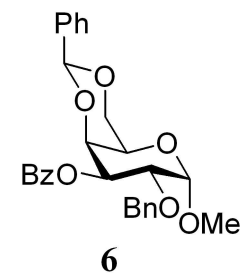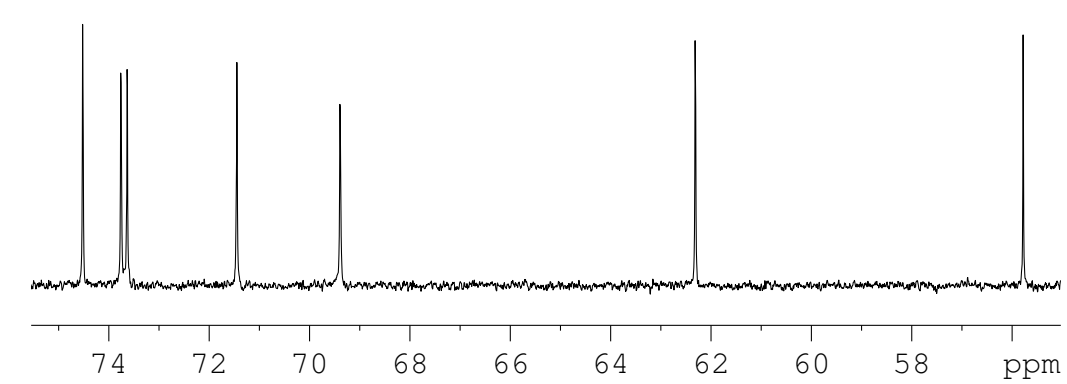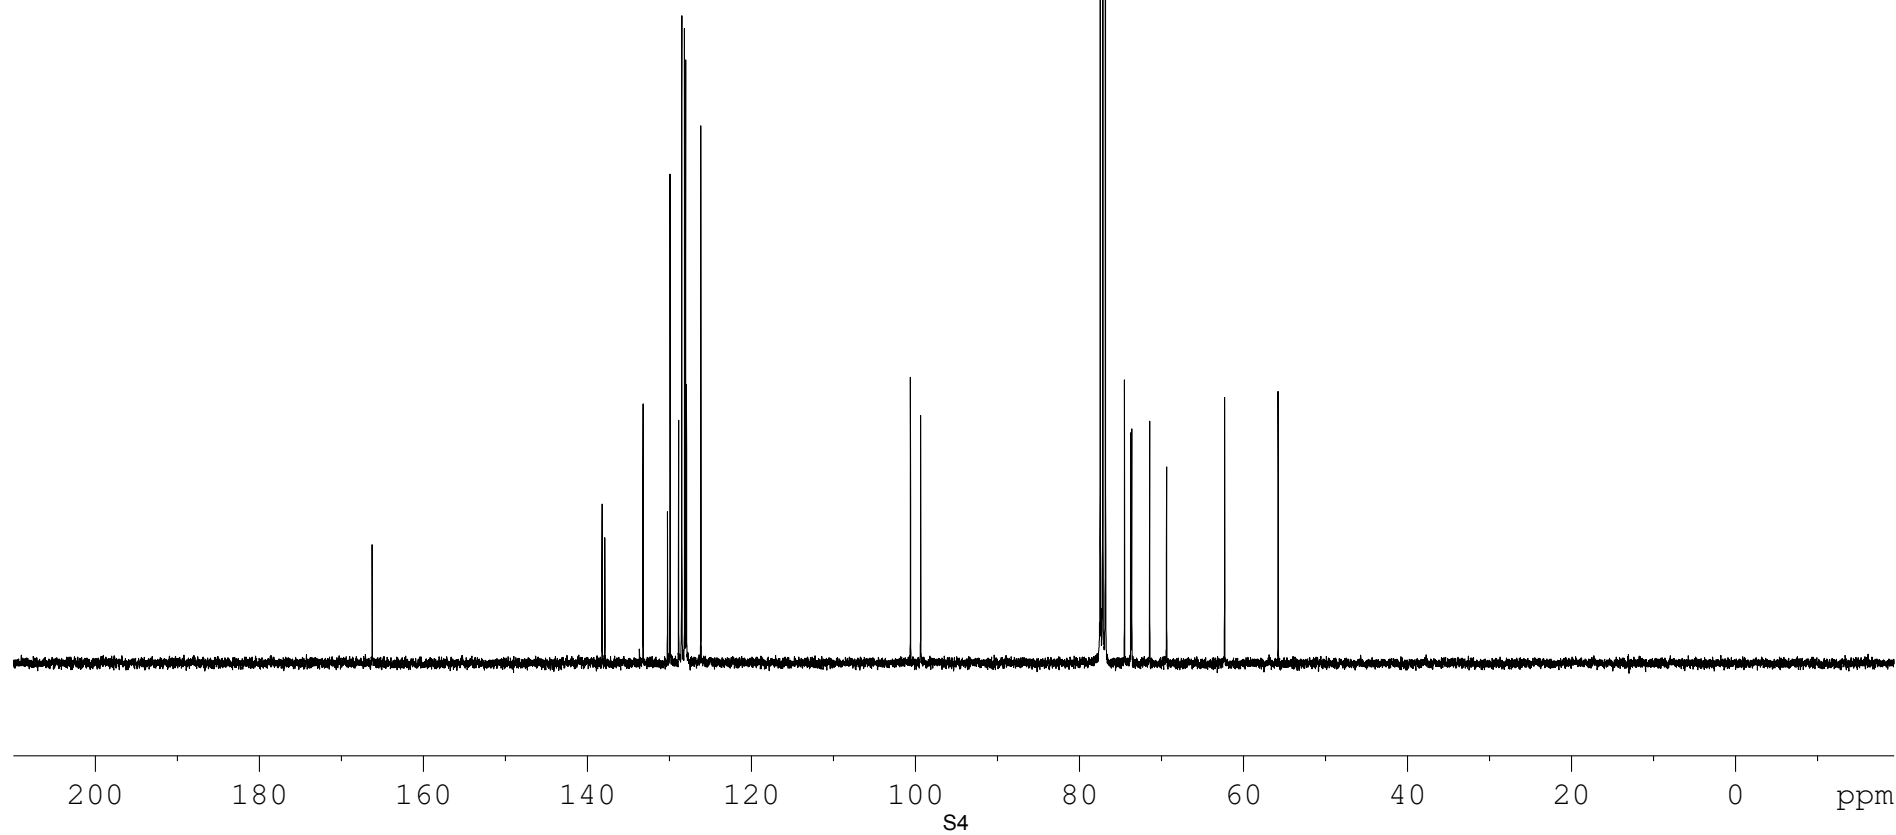

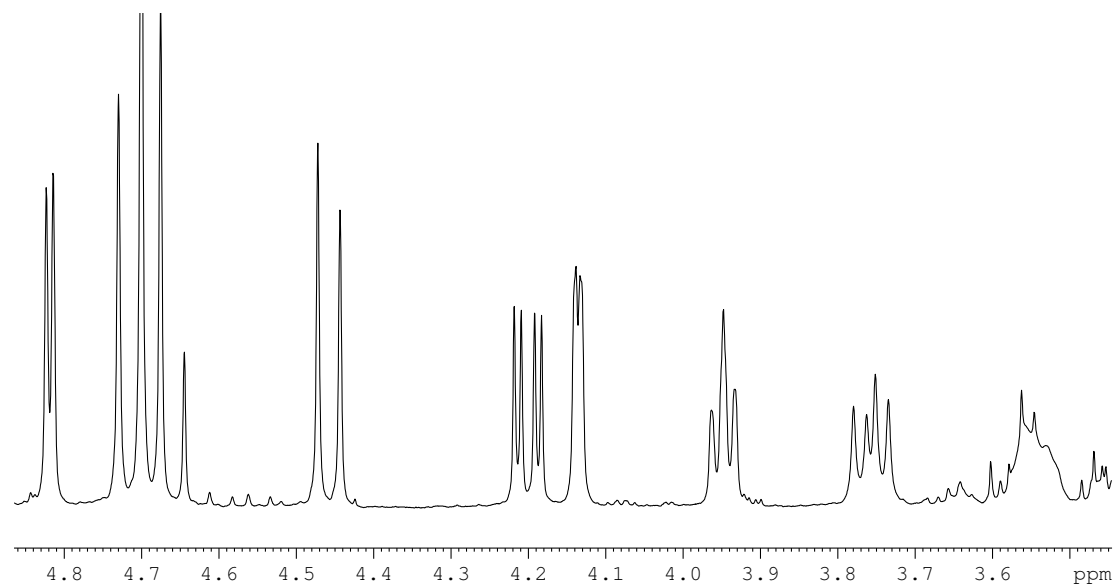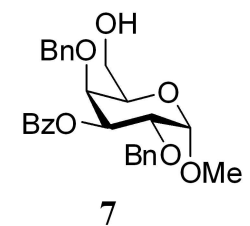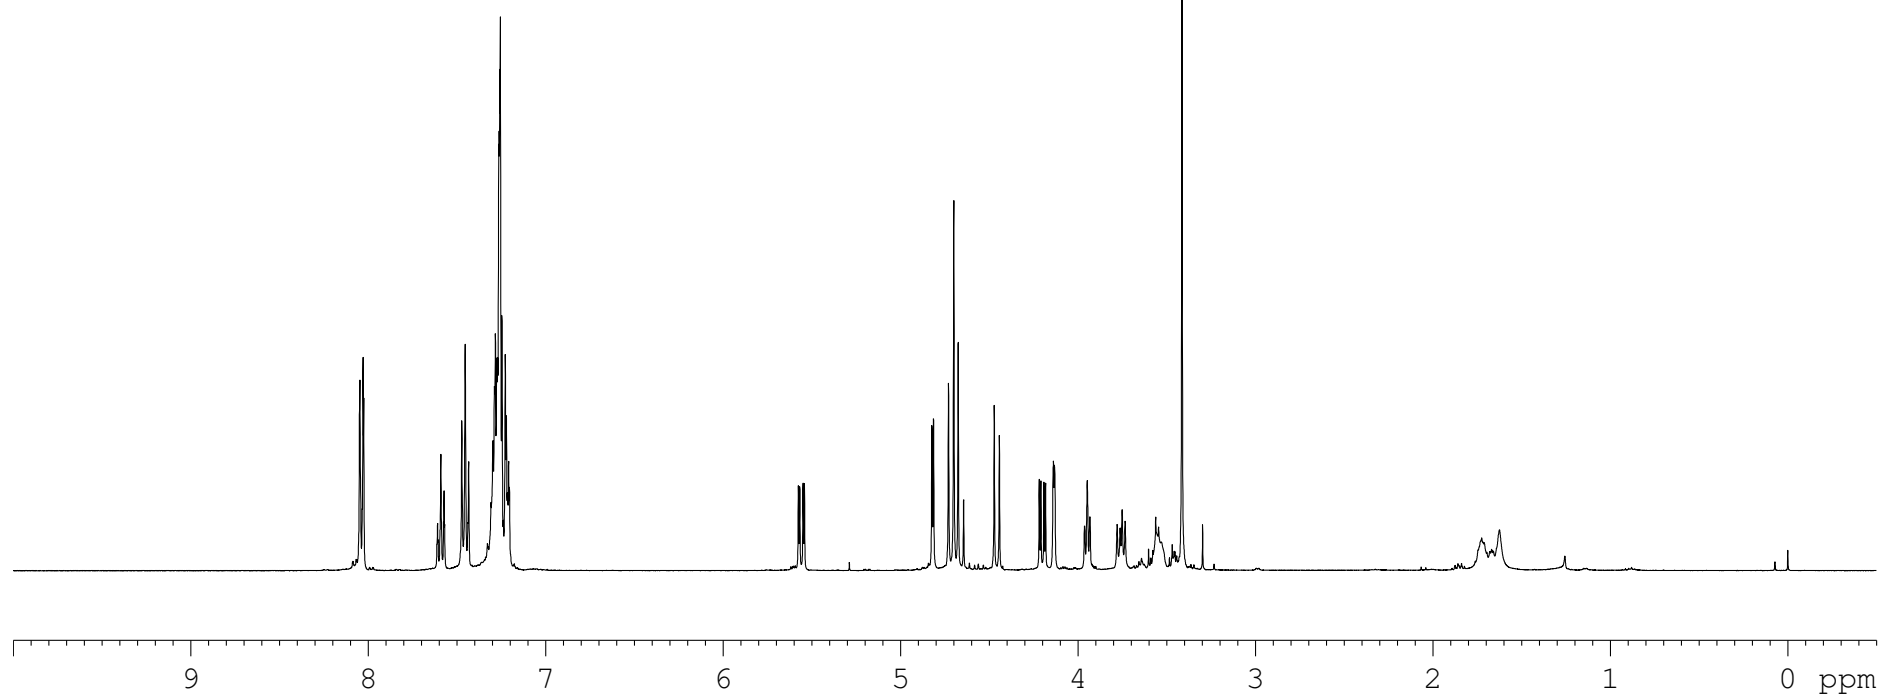

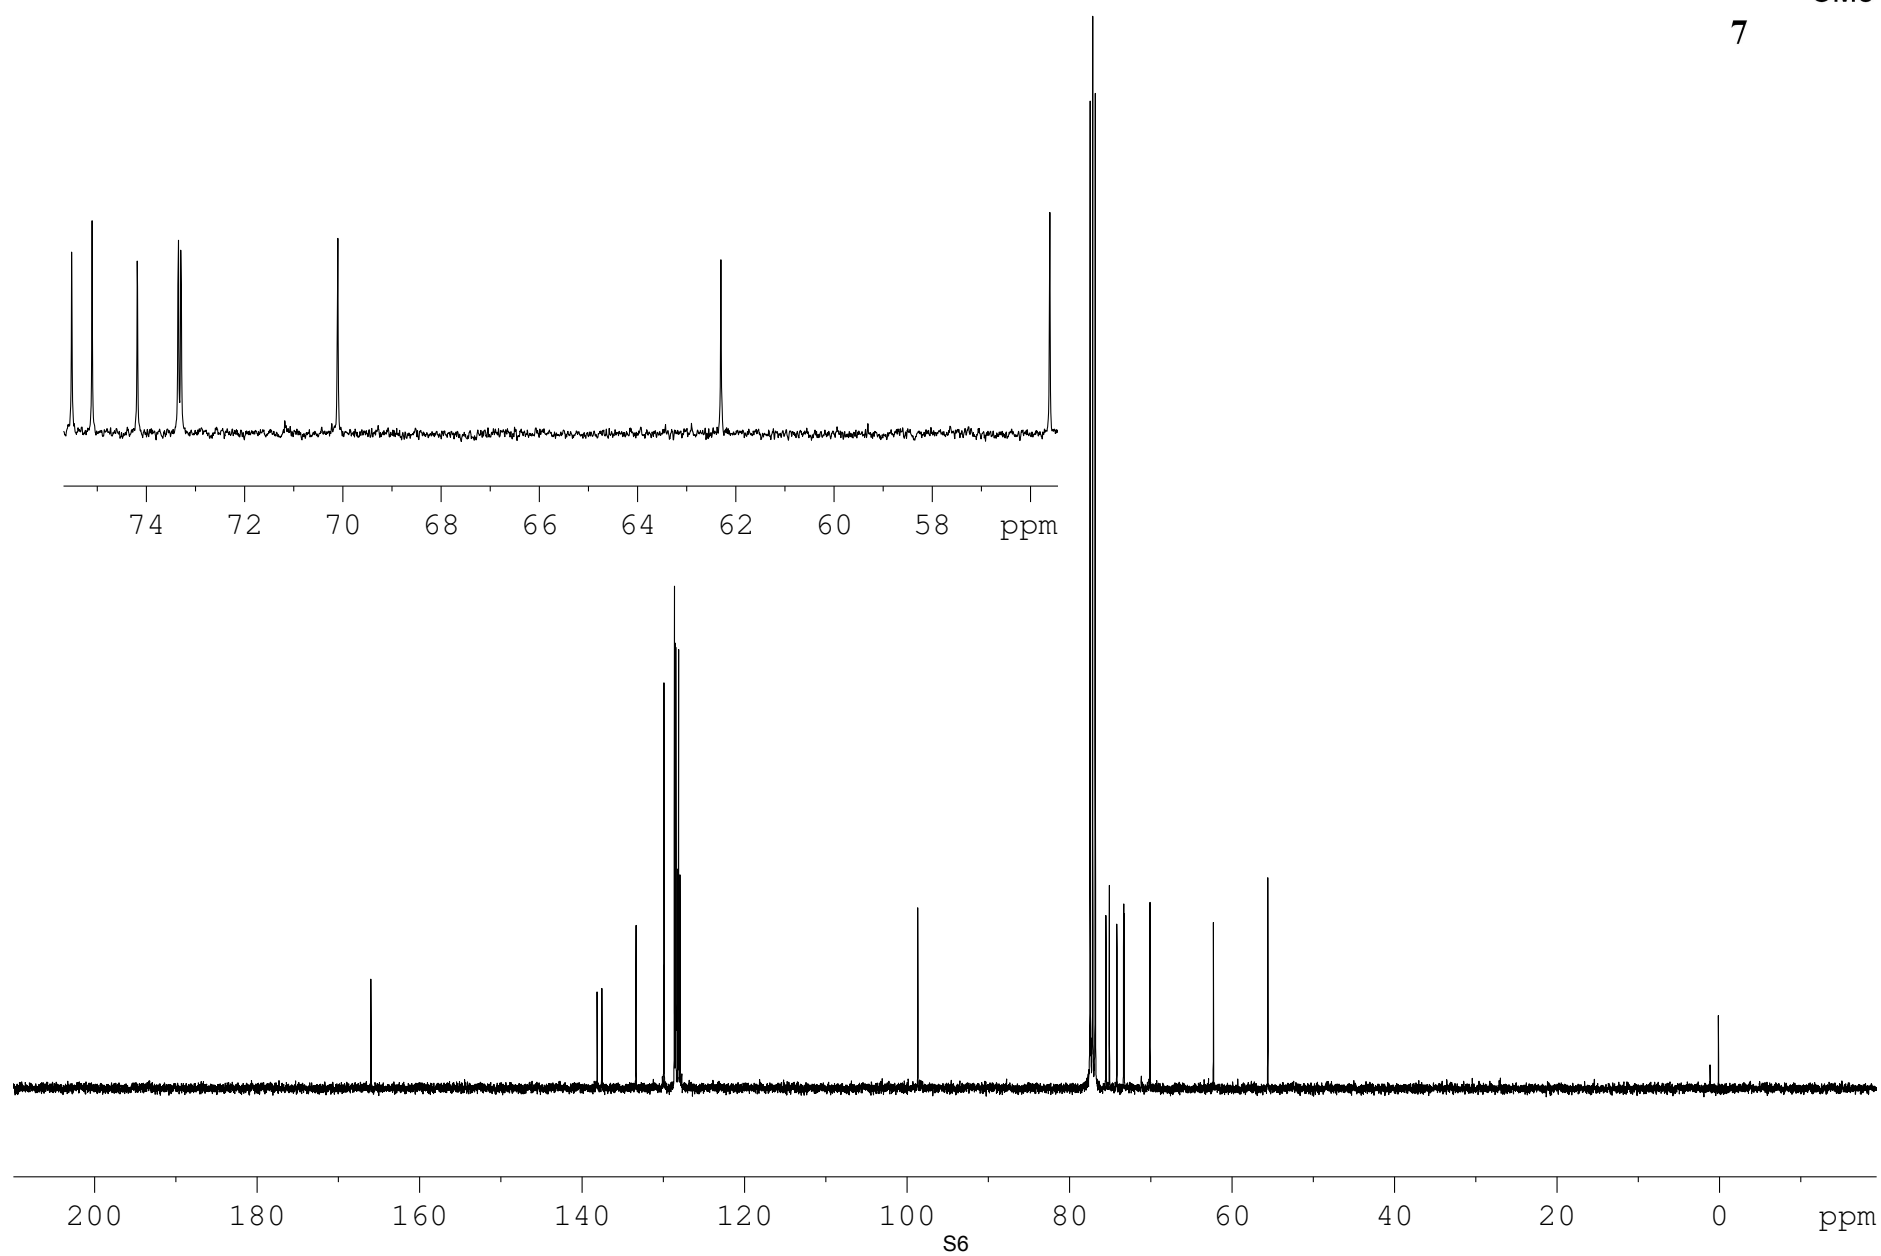

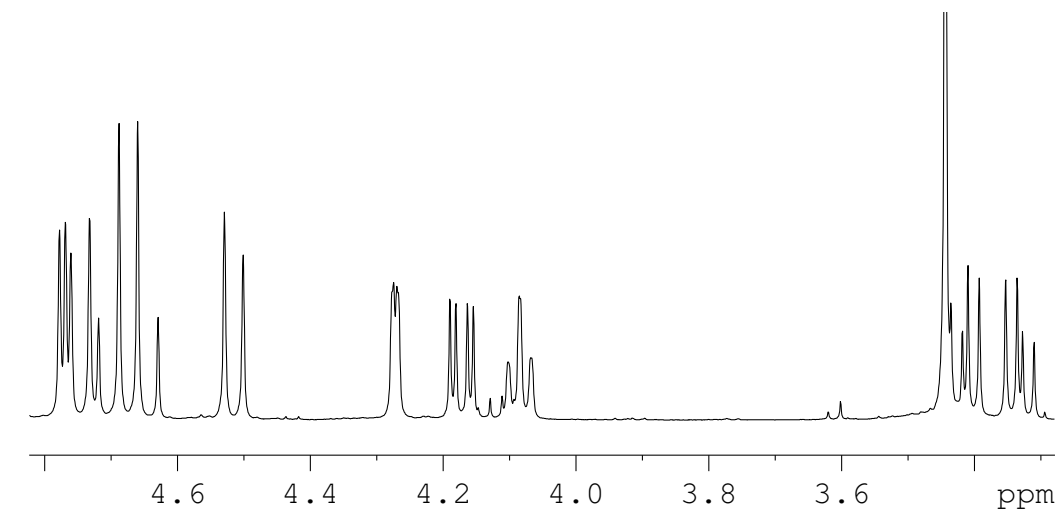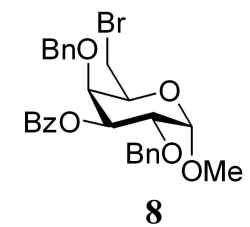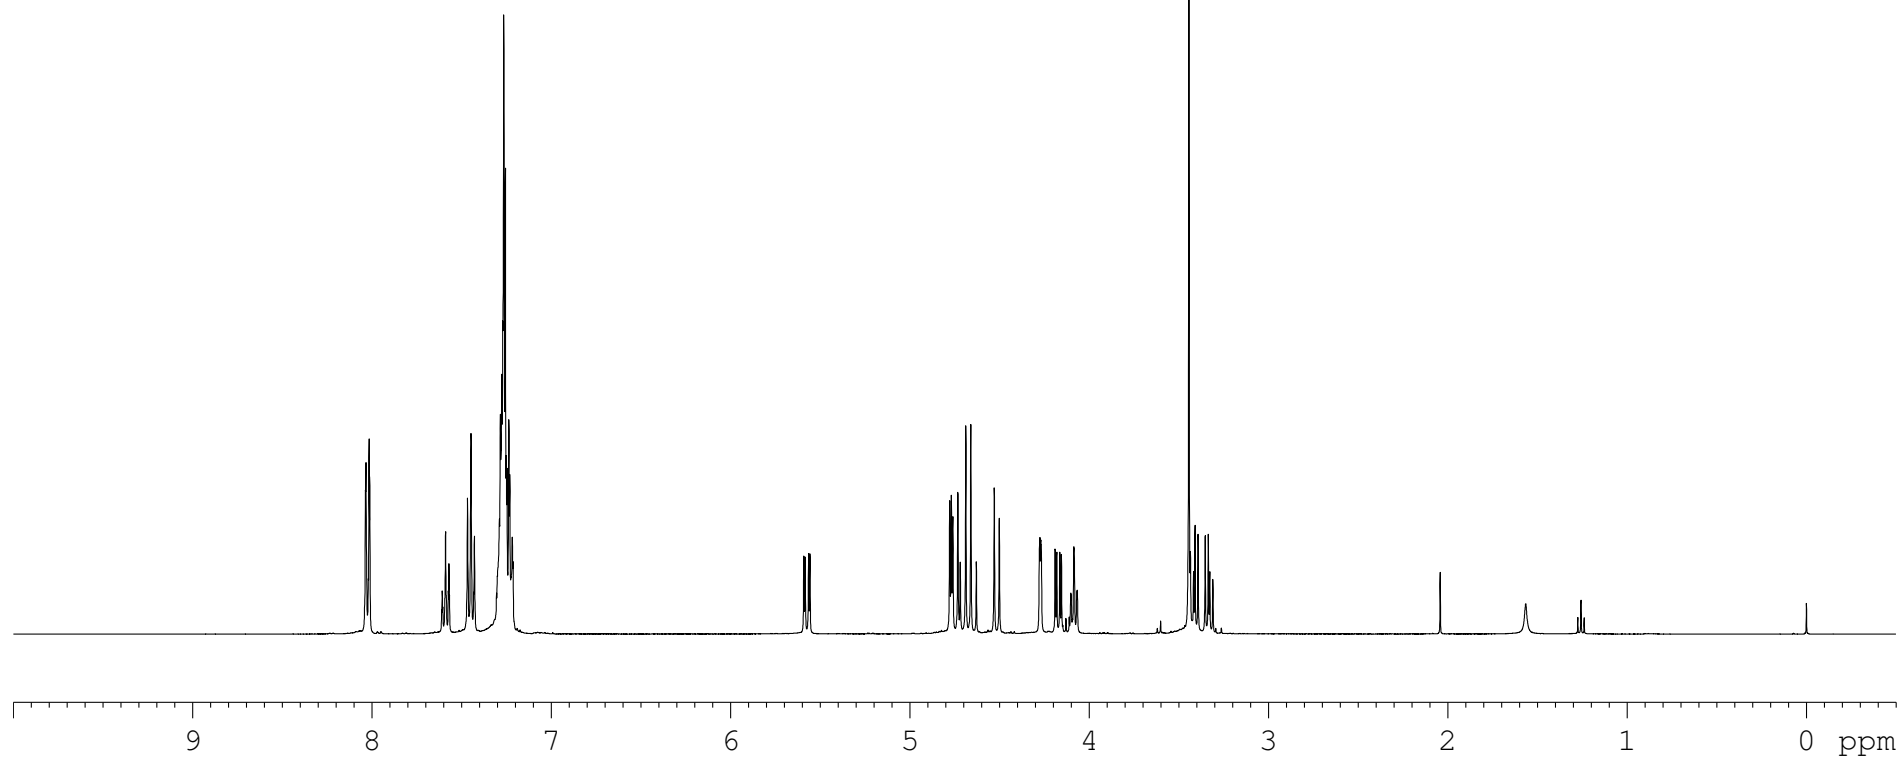



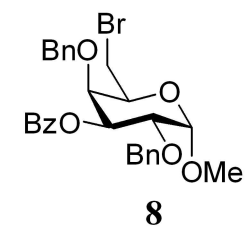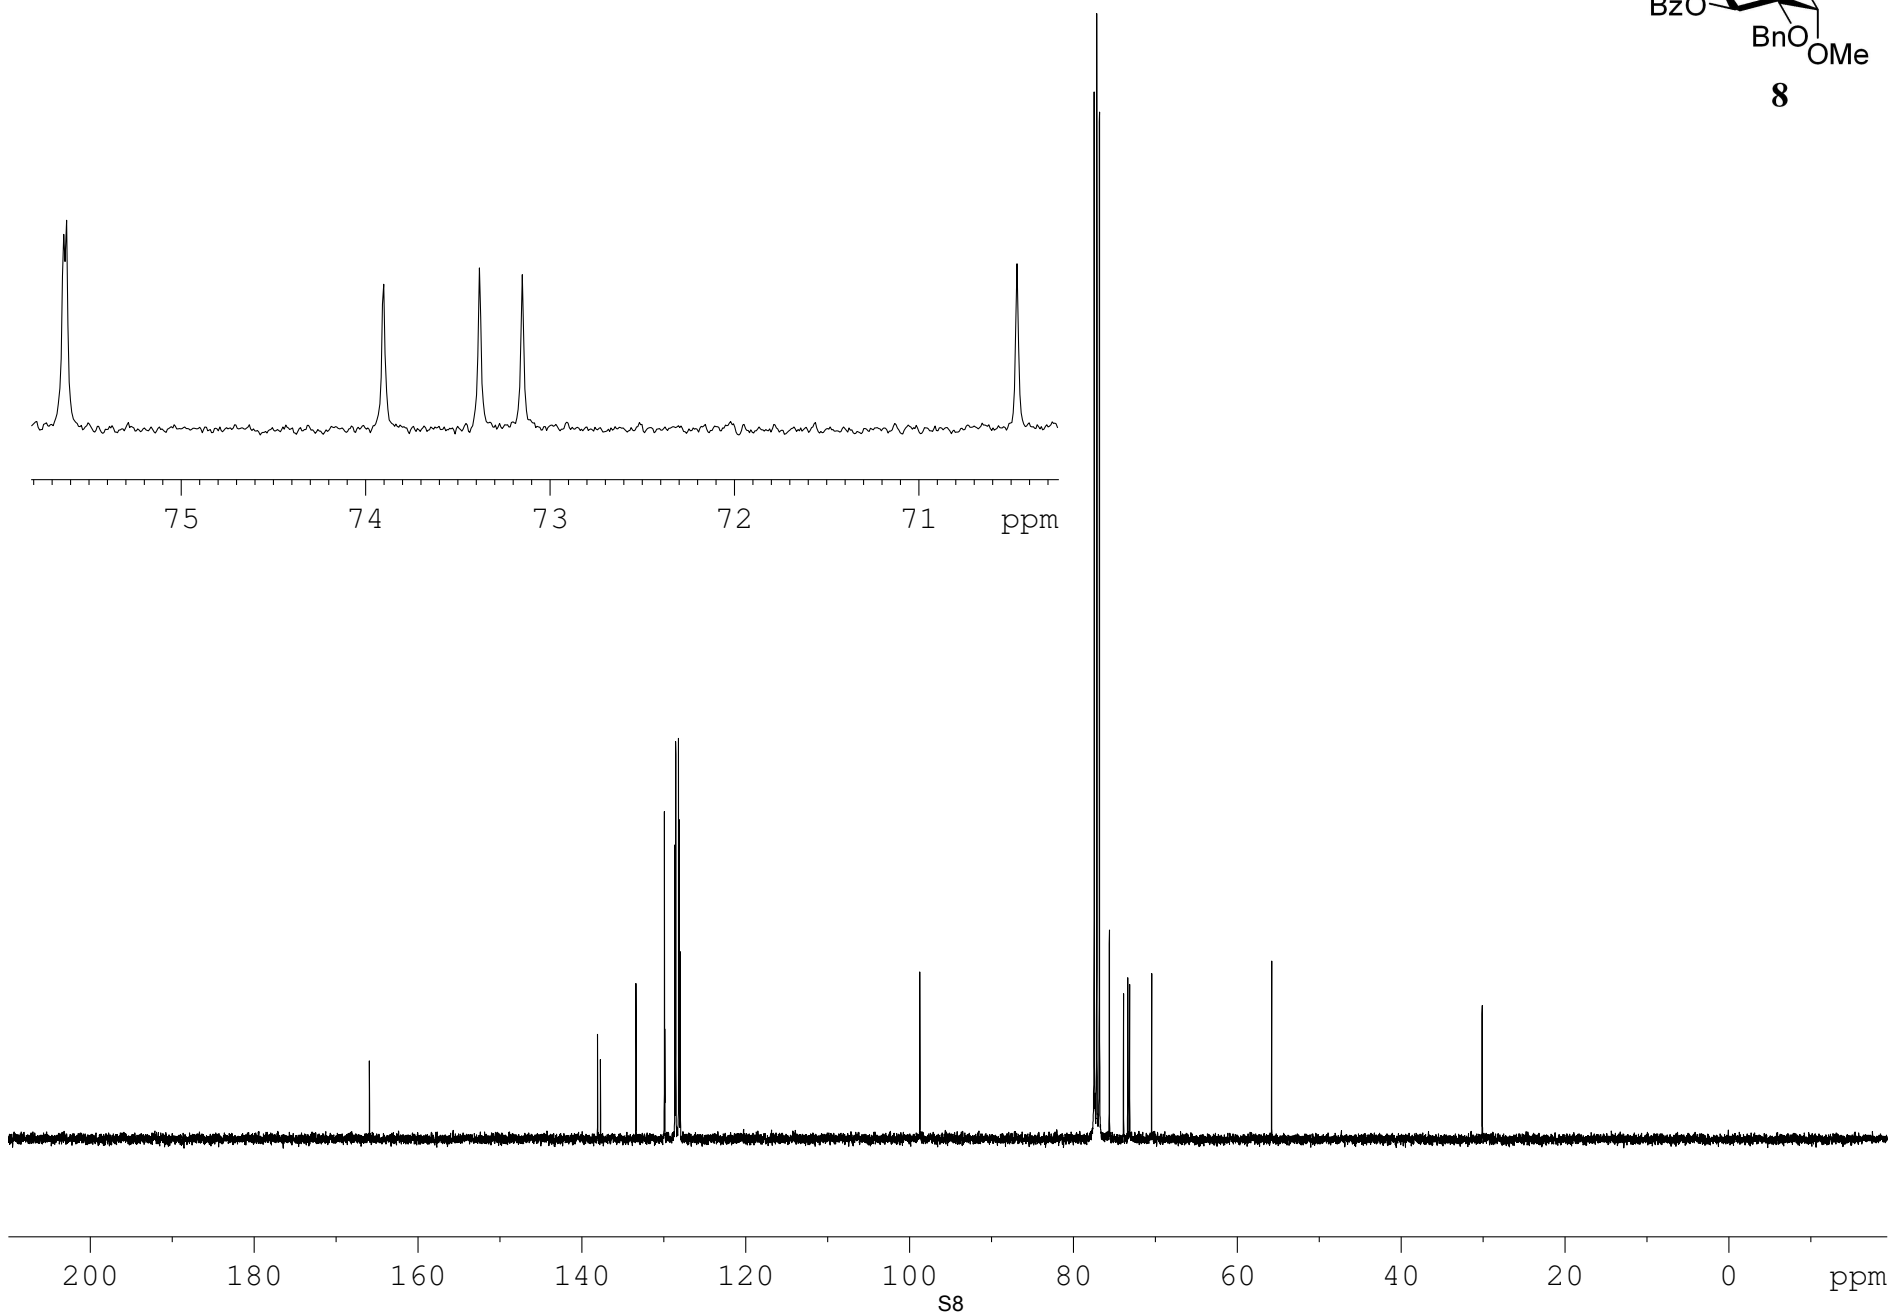

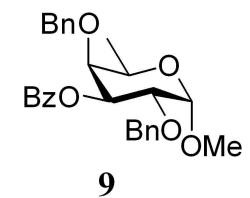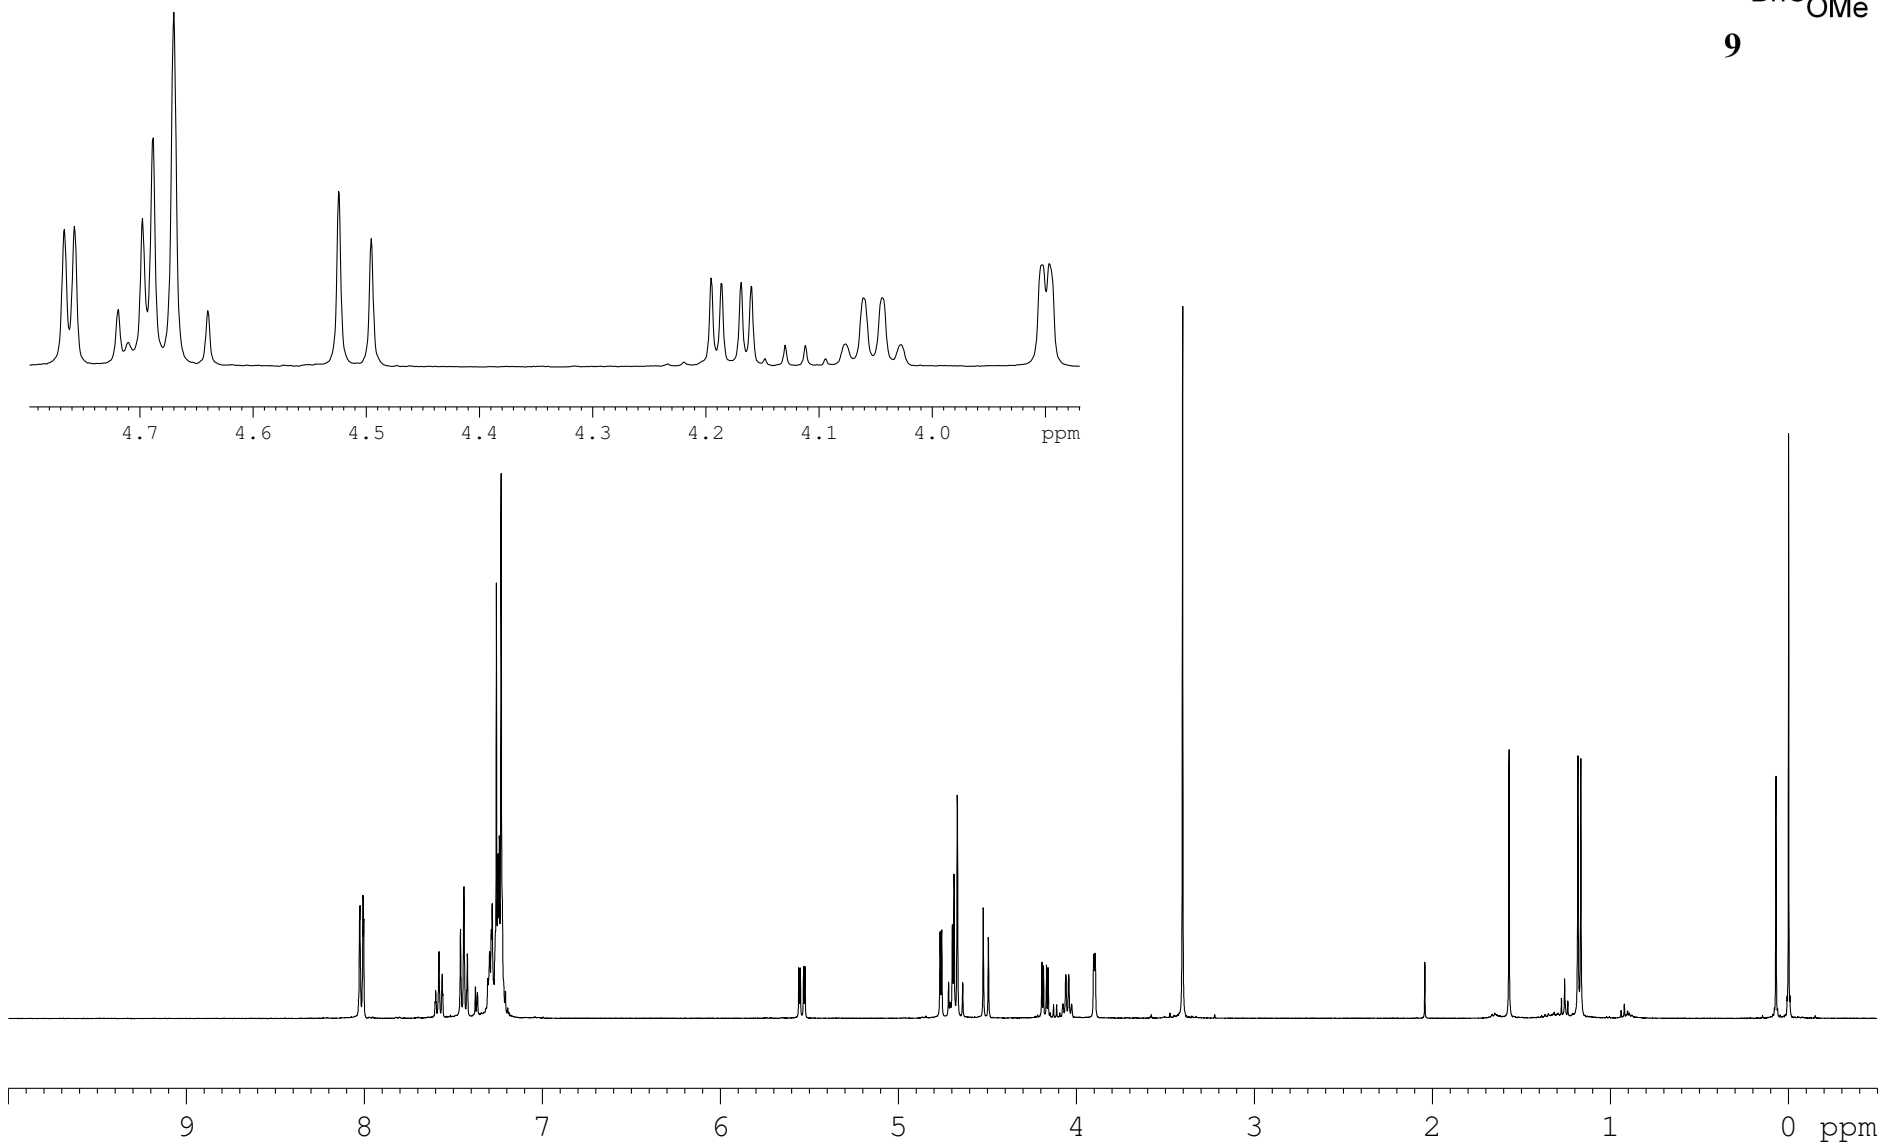

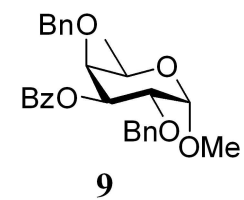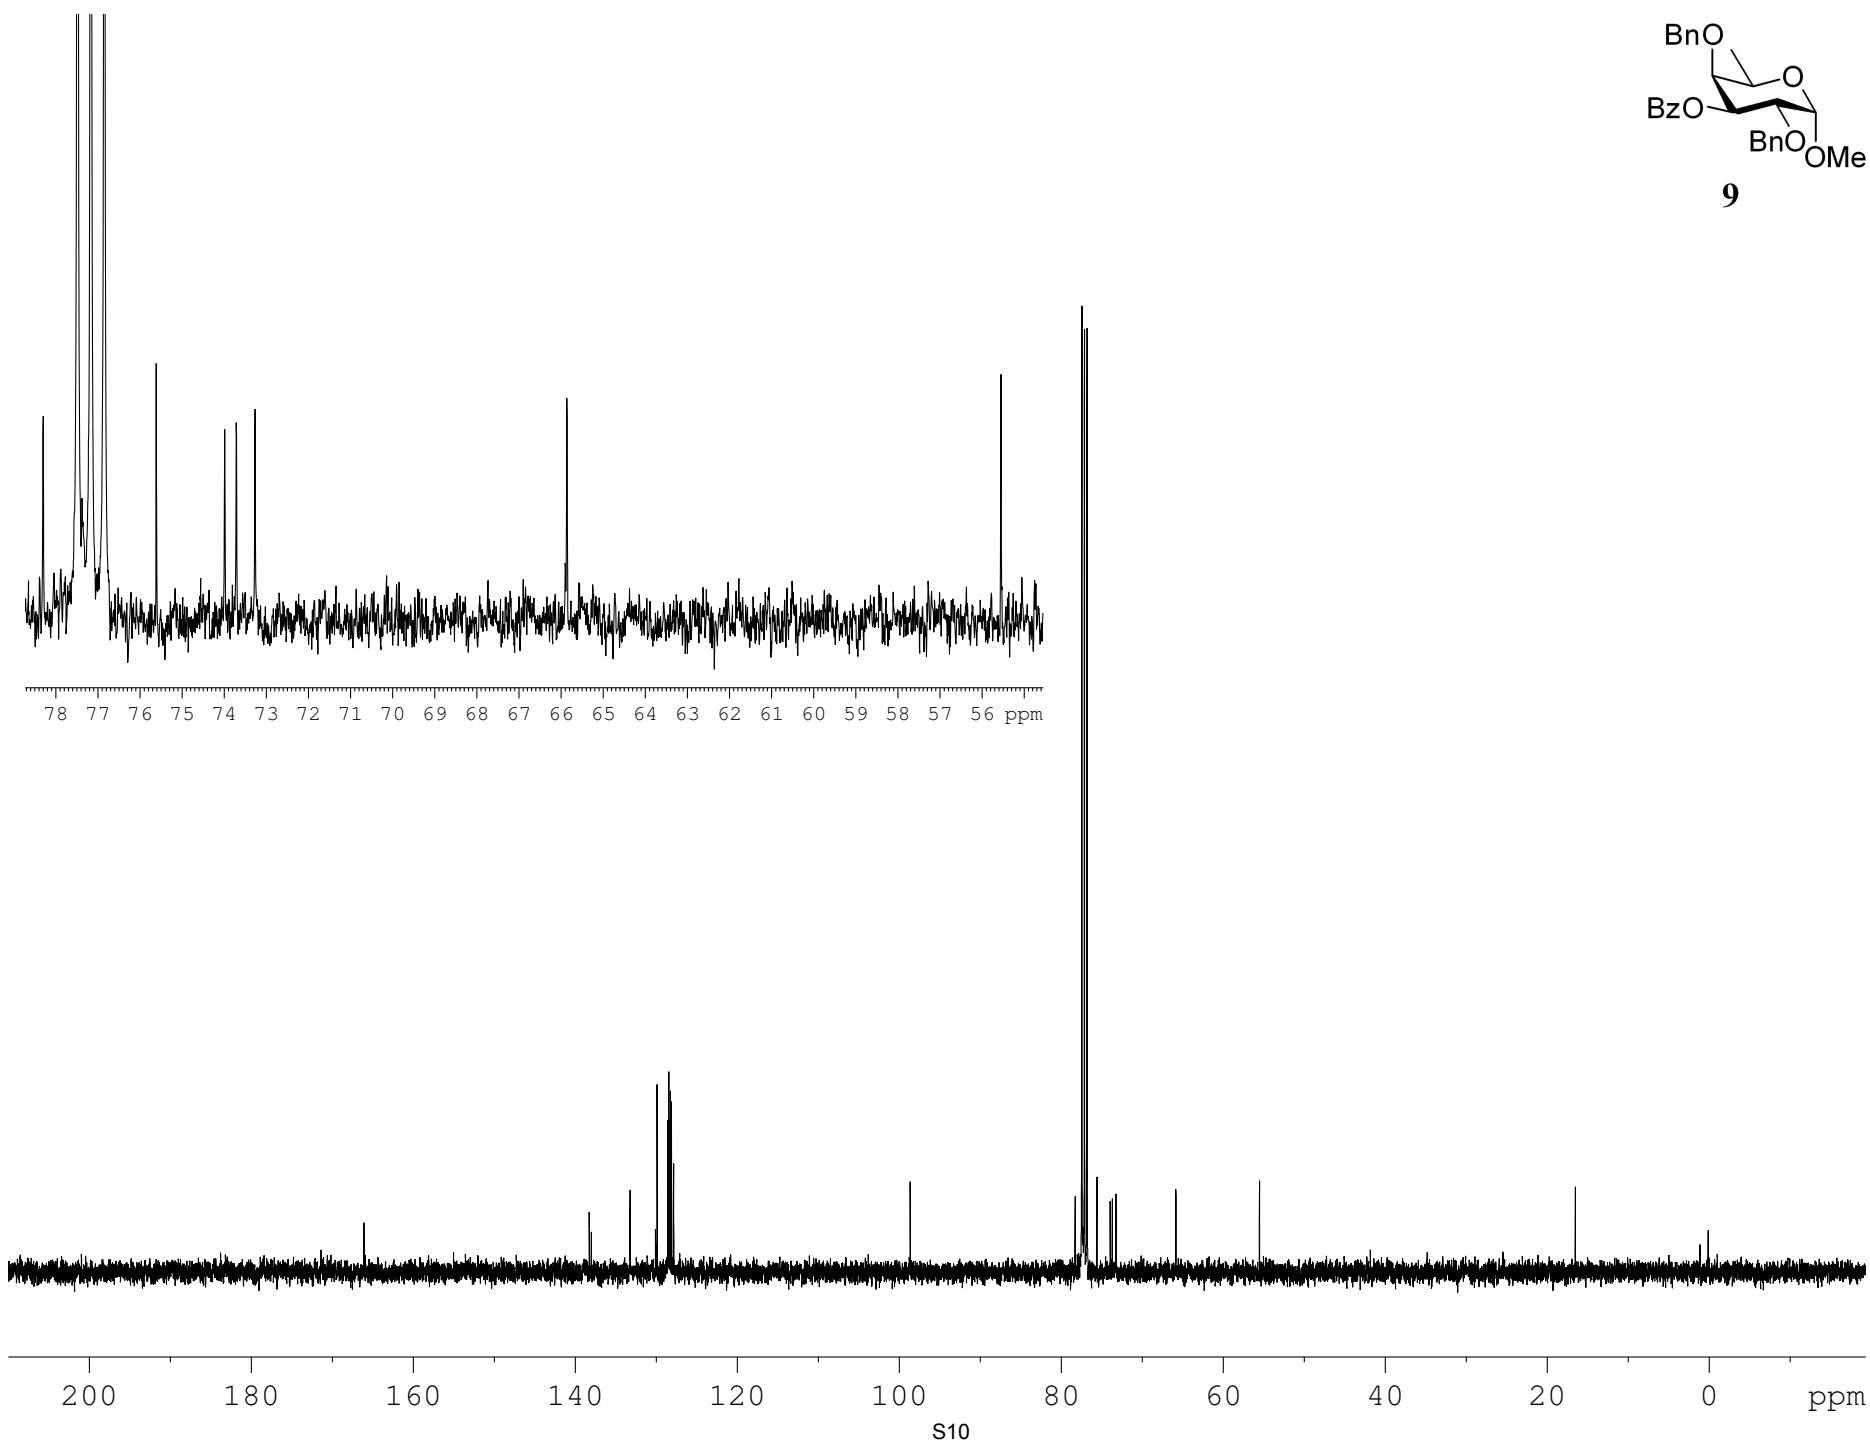

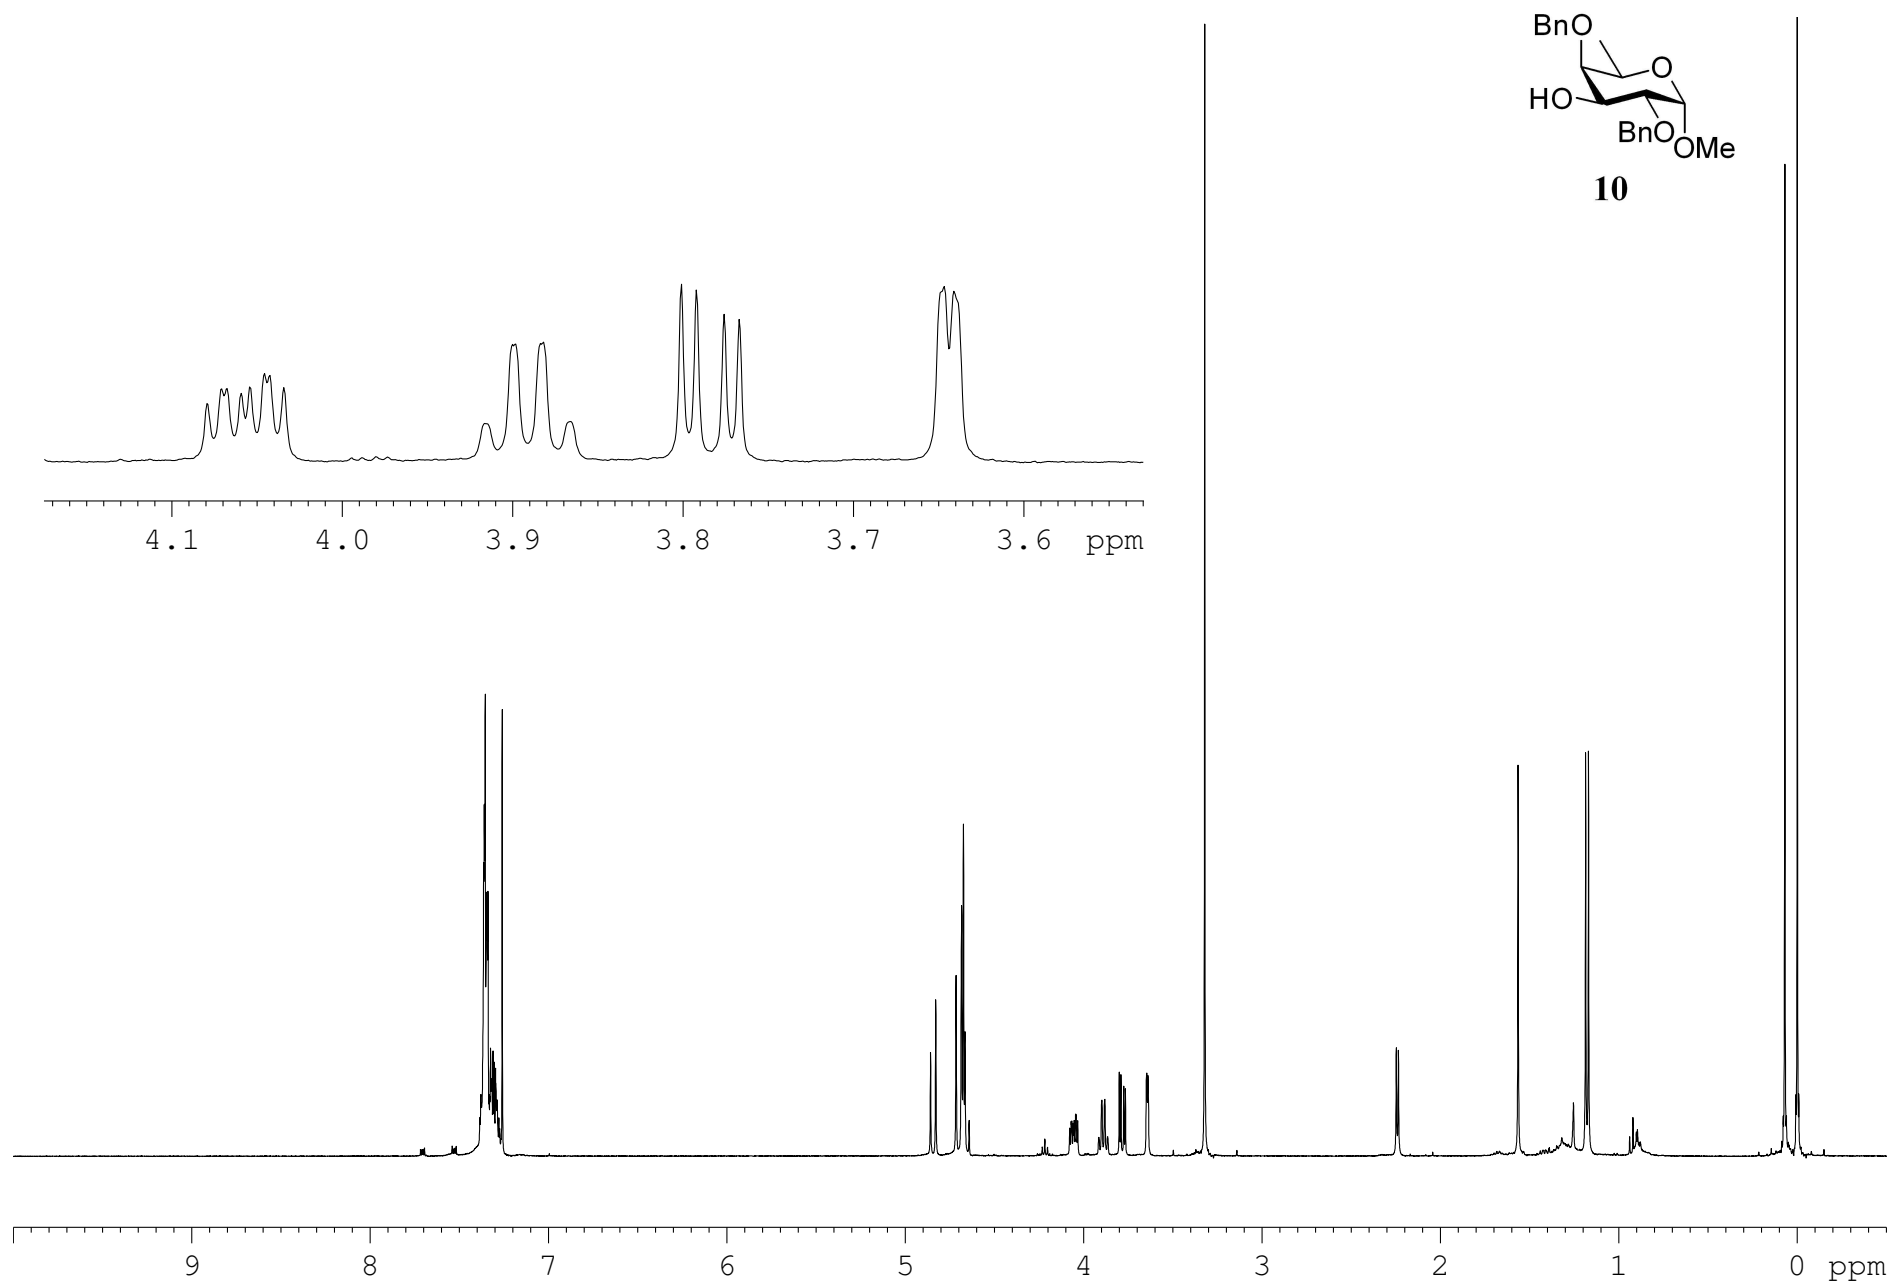

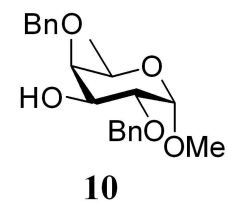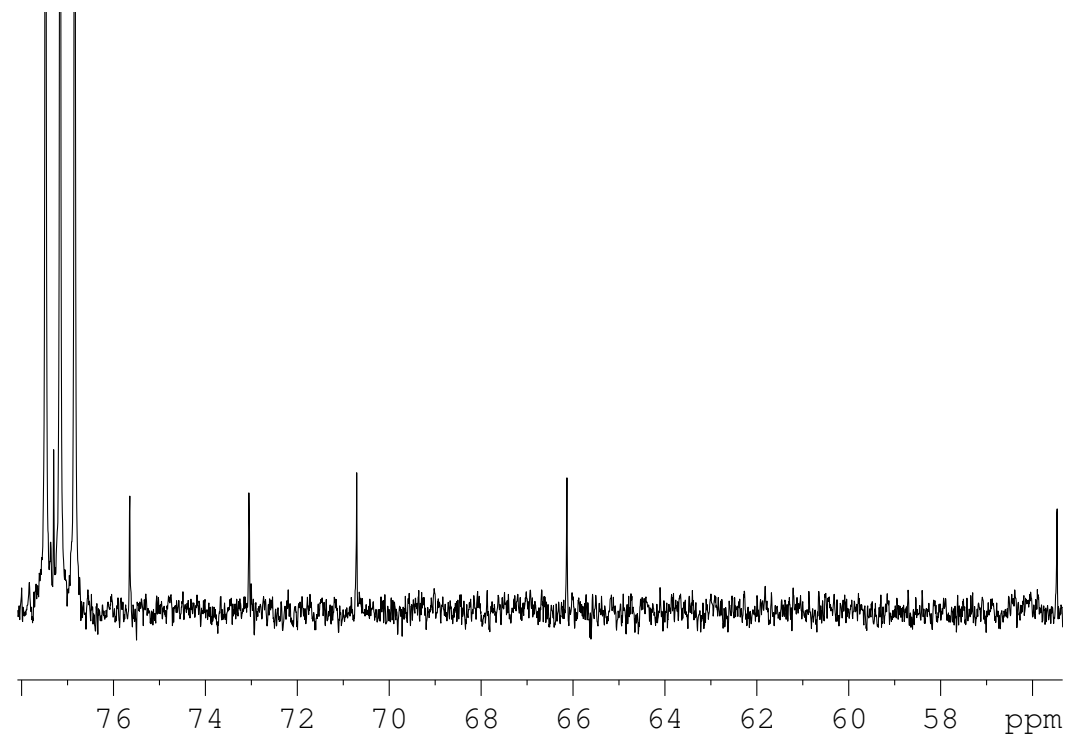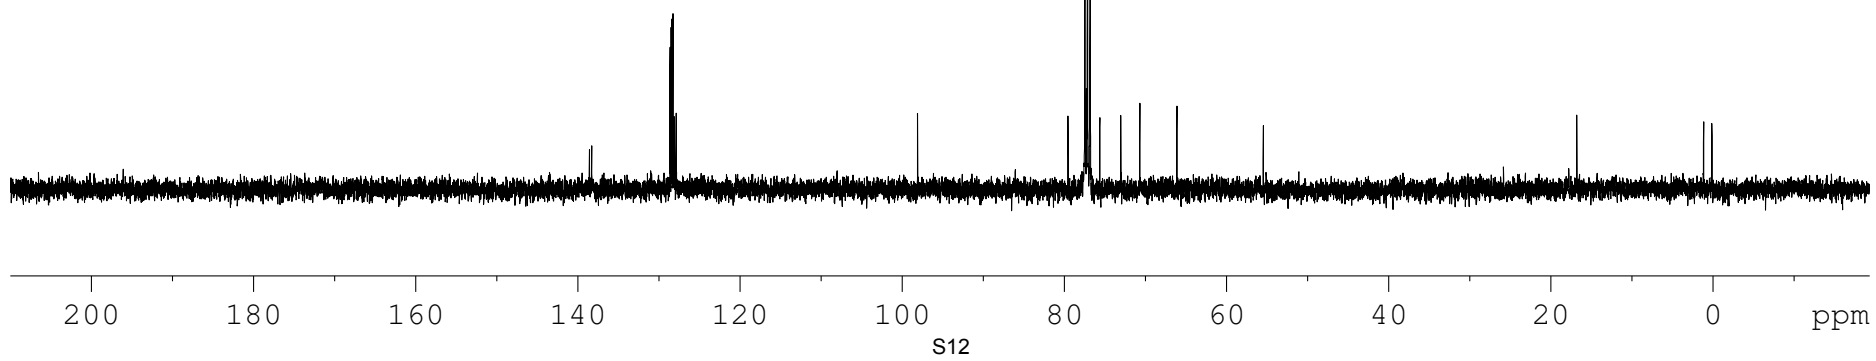

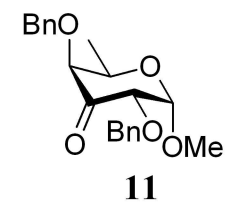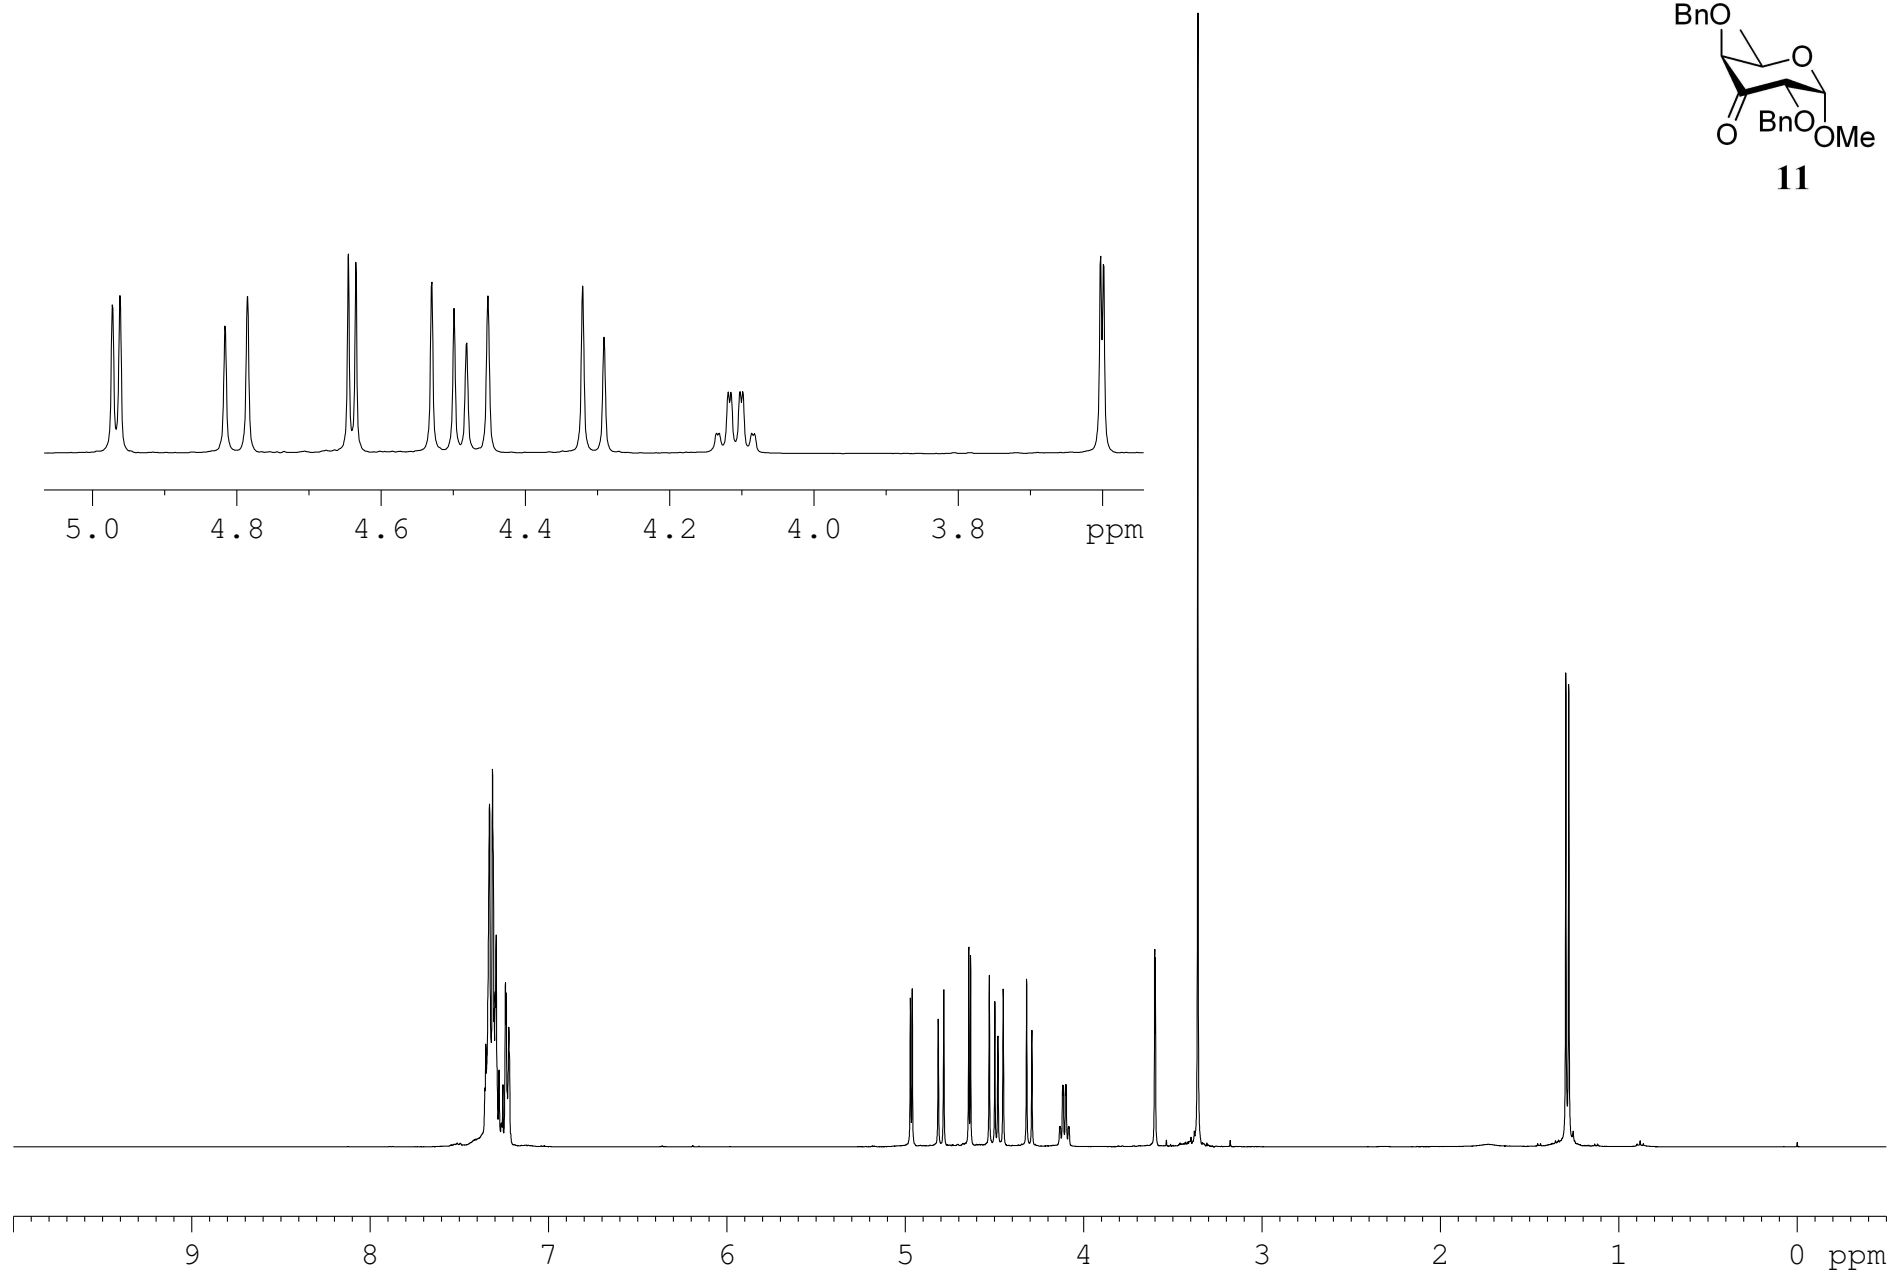

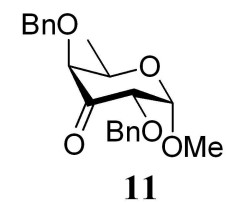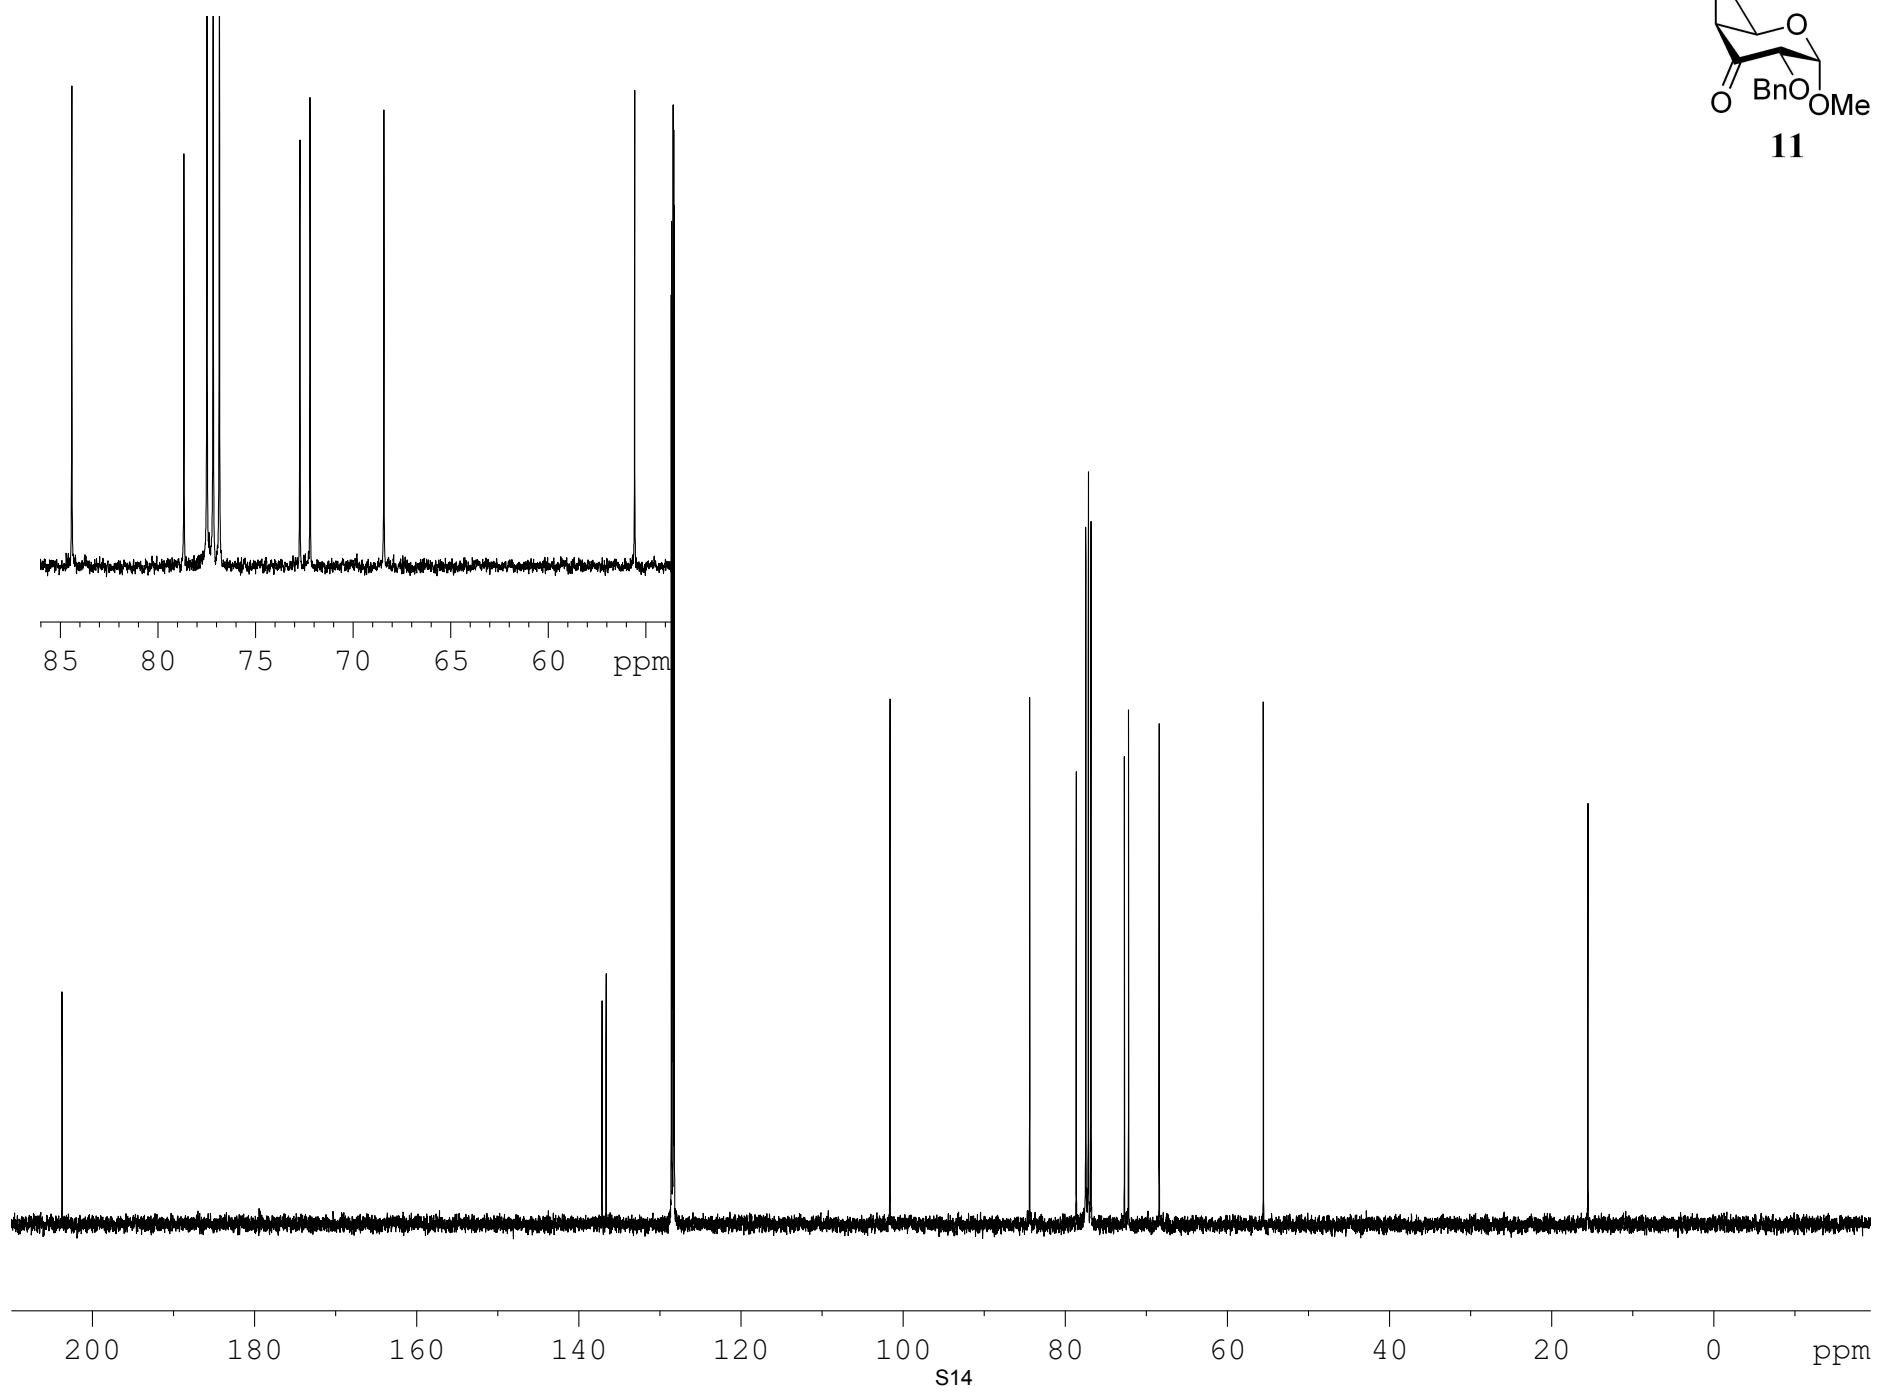

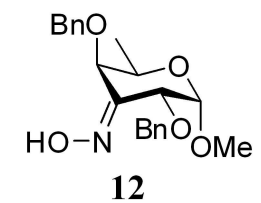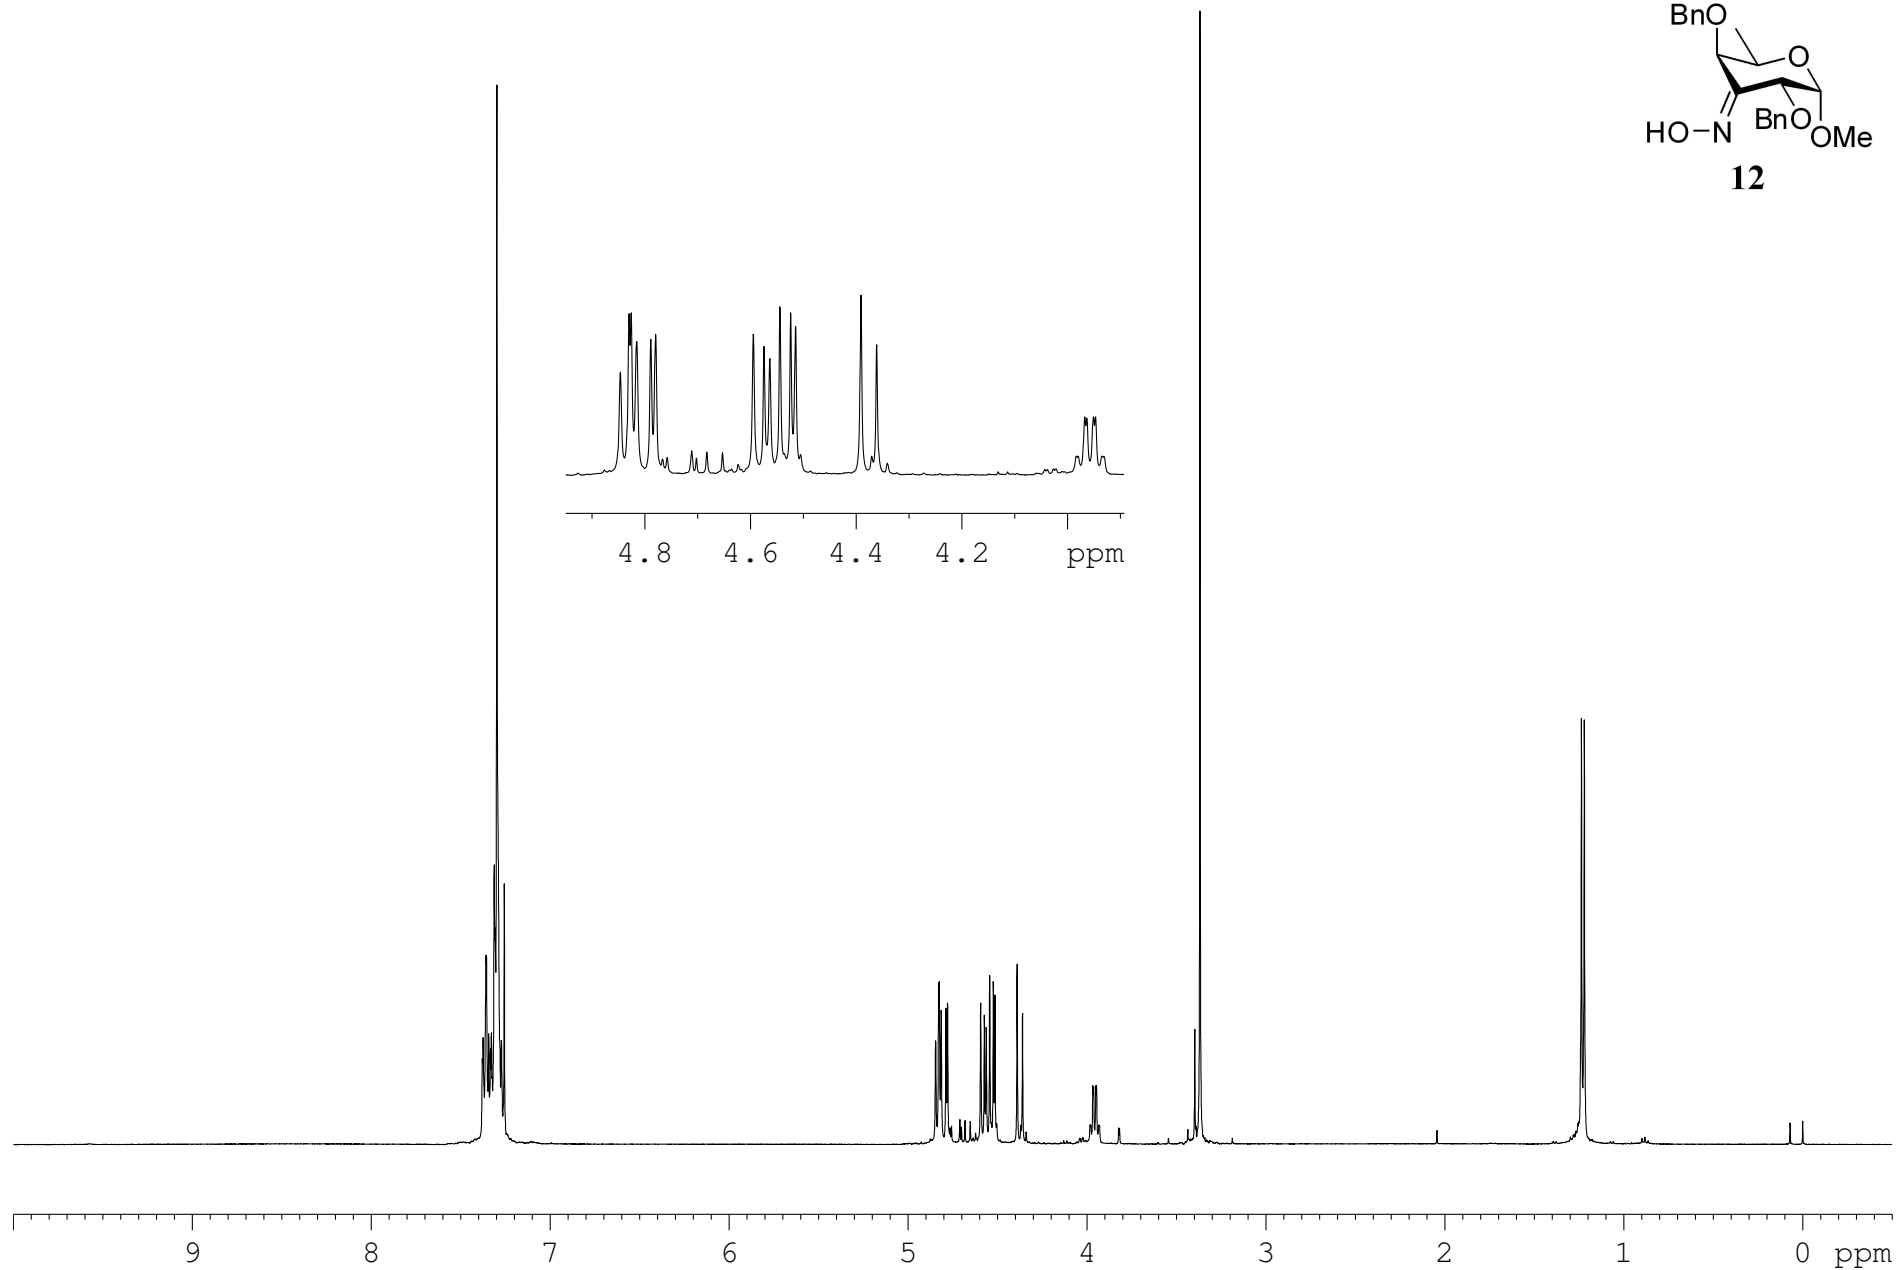



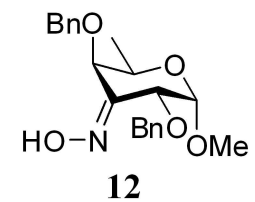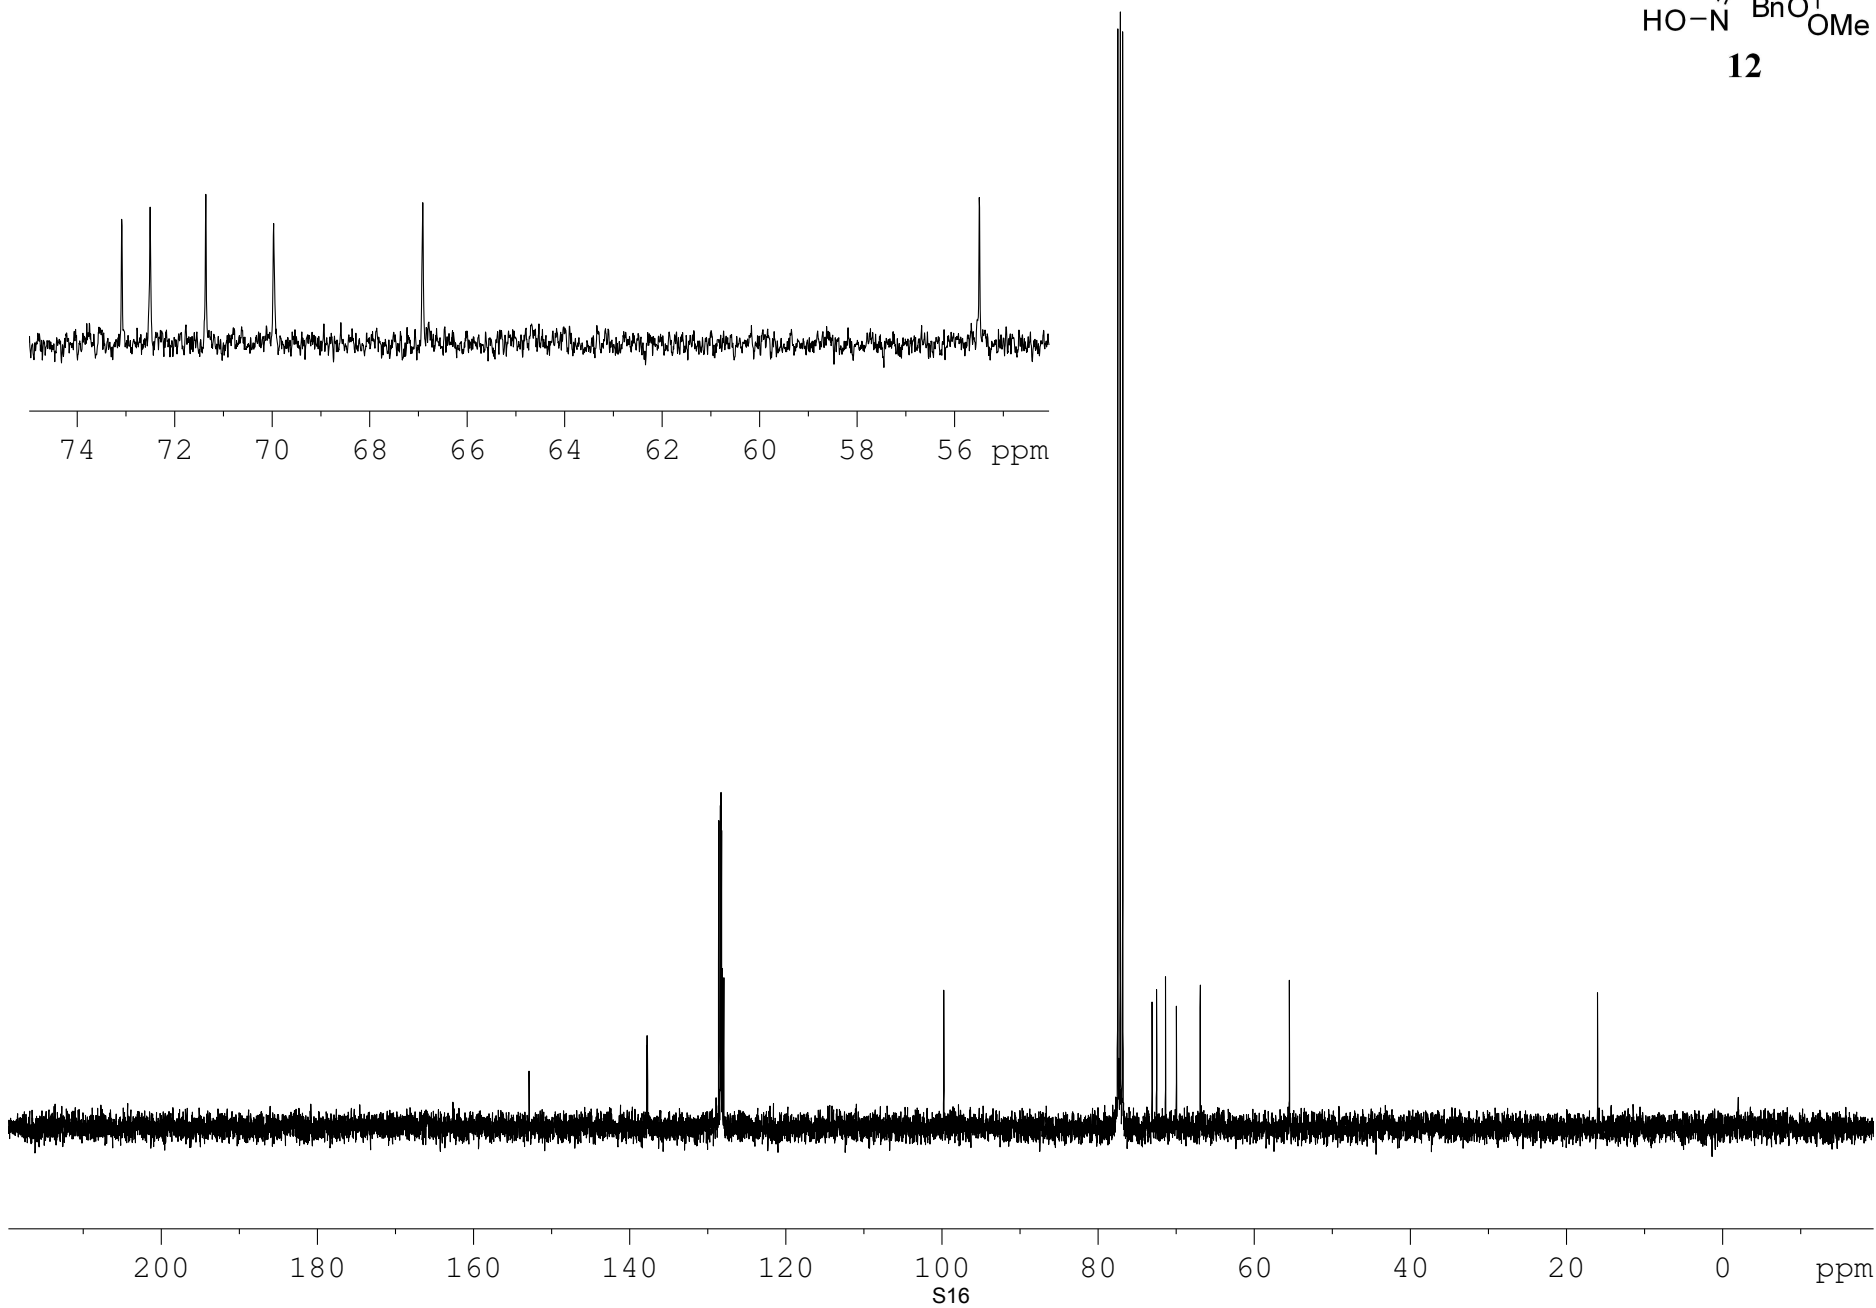

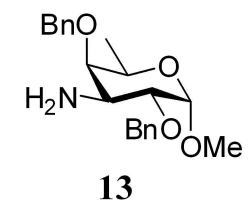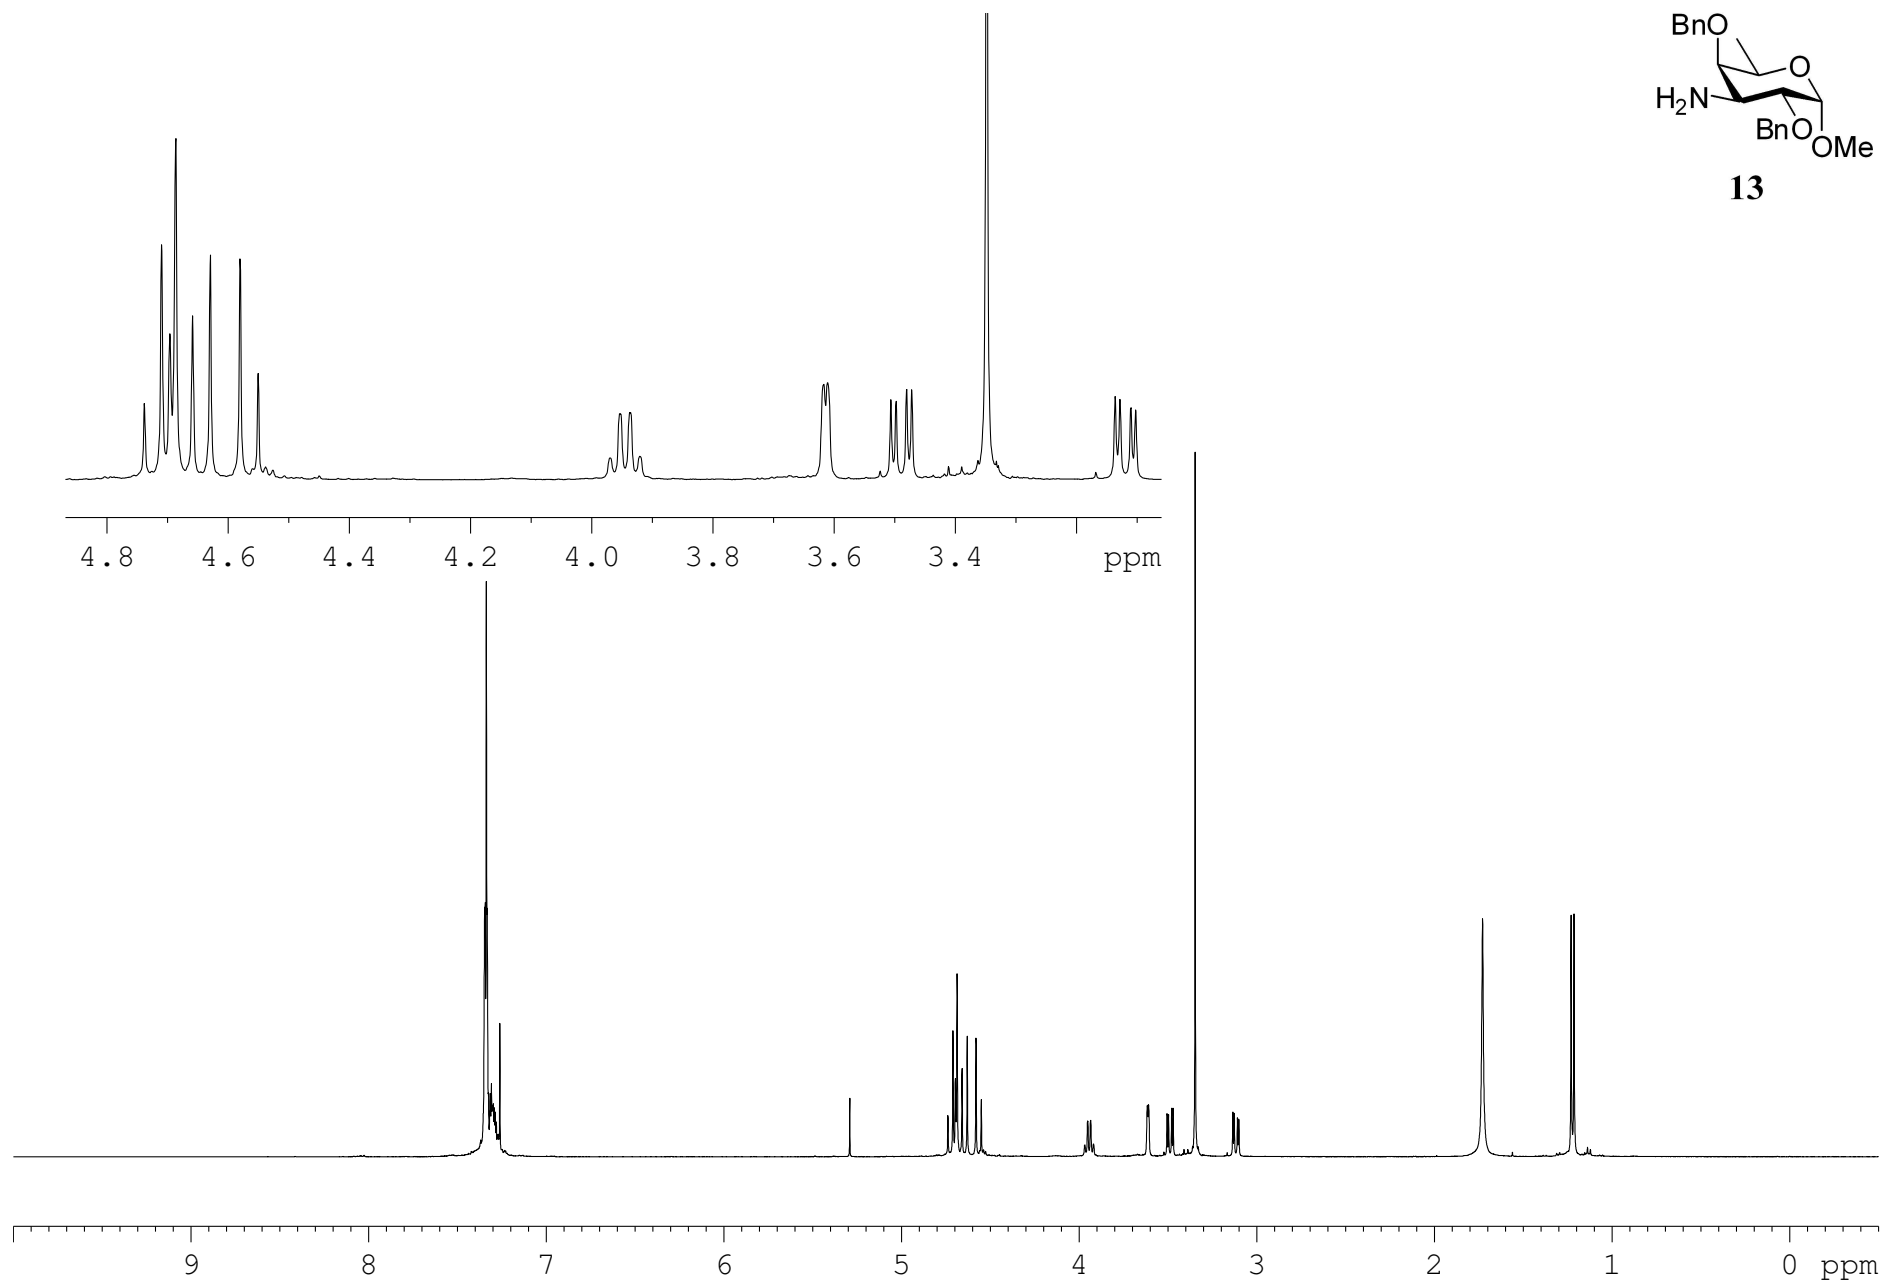

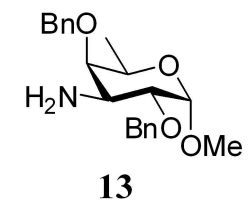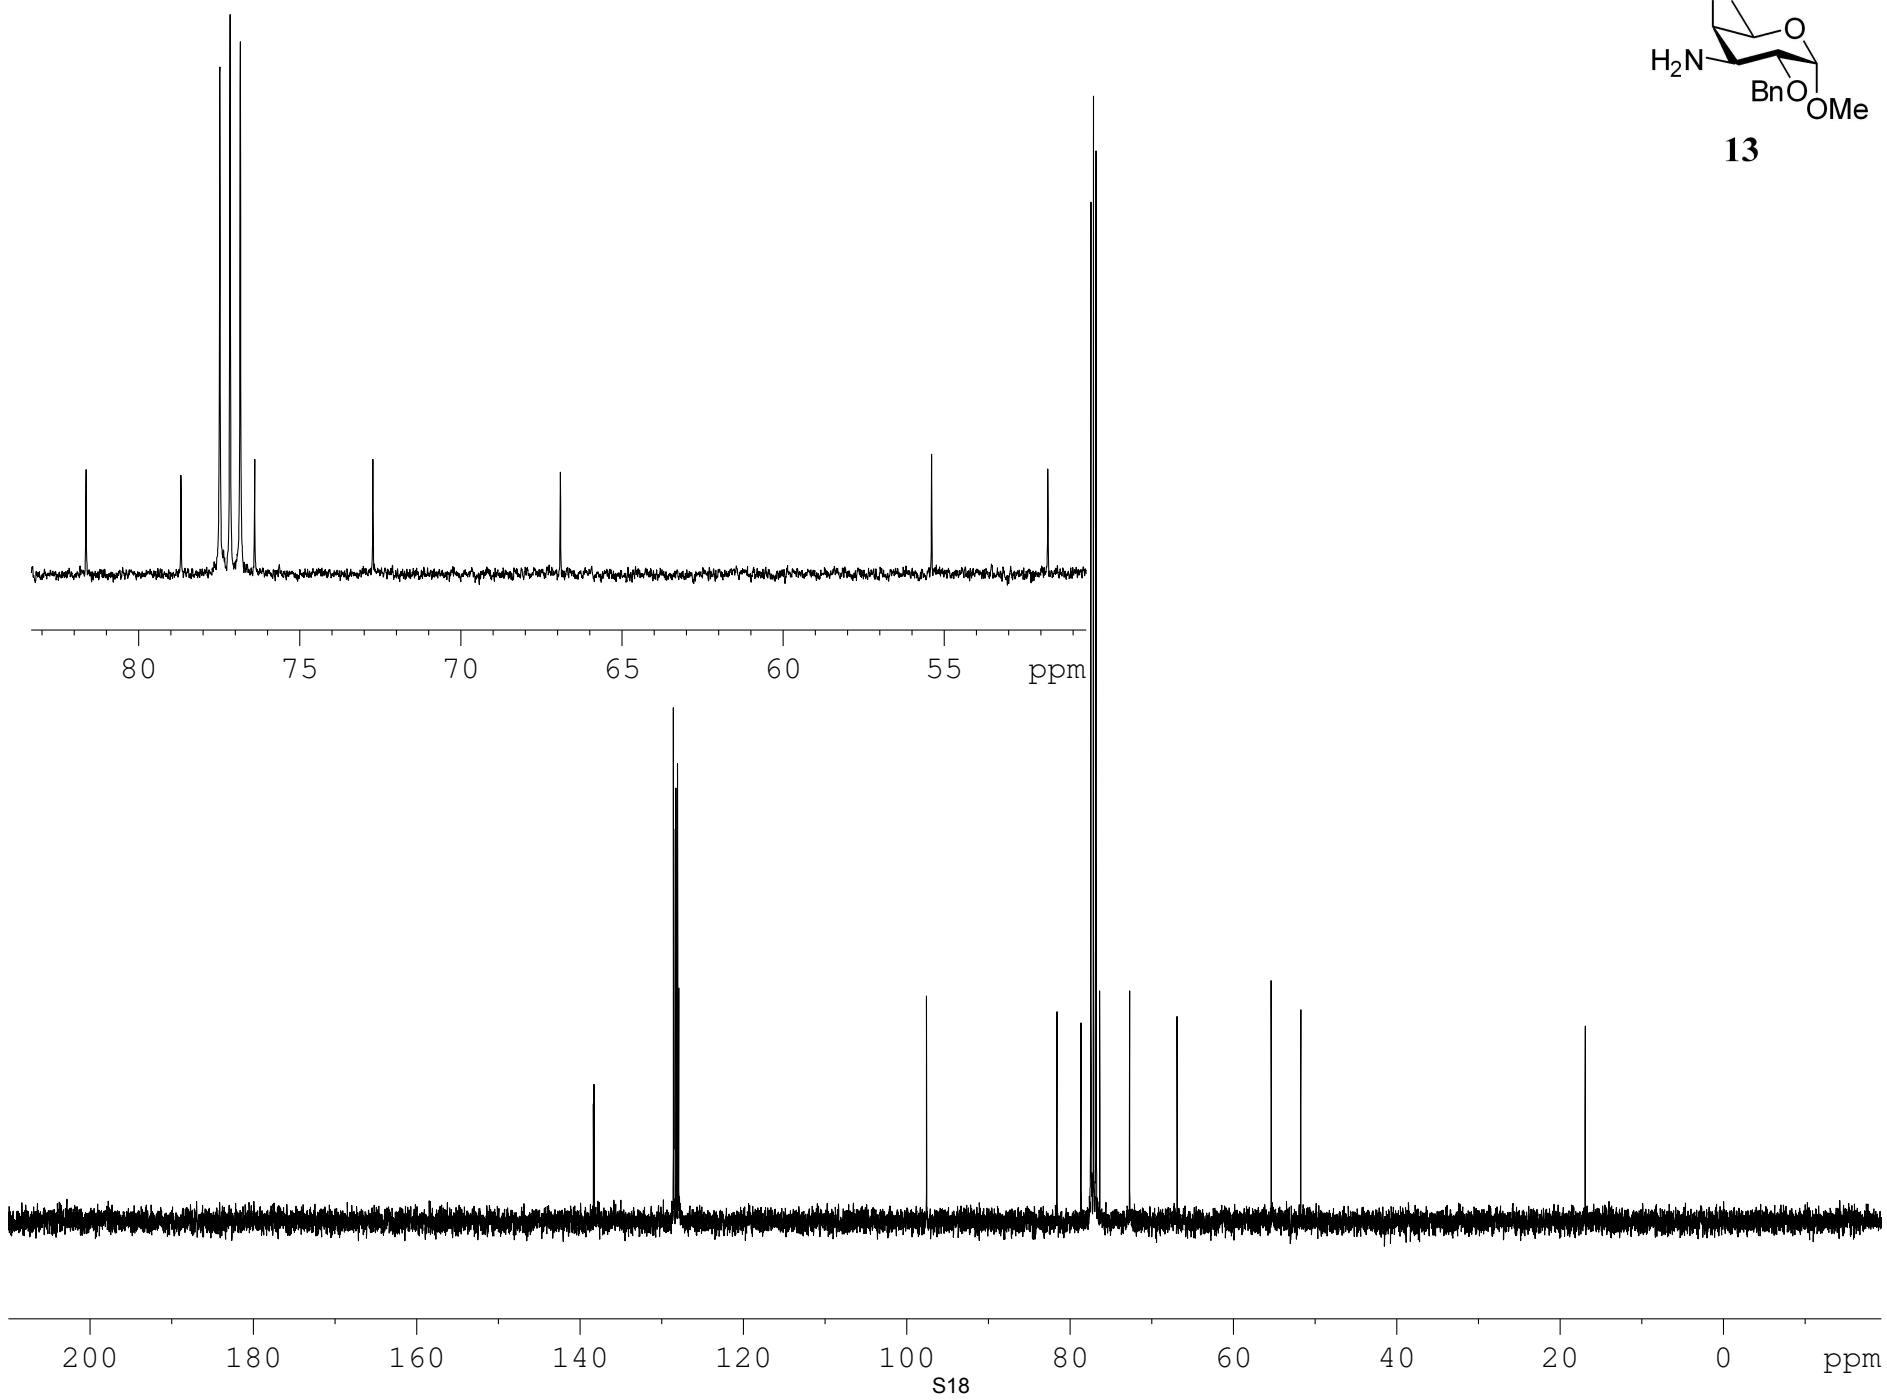

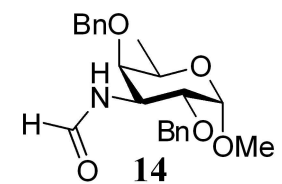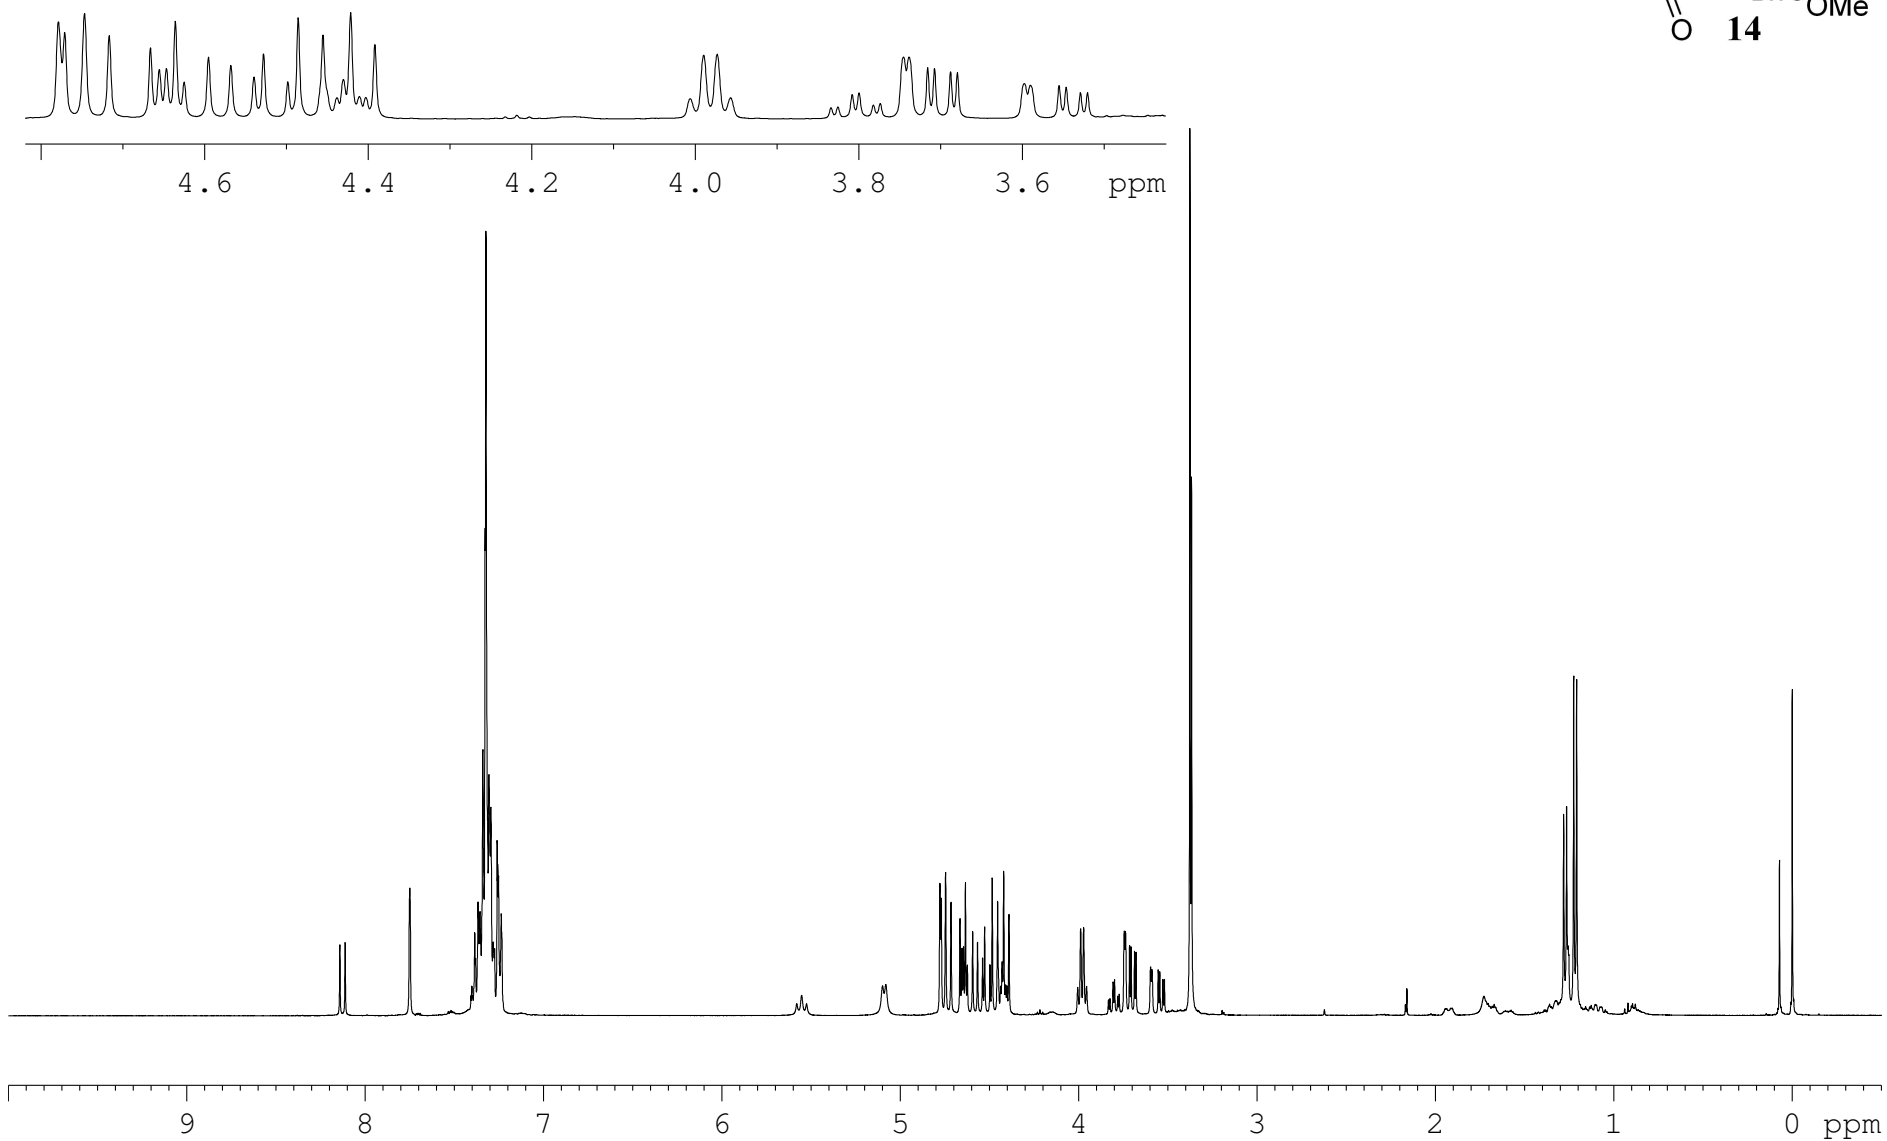

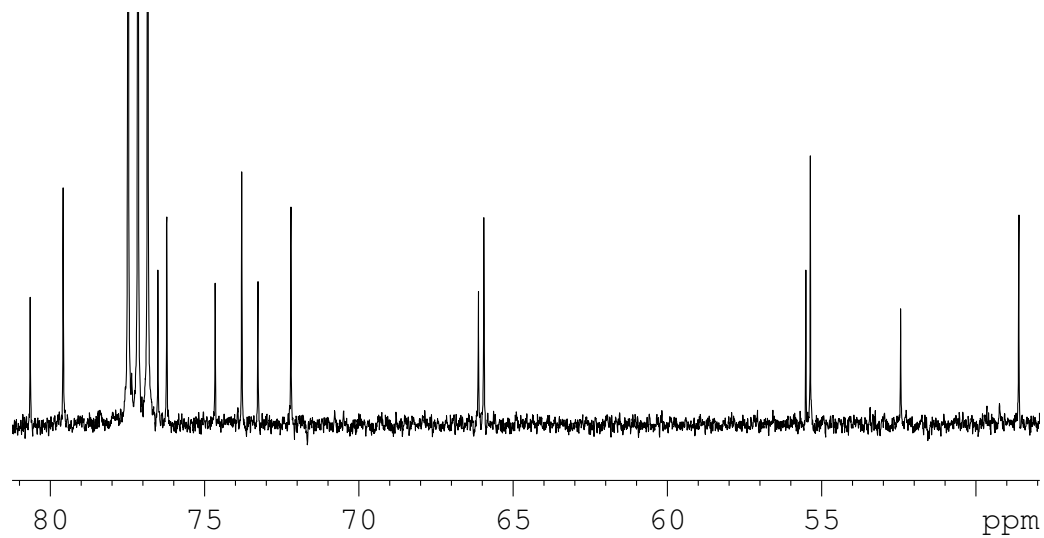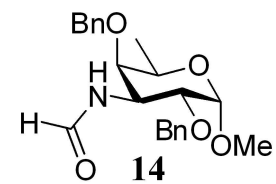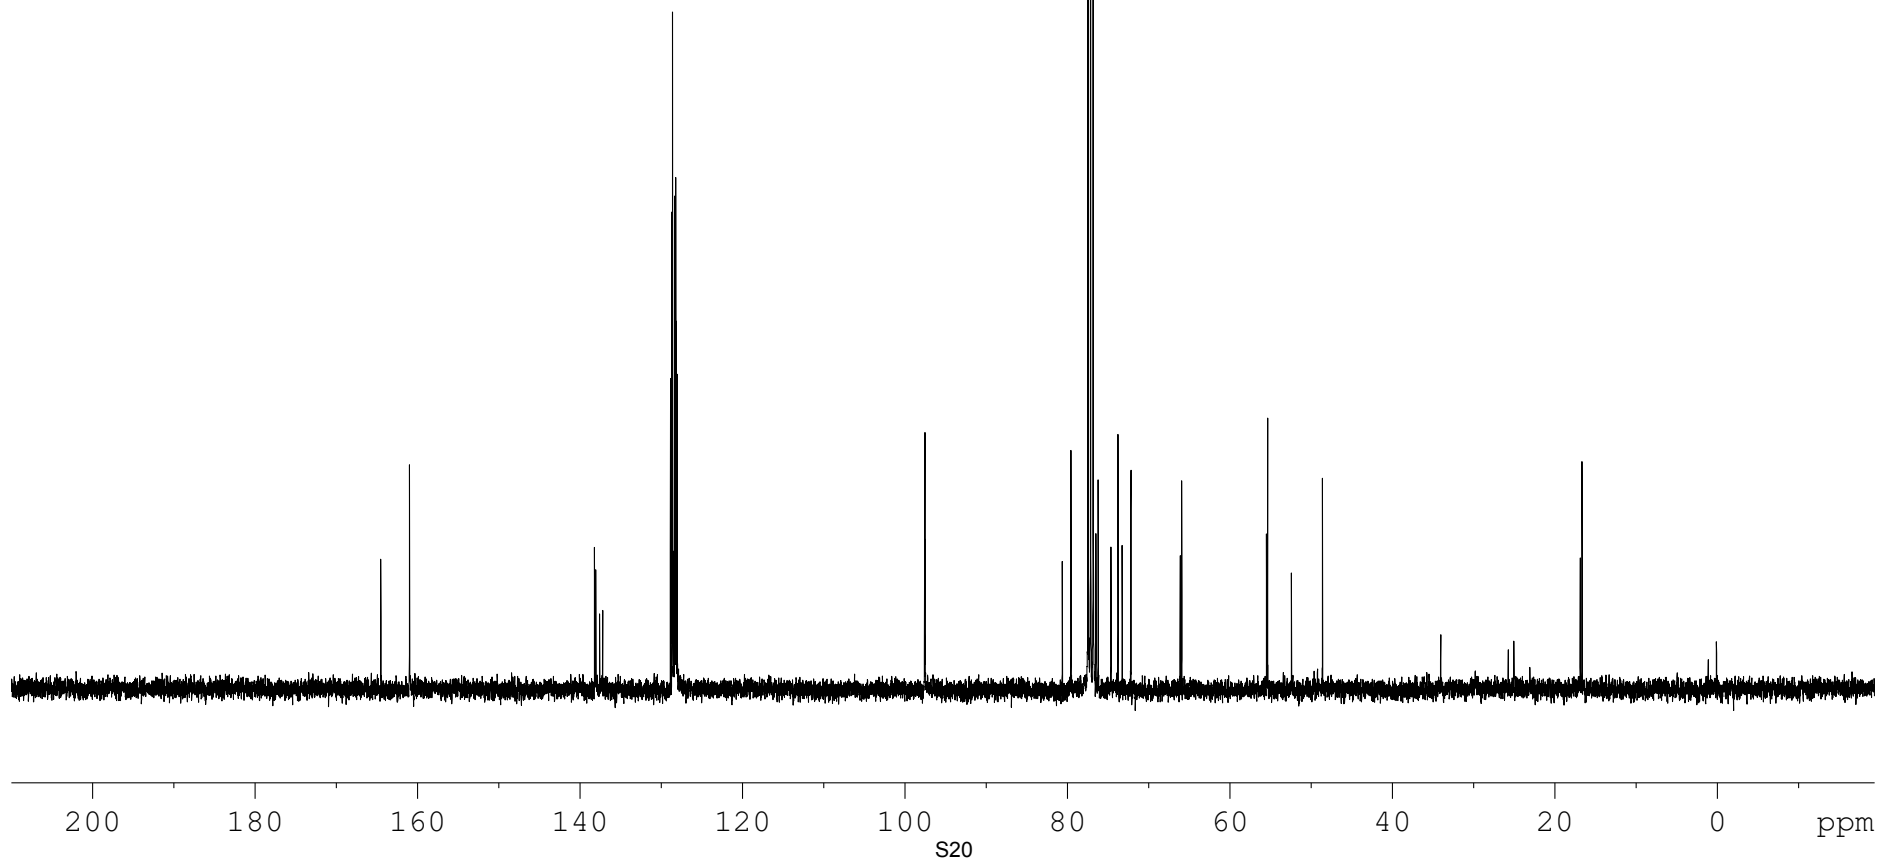

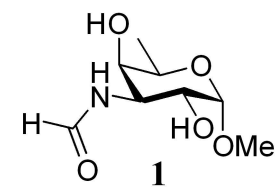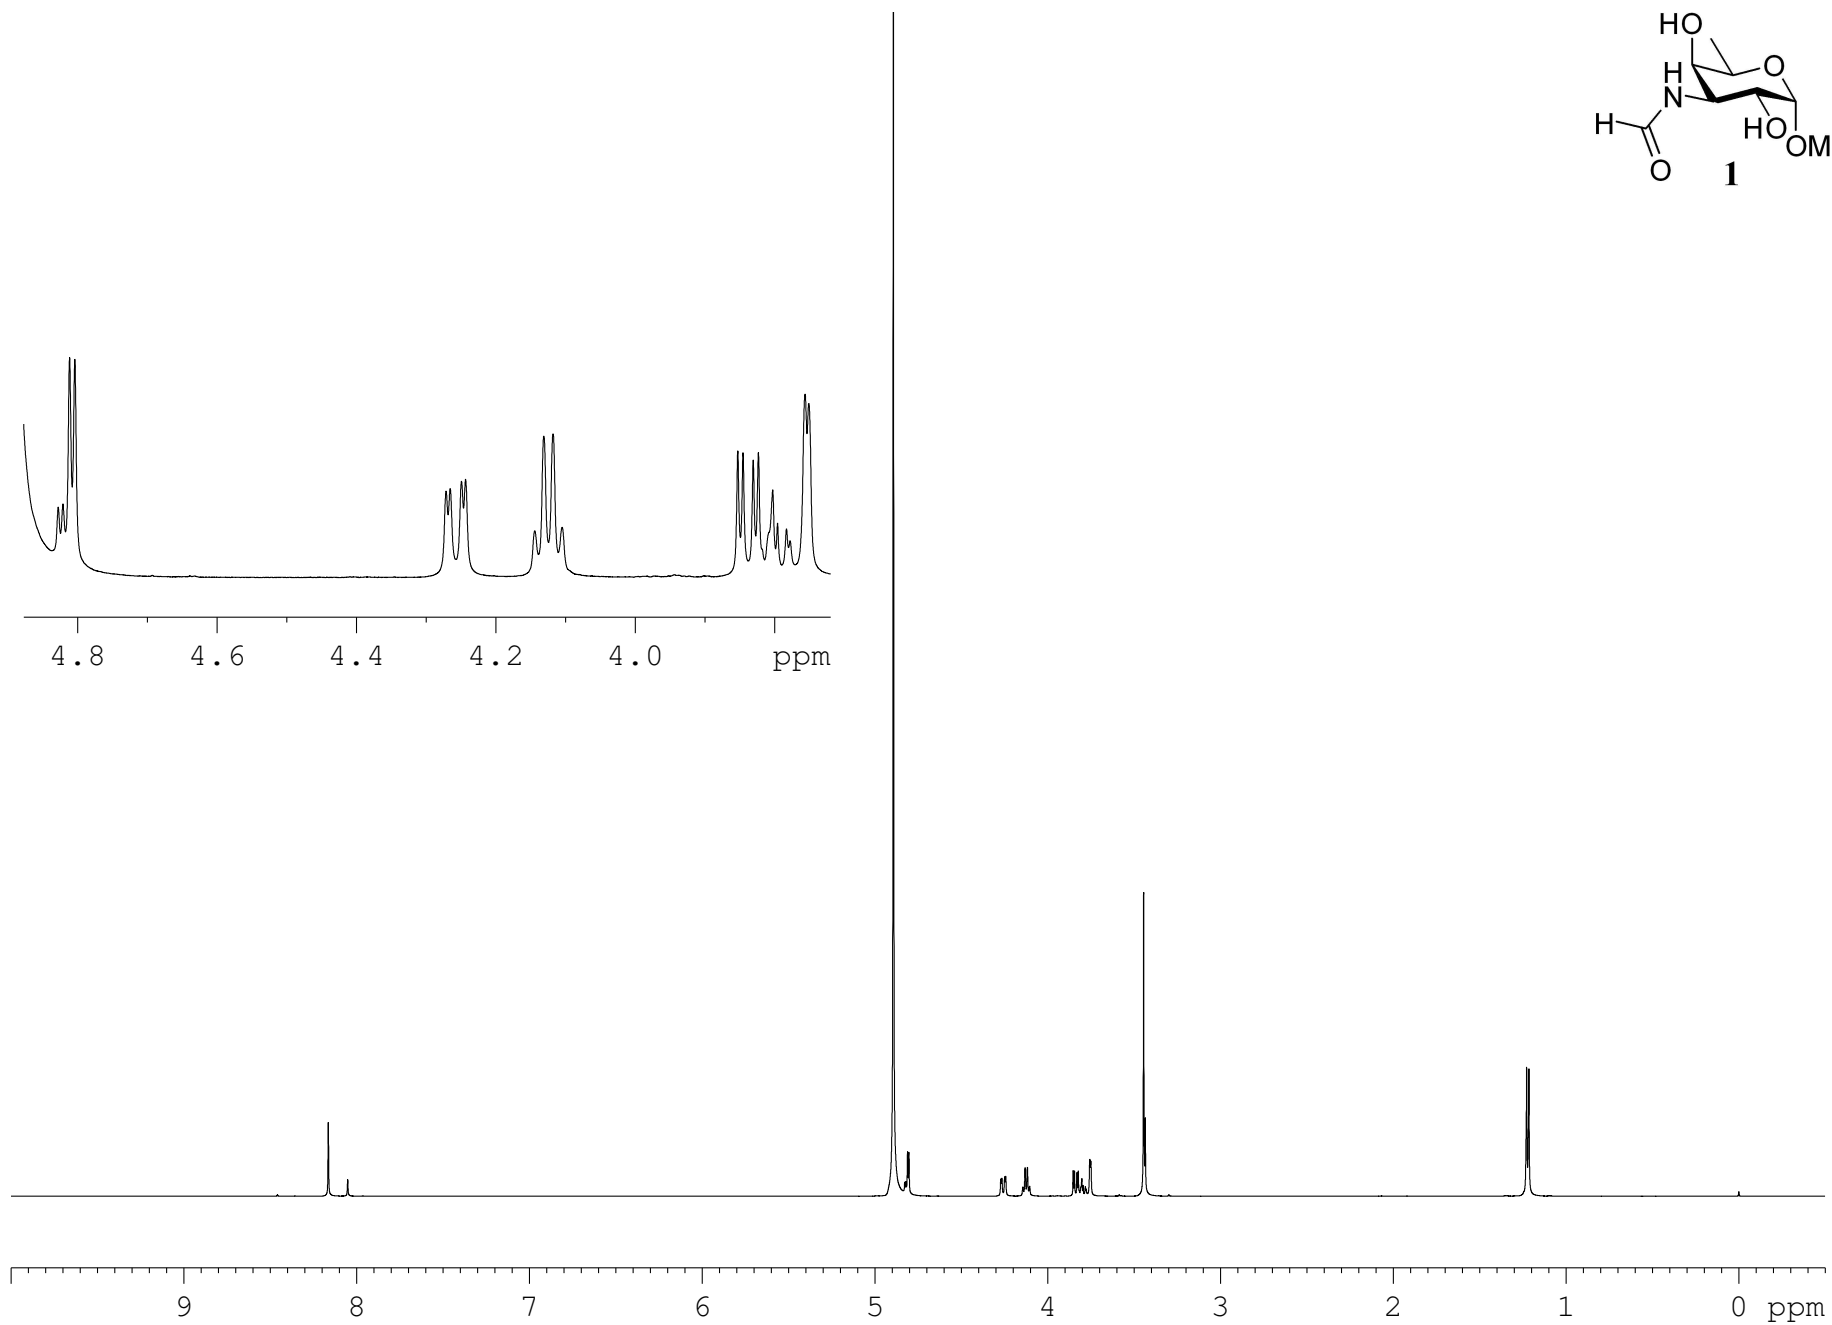

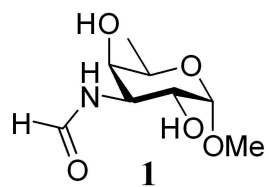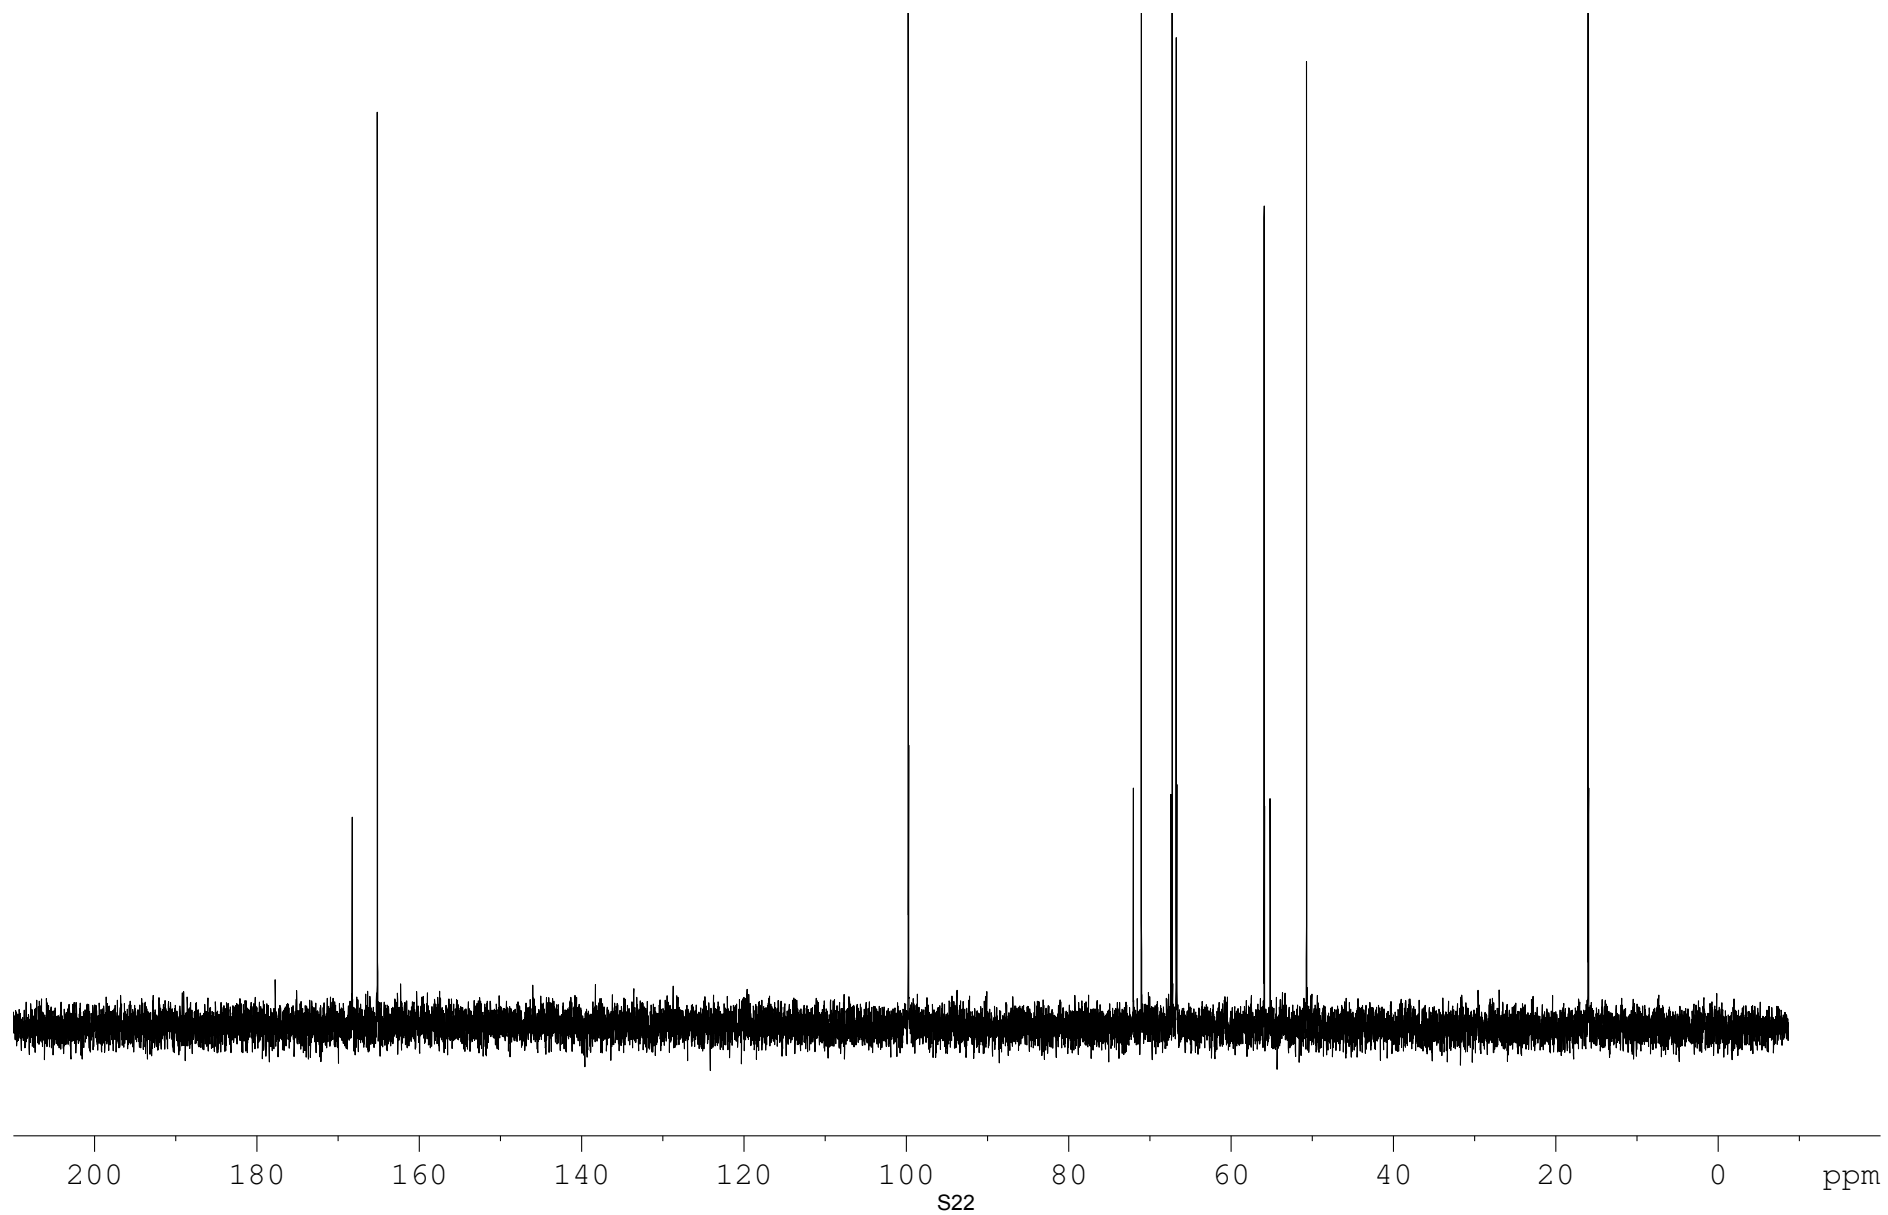

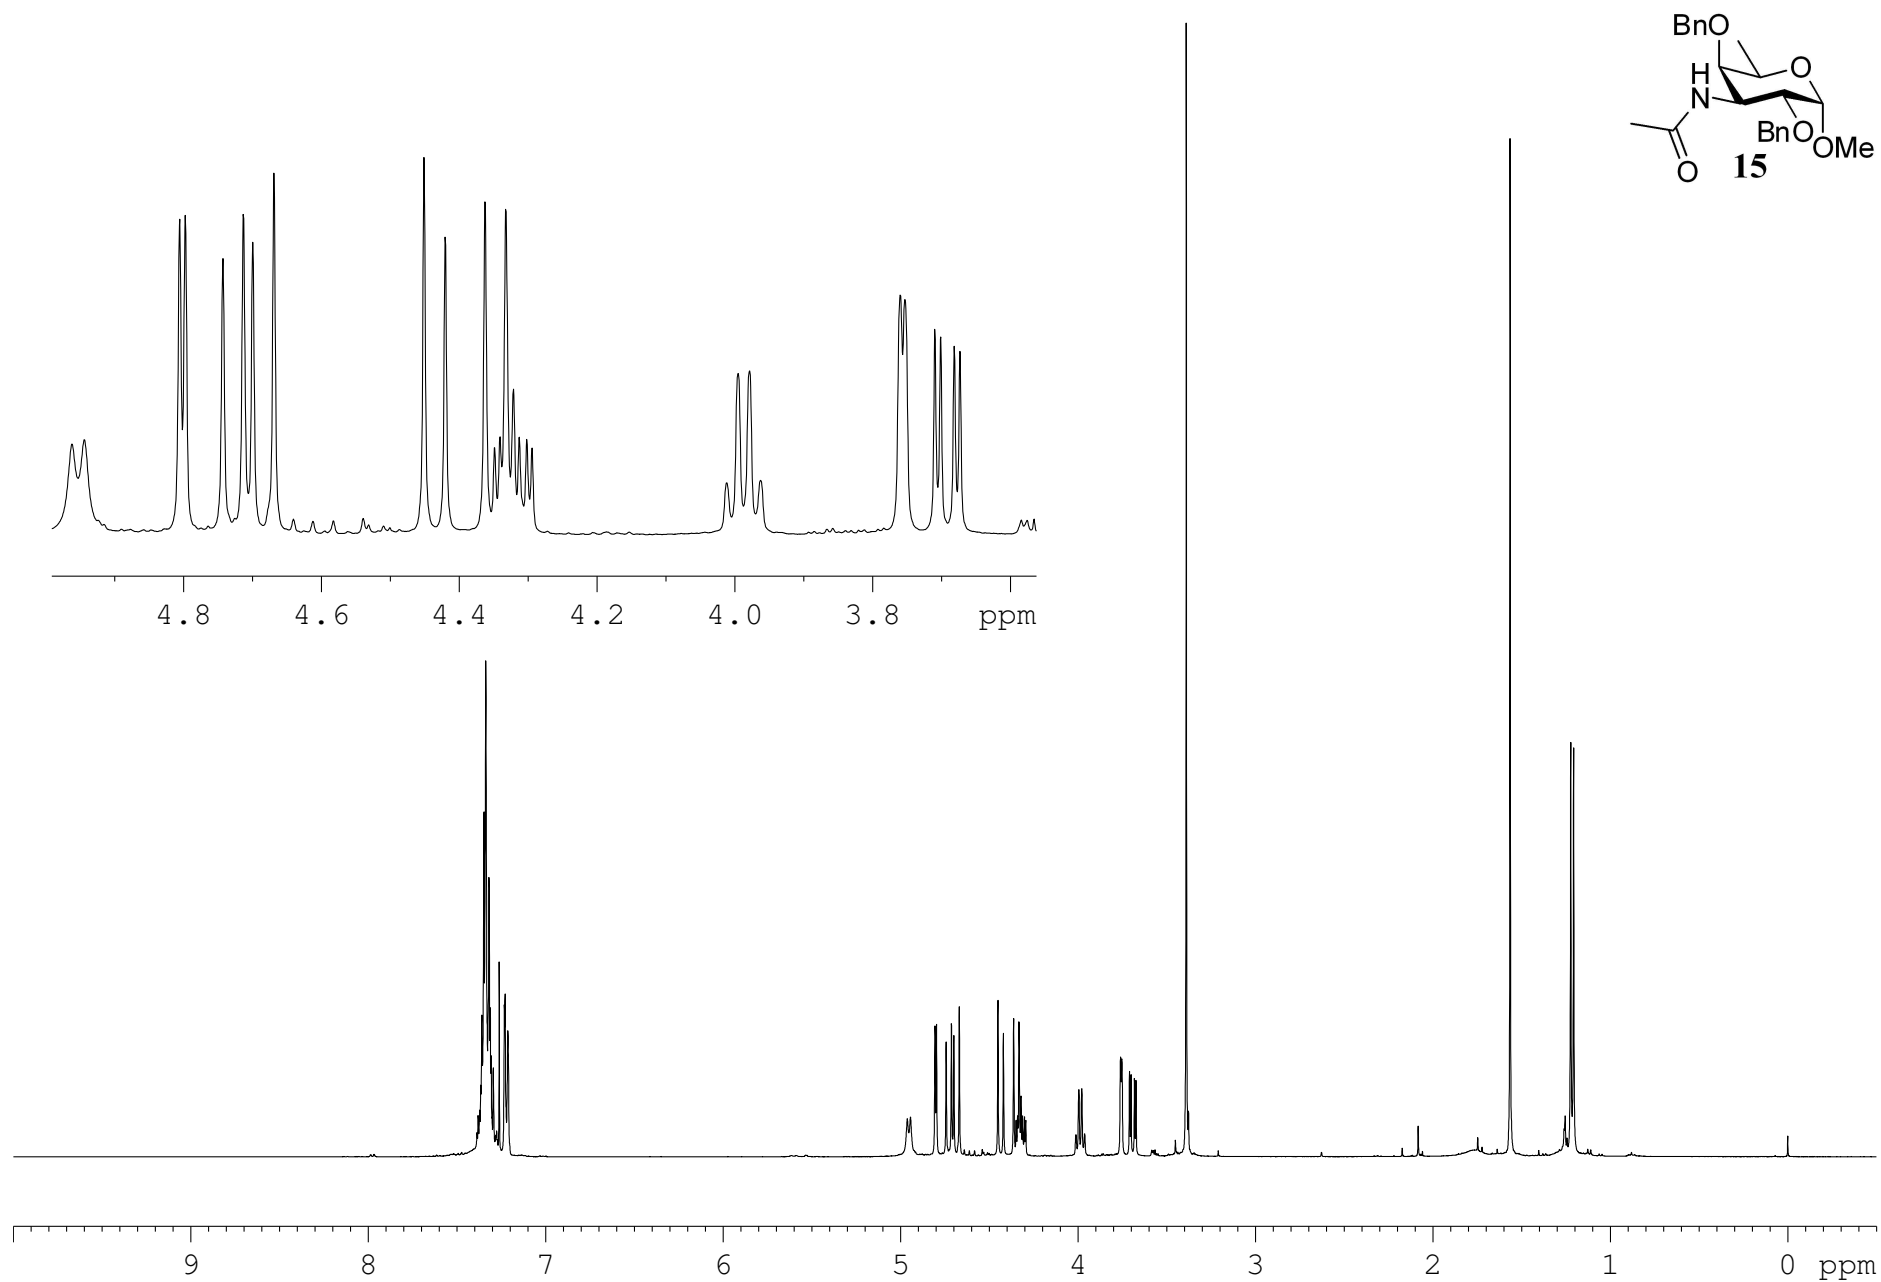



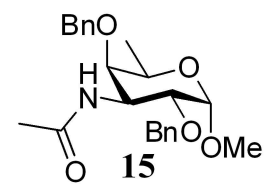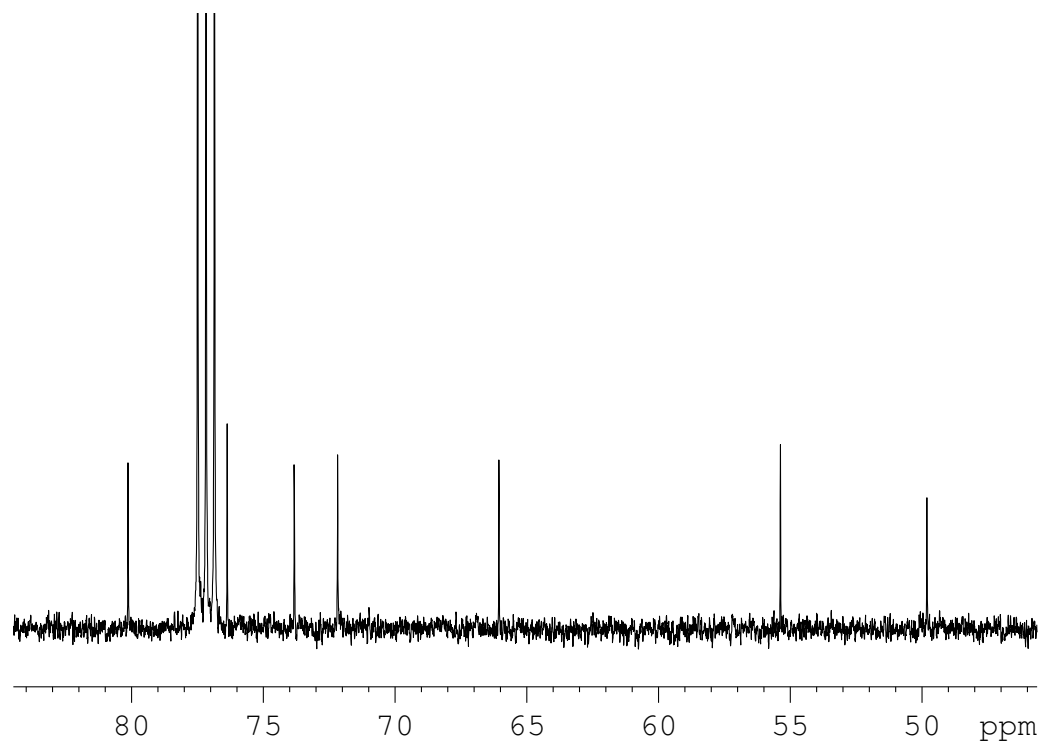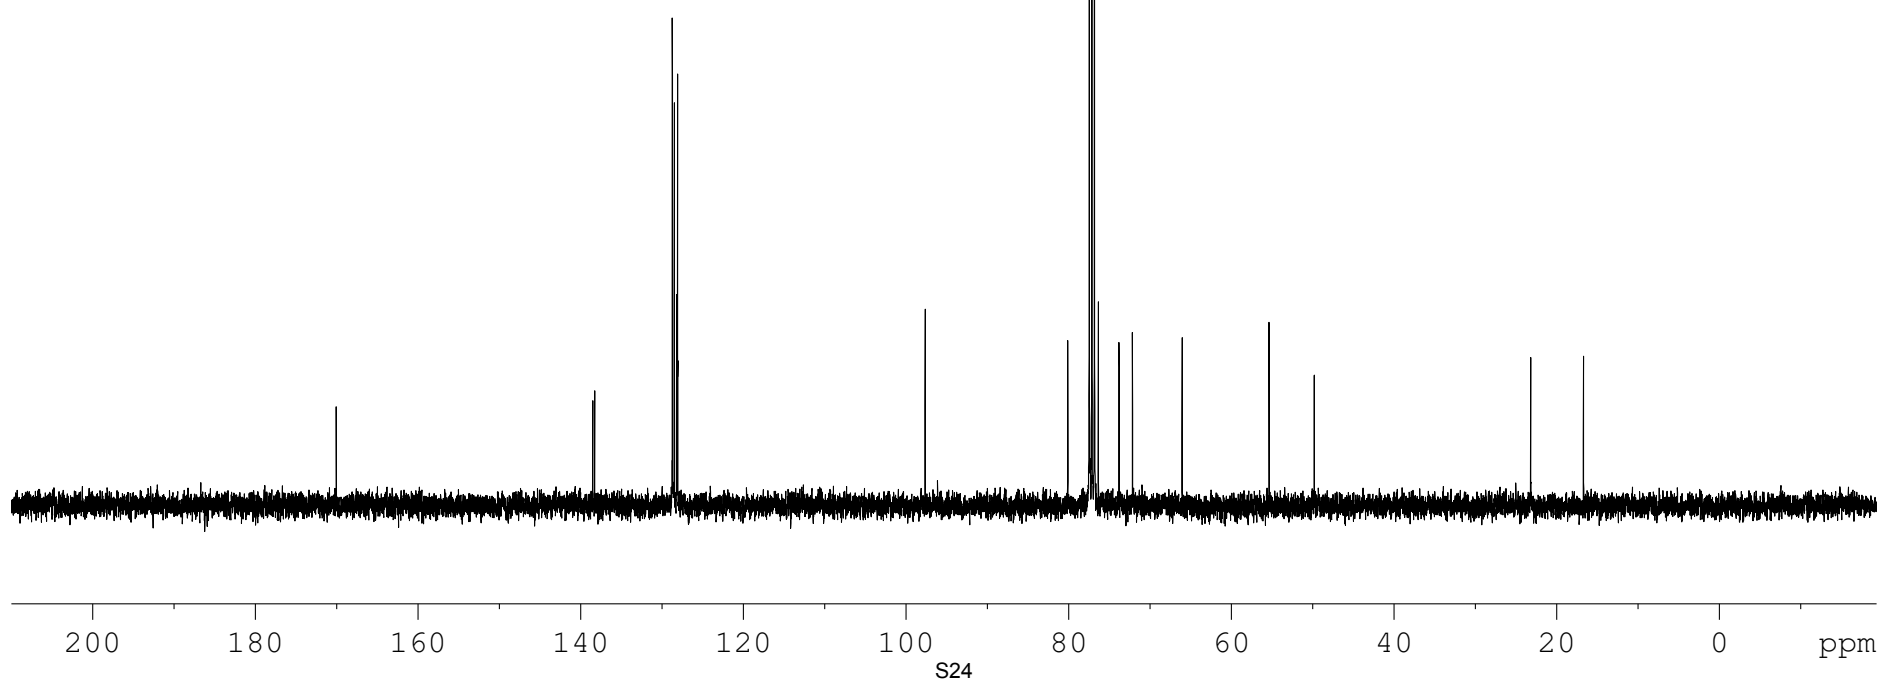

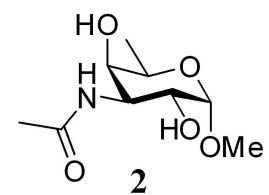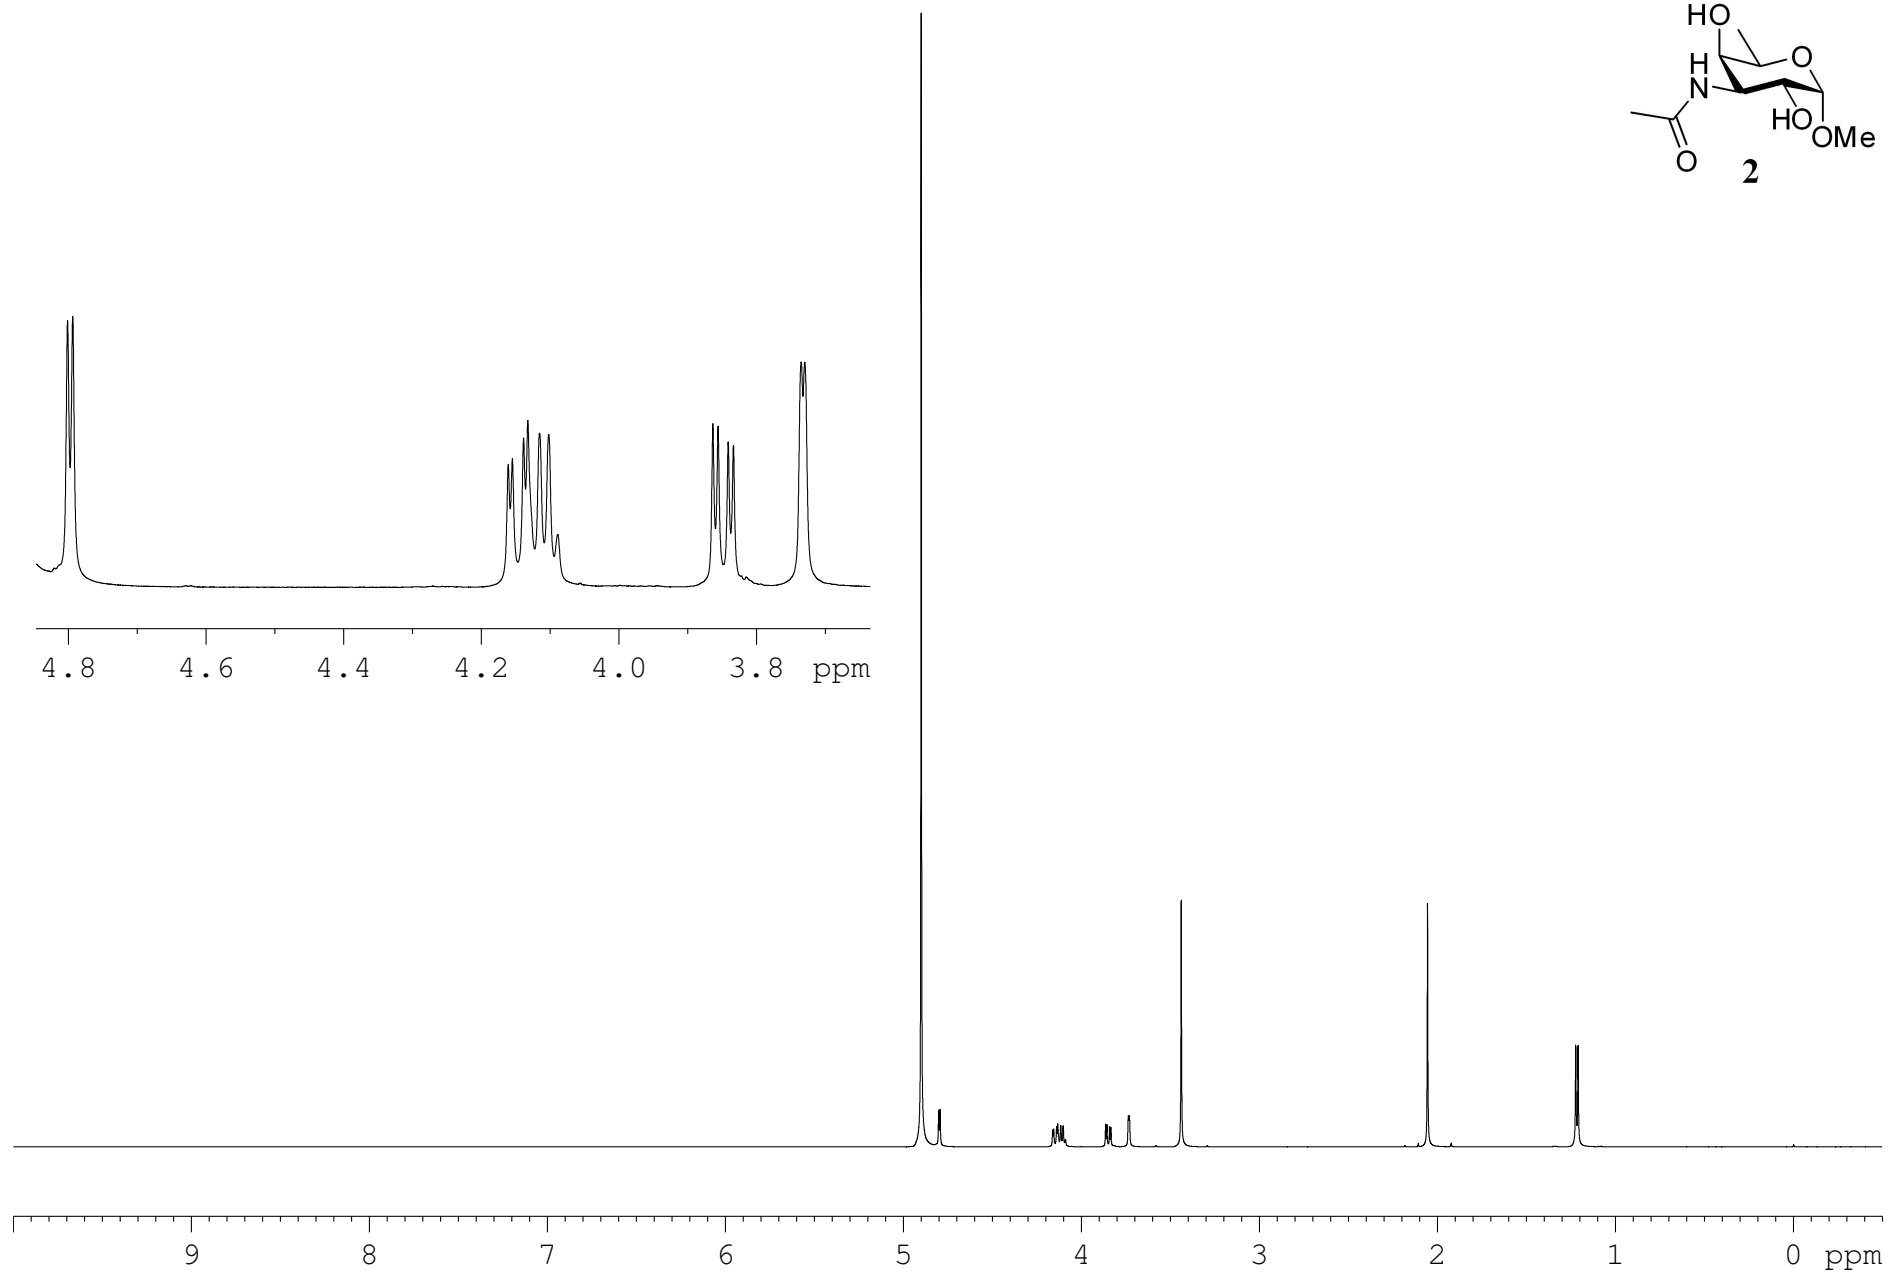

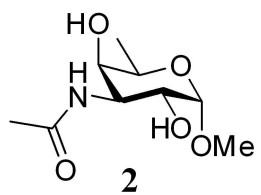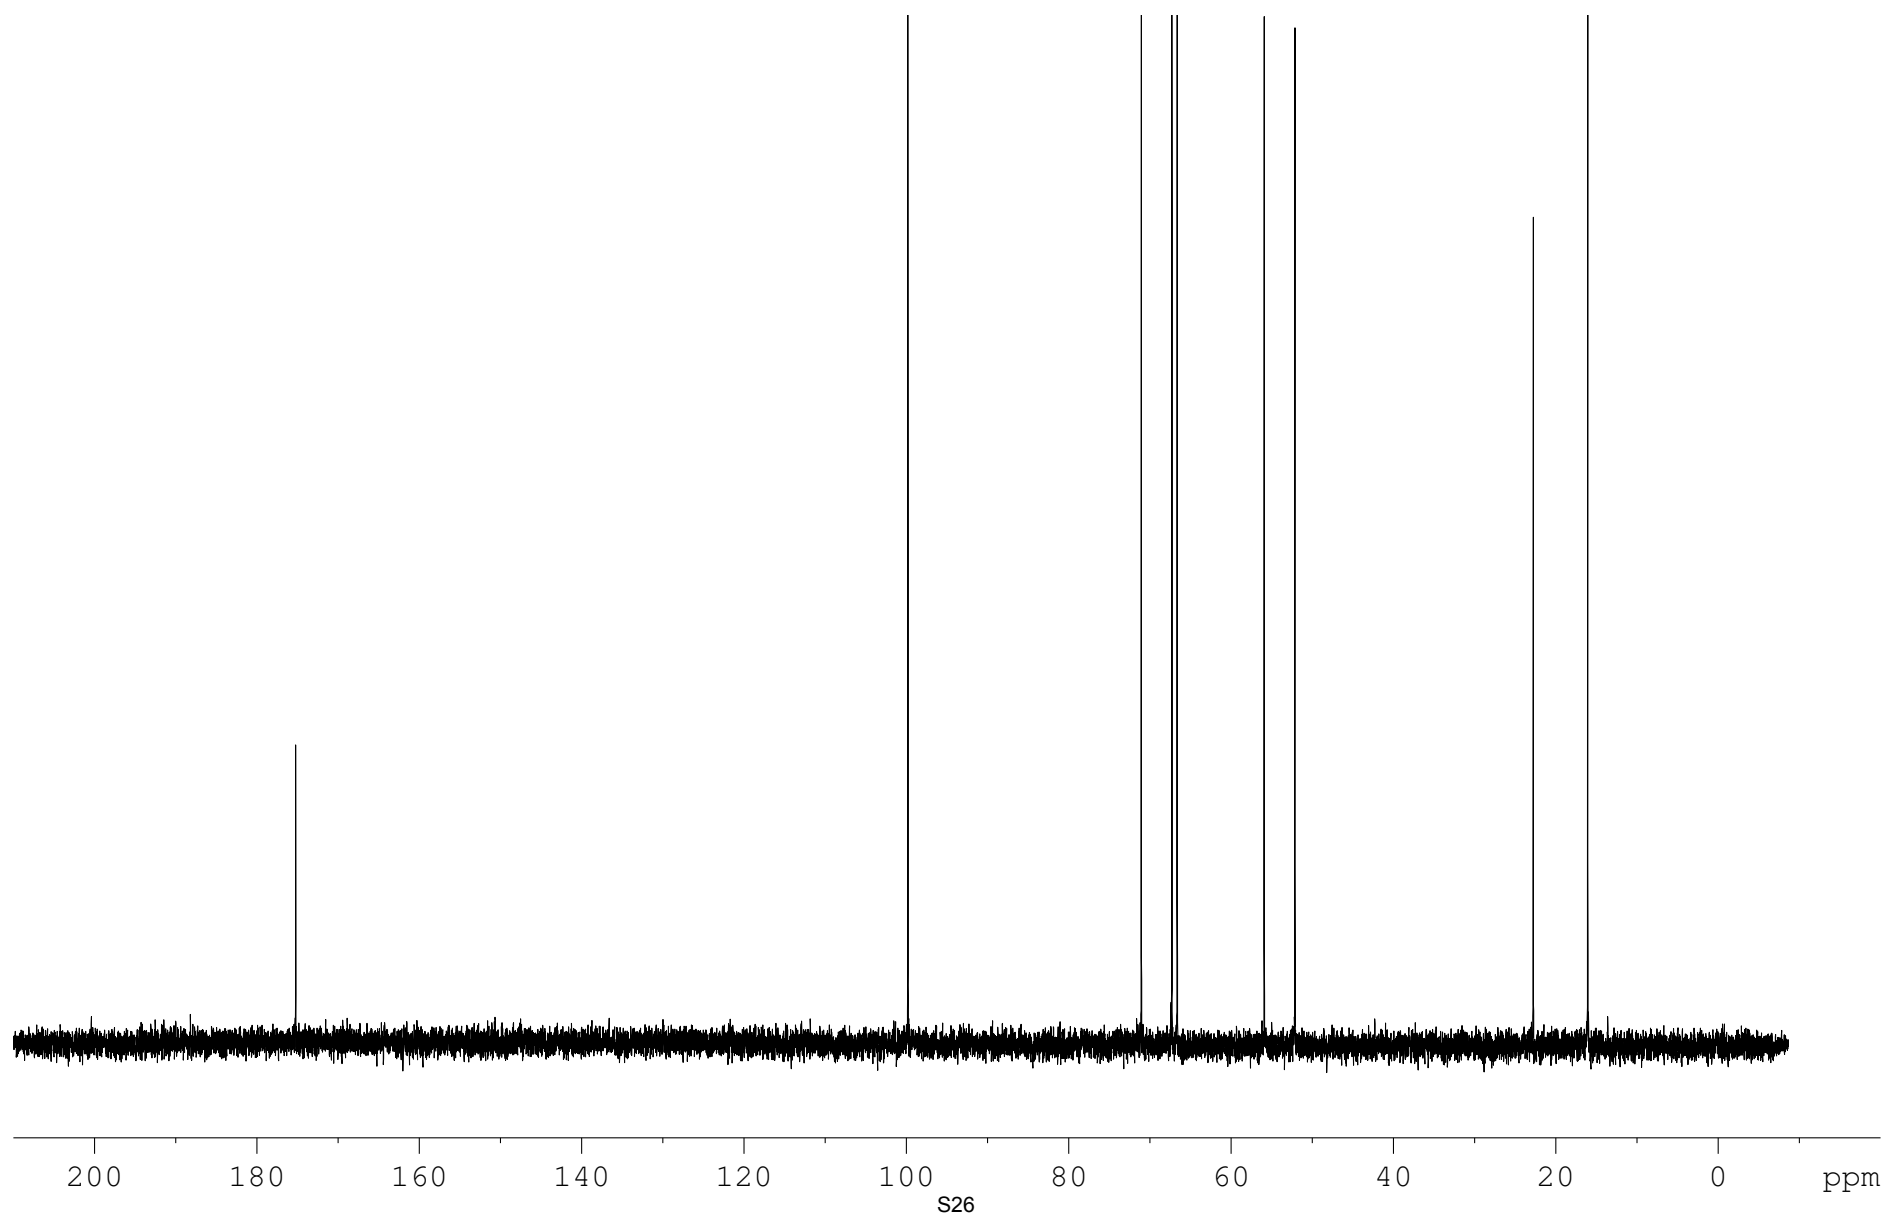

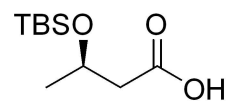

**16**

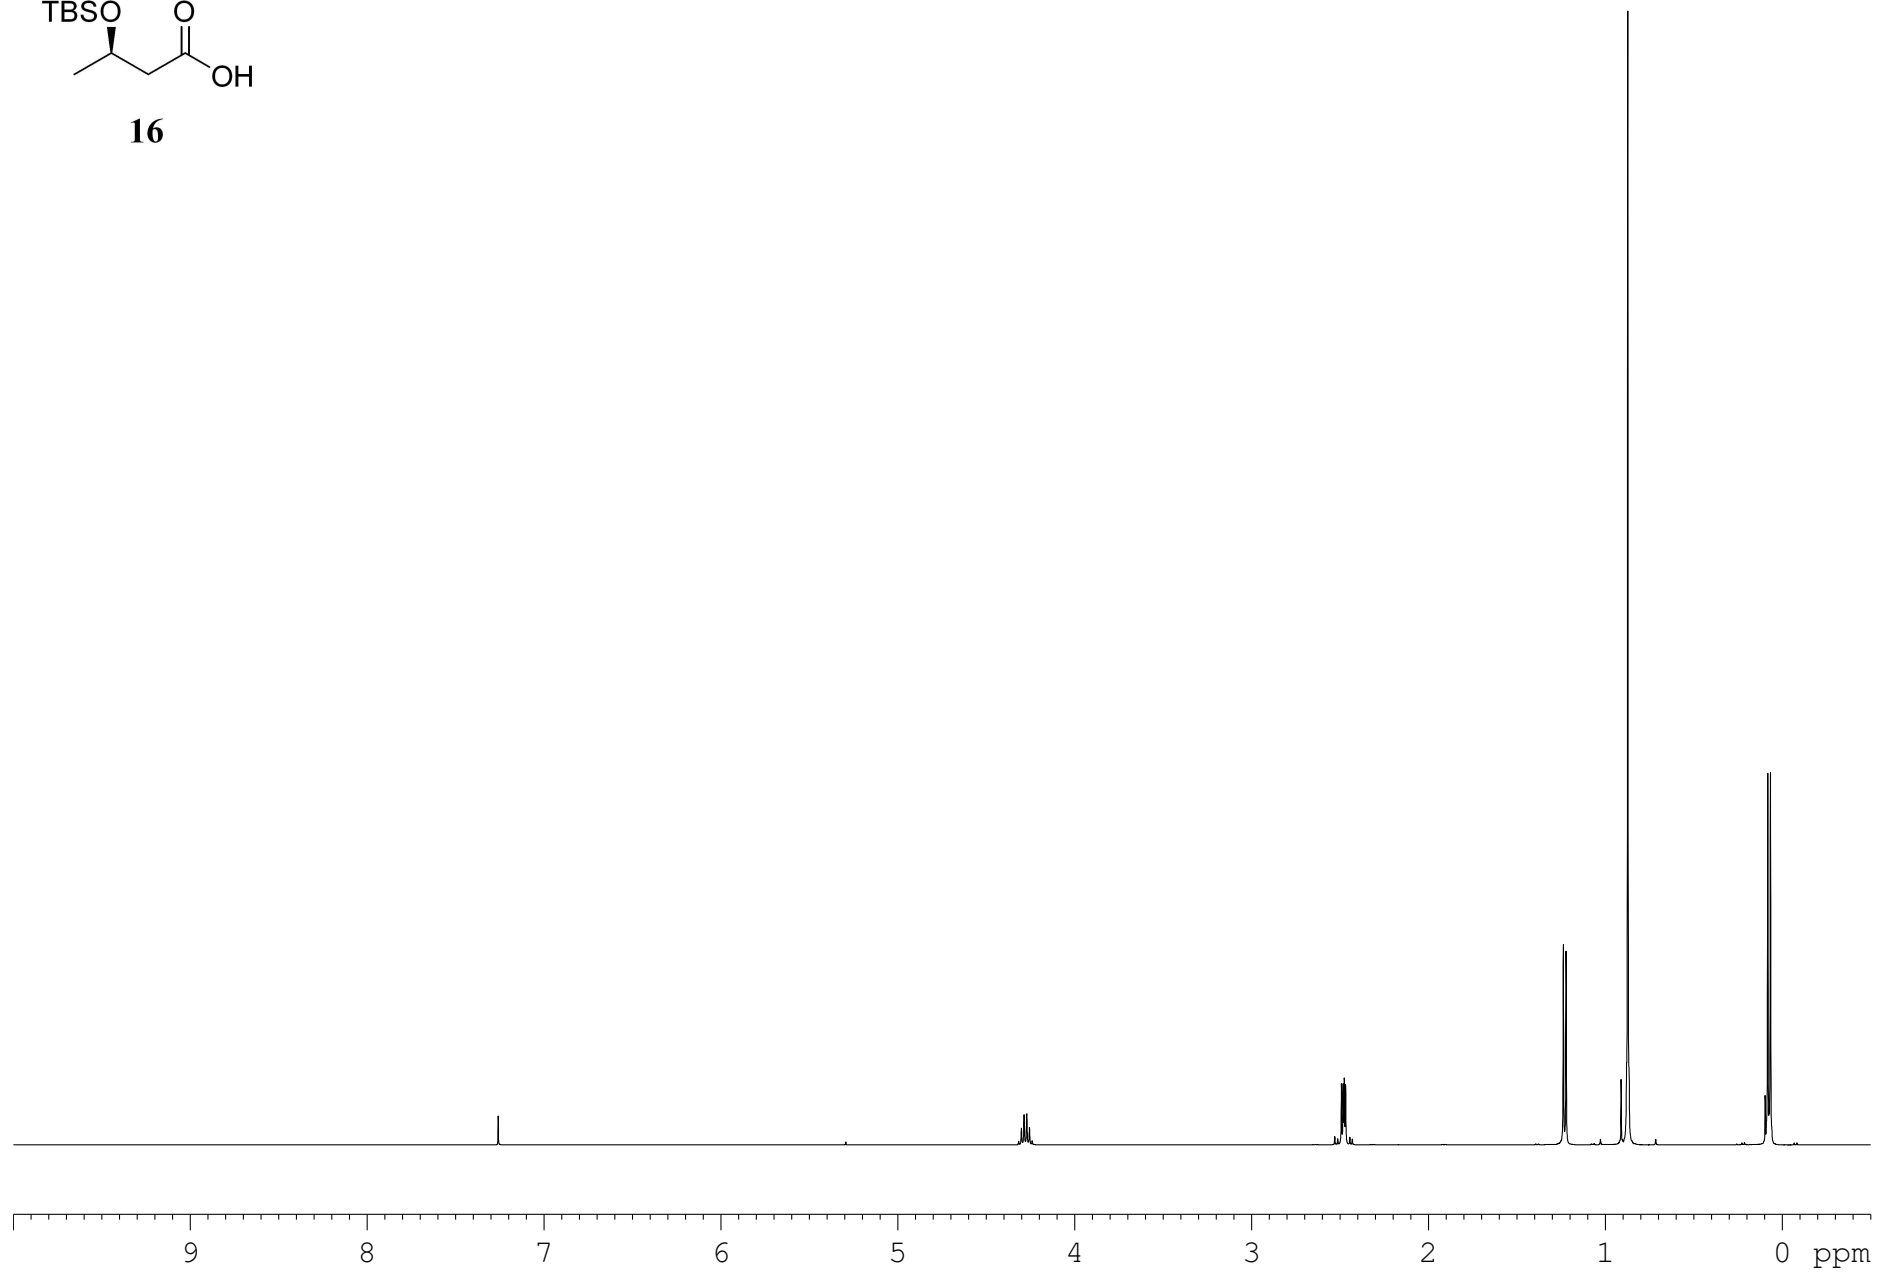

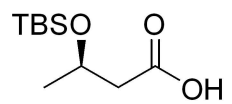

**16**

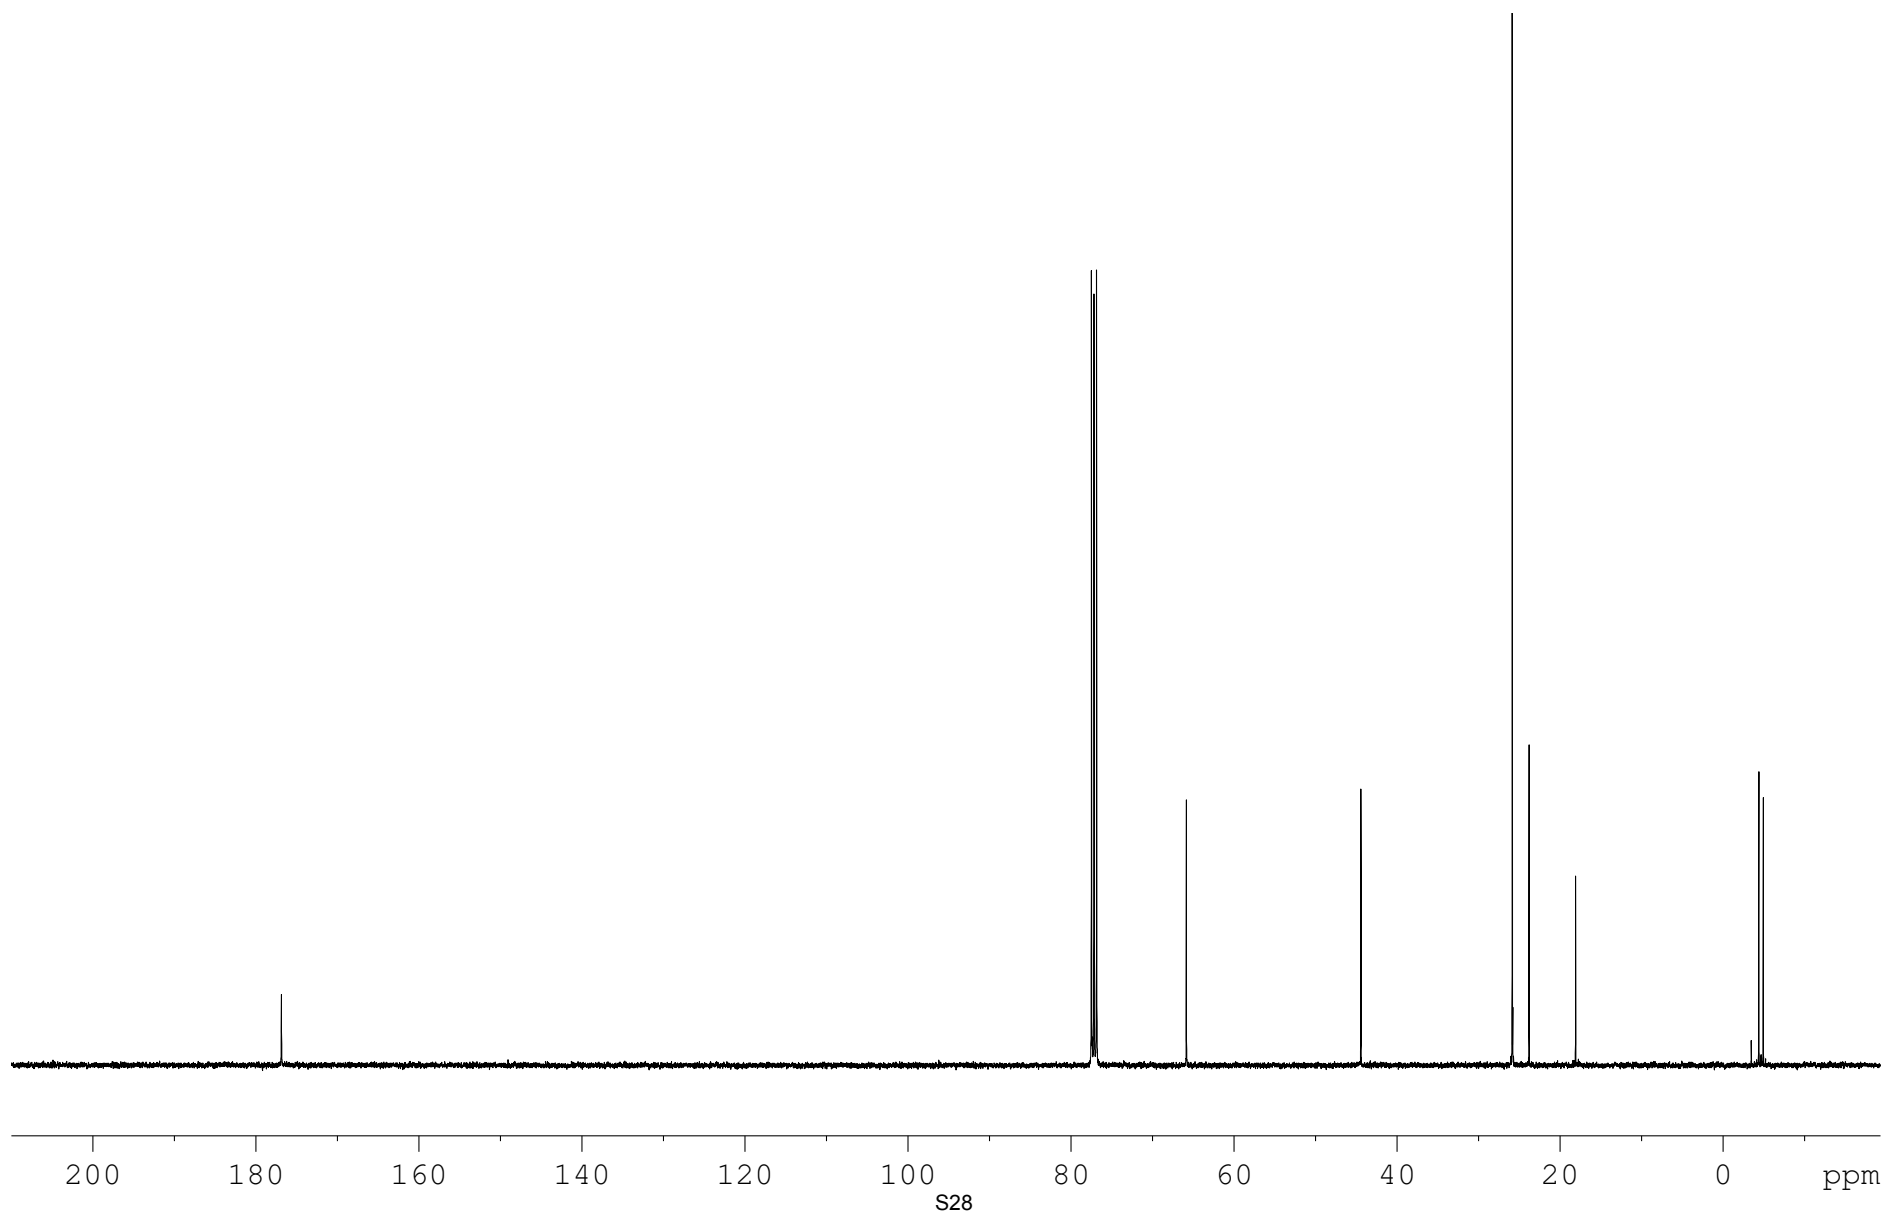

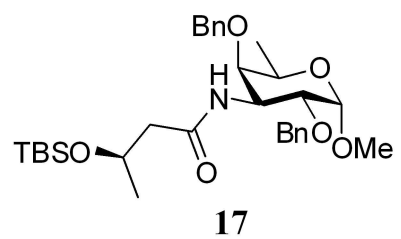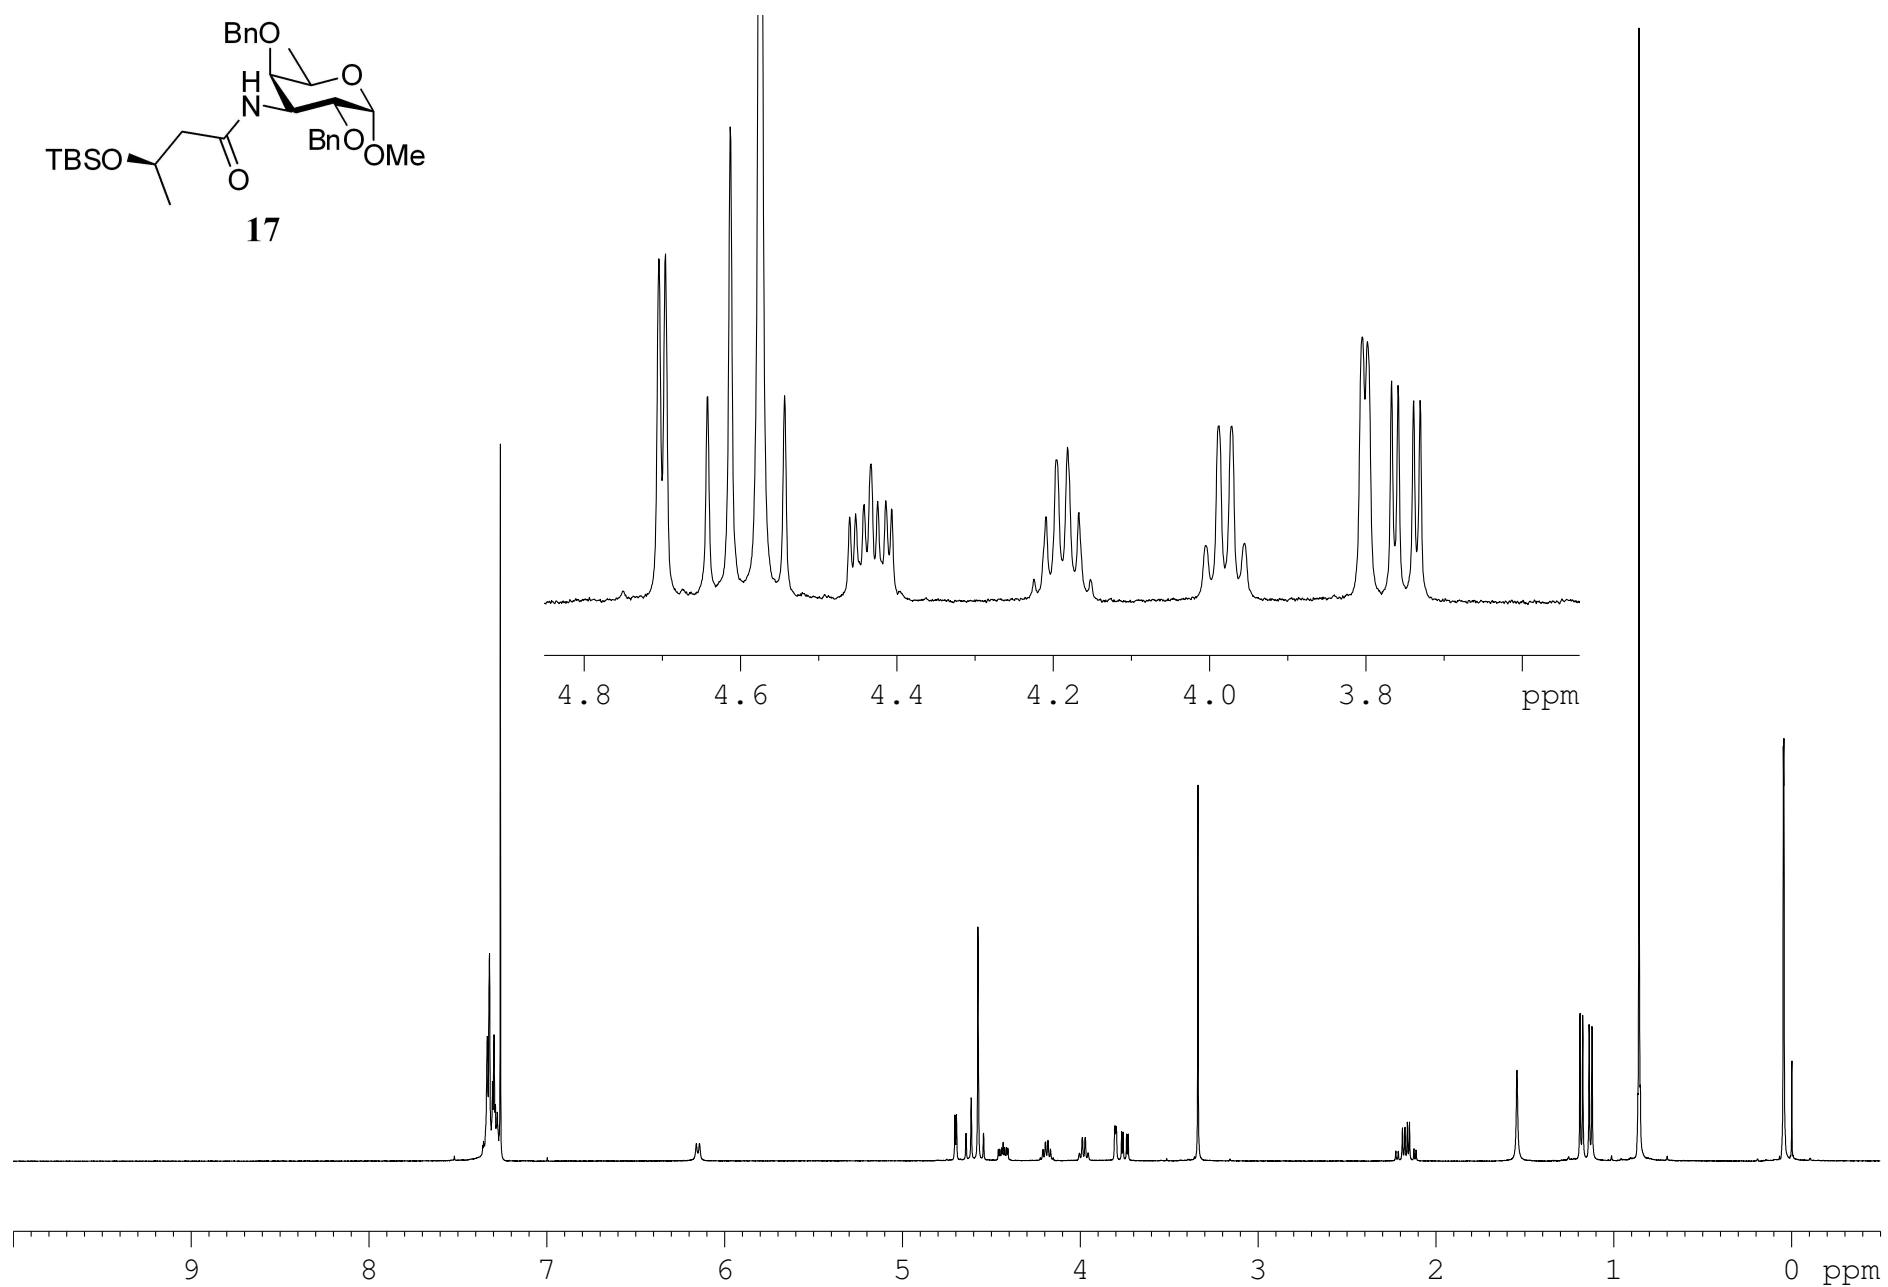

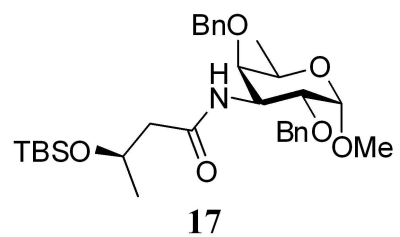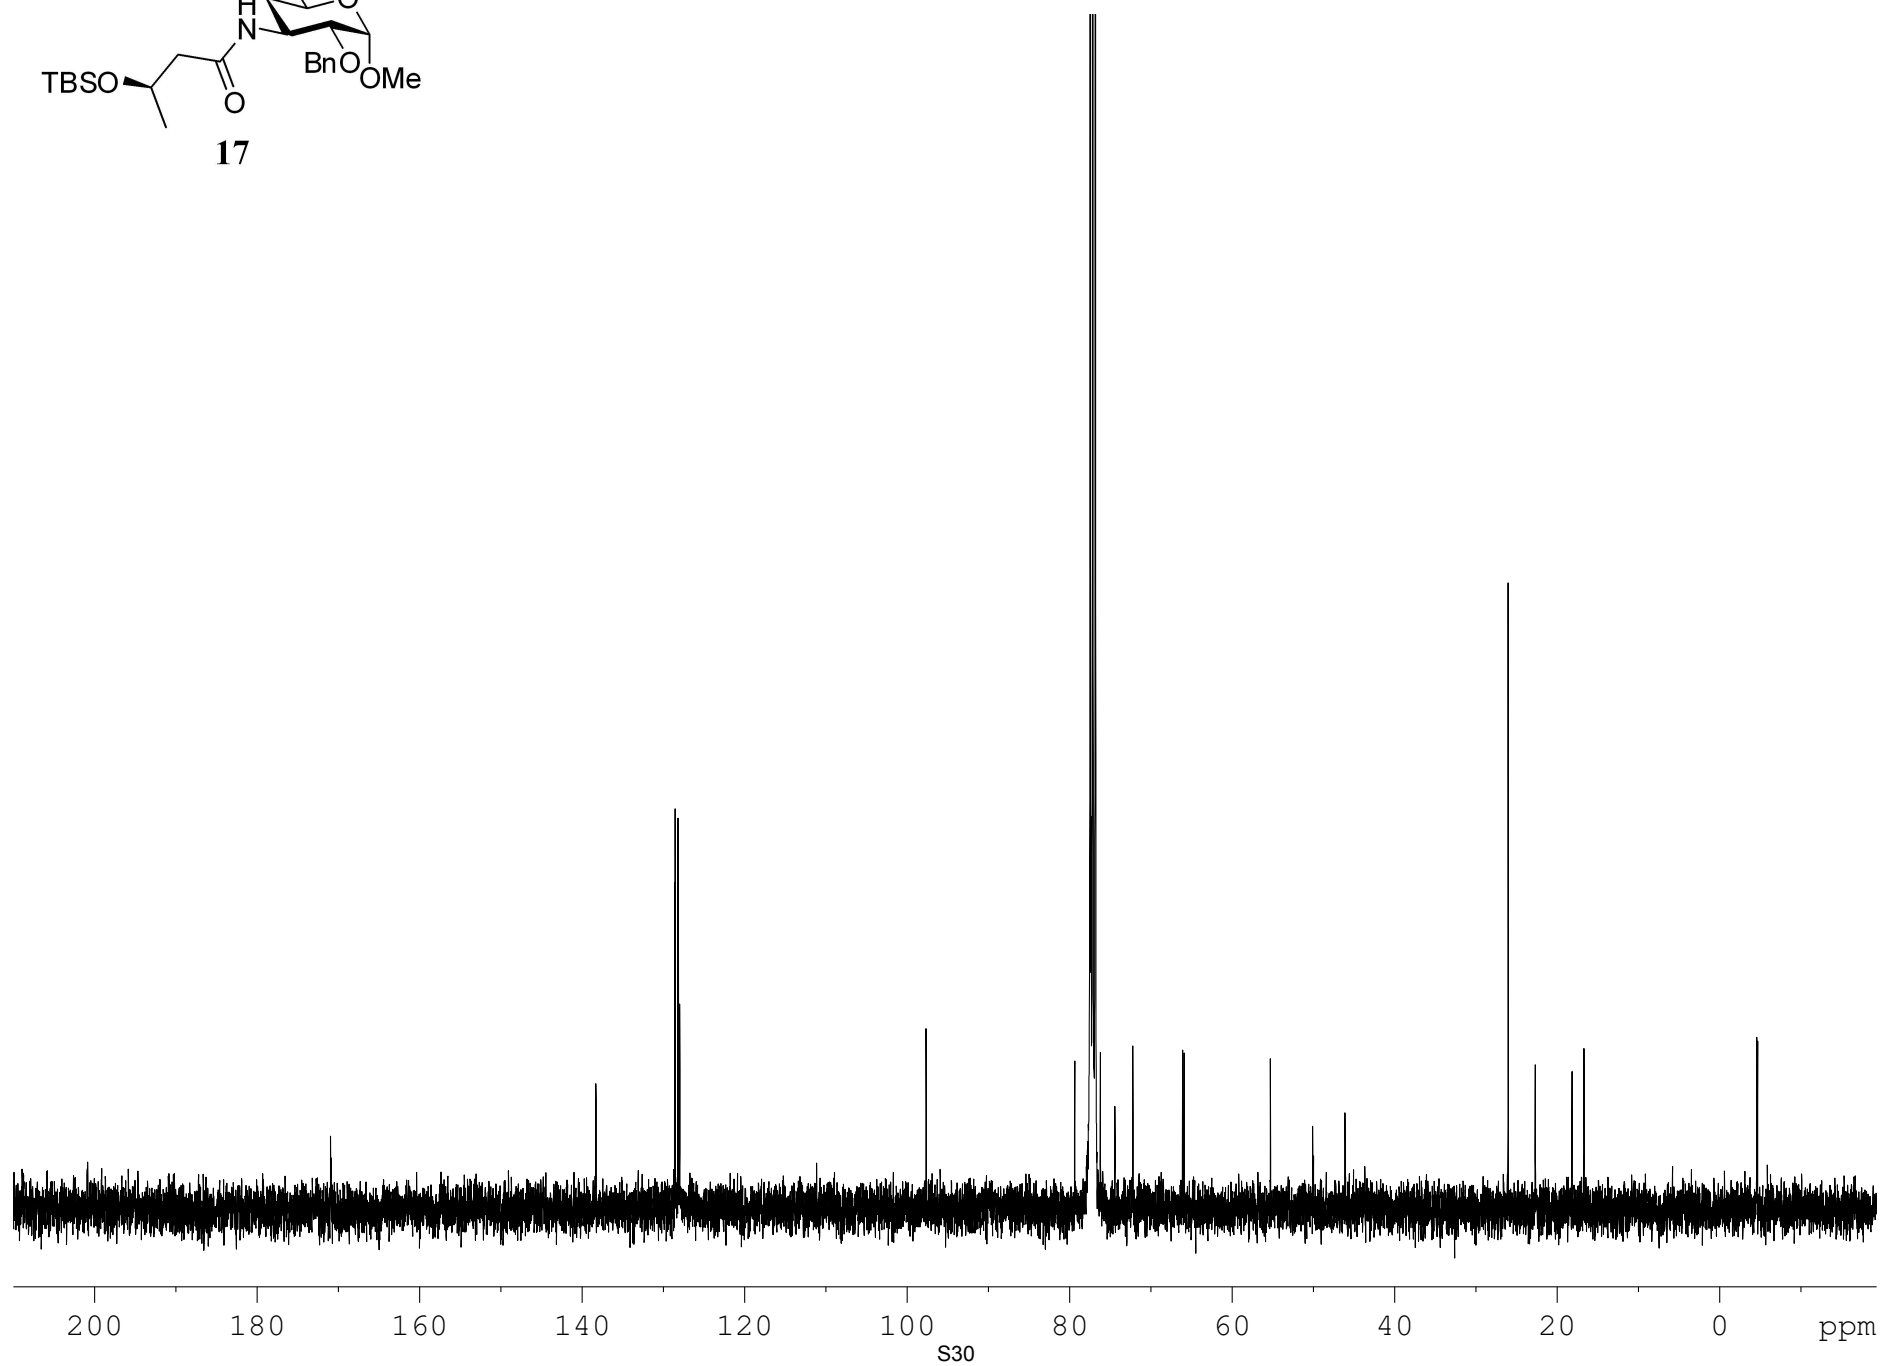

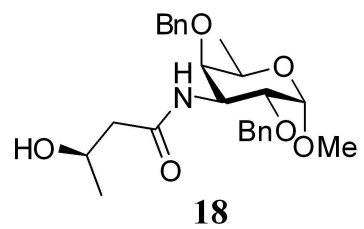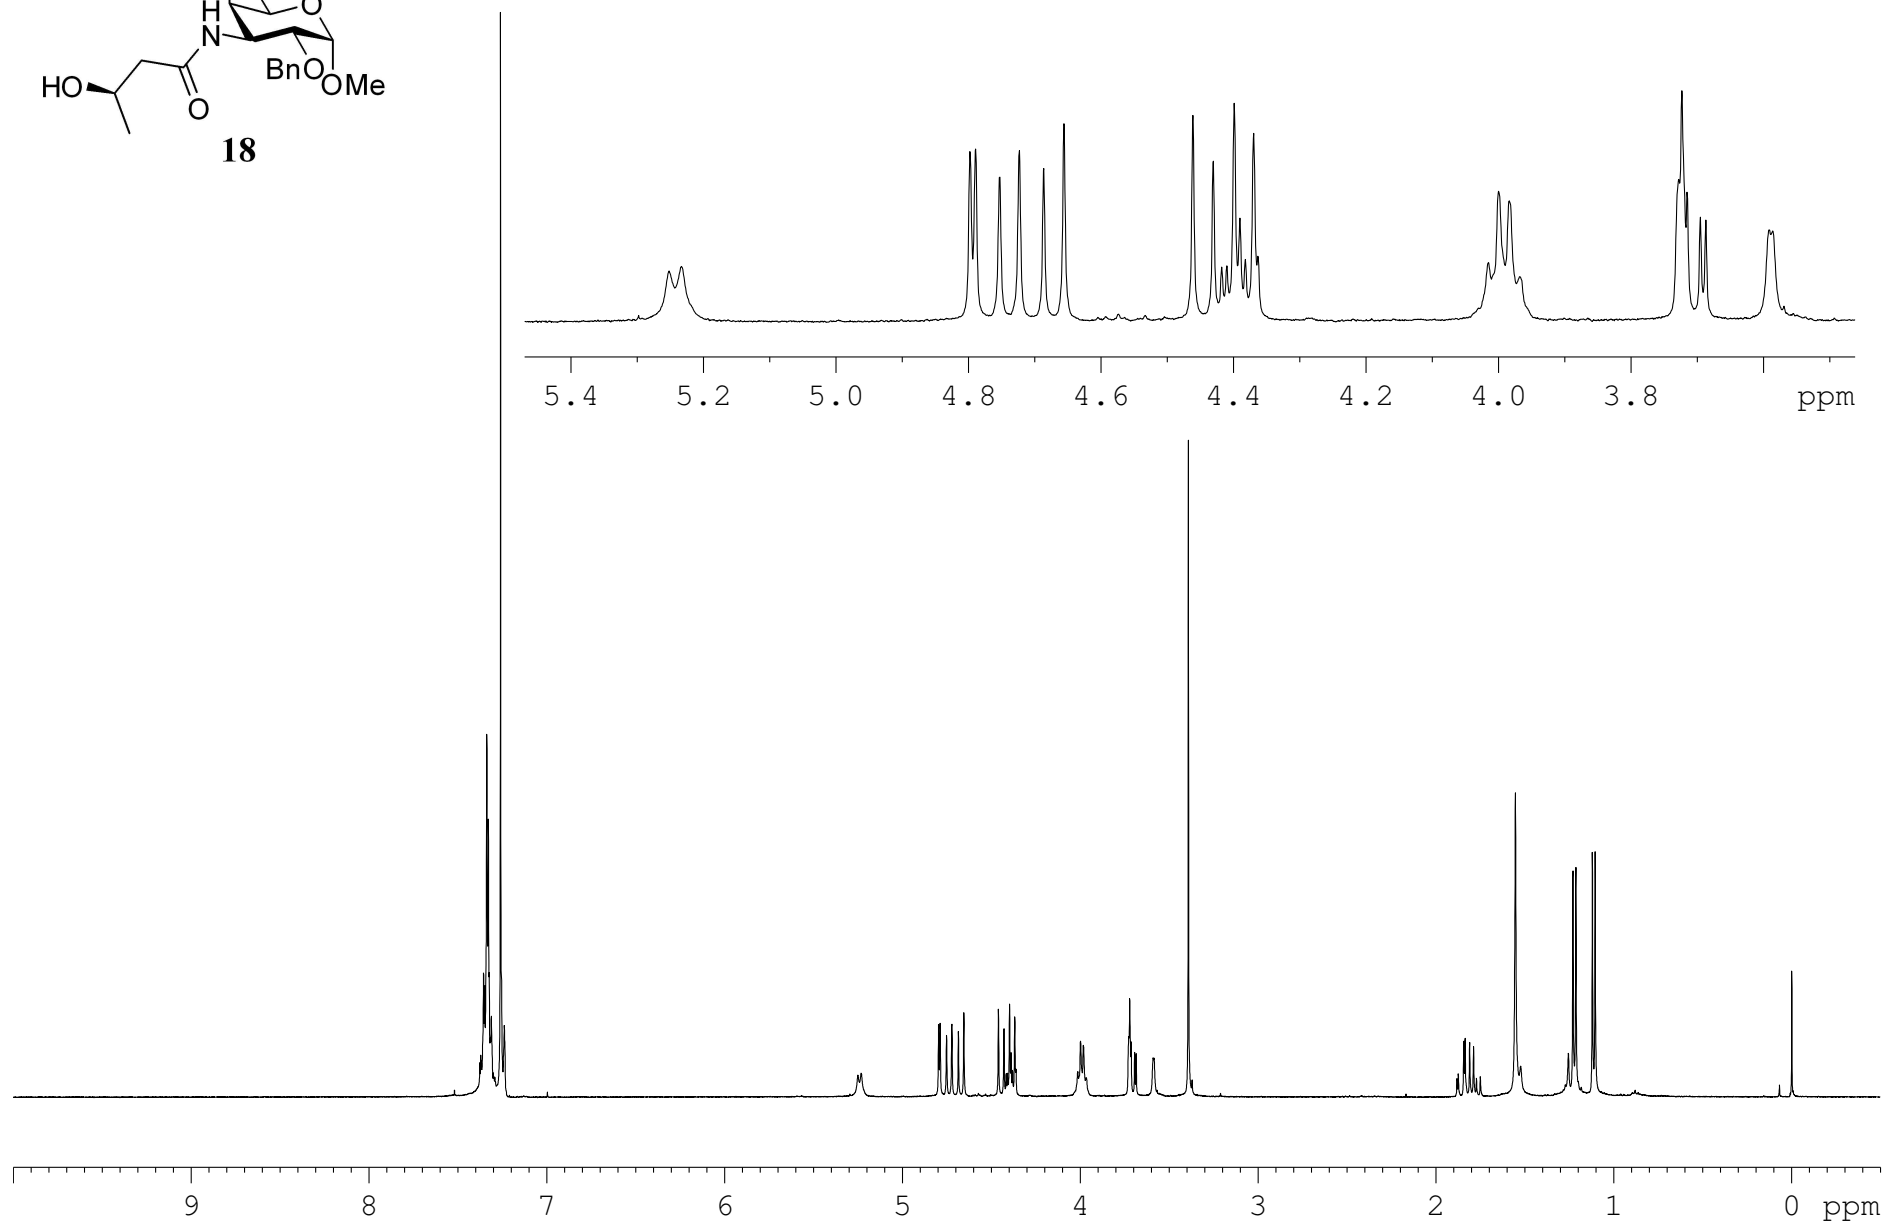



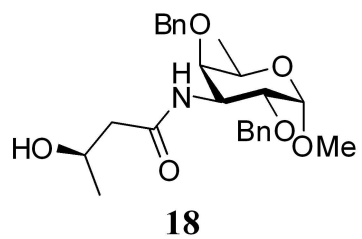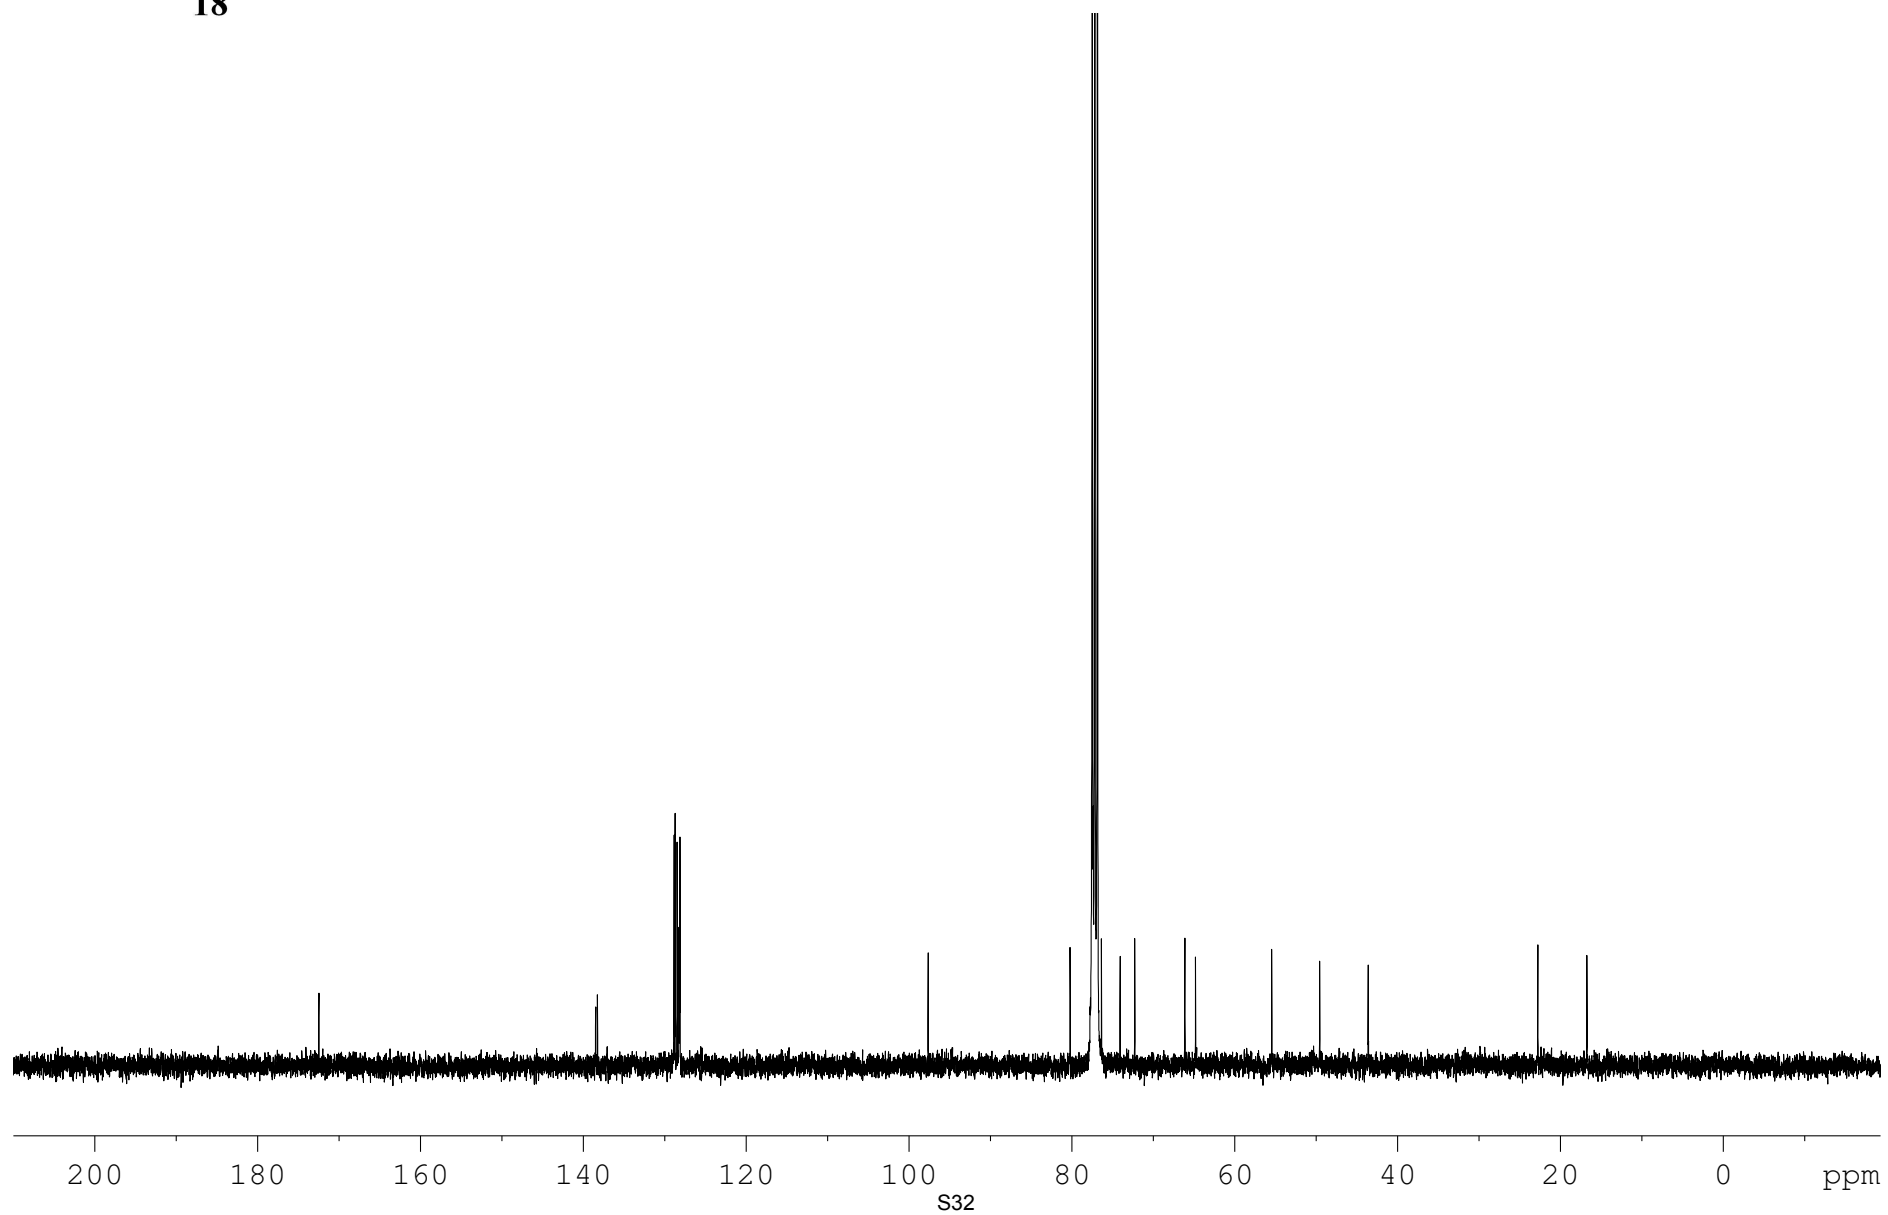

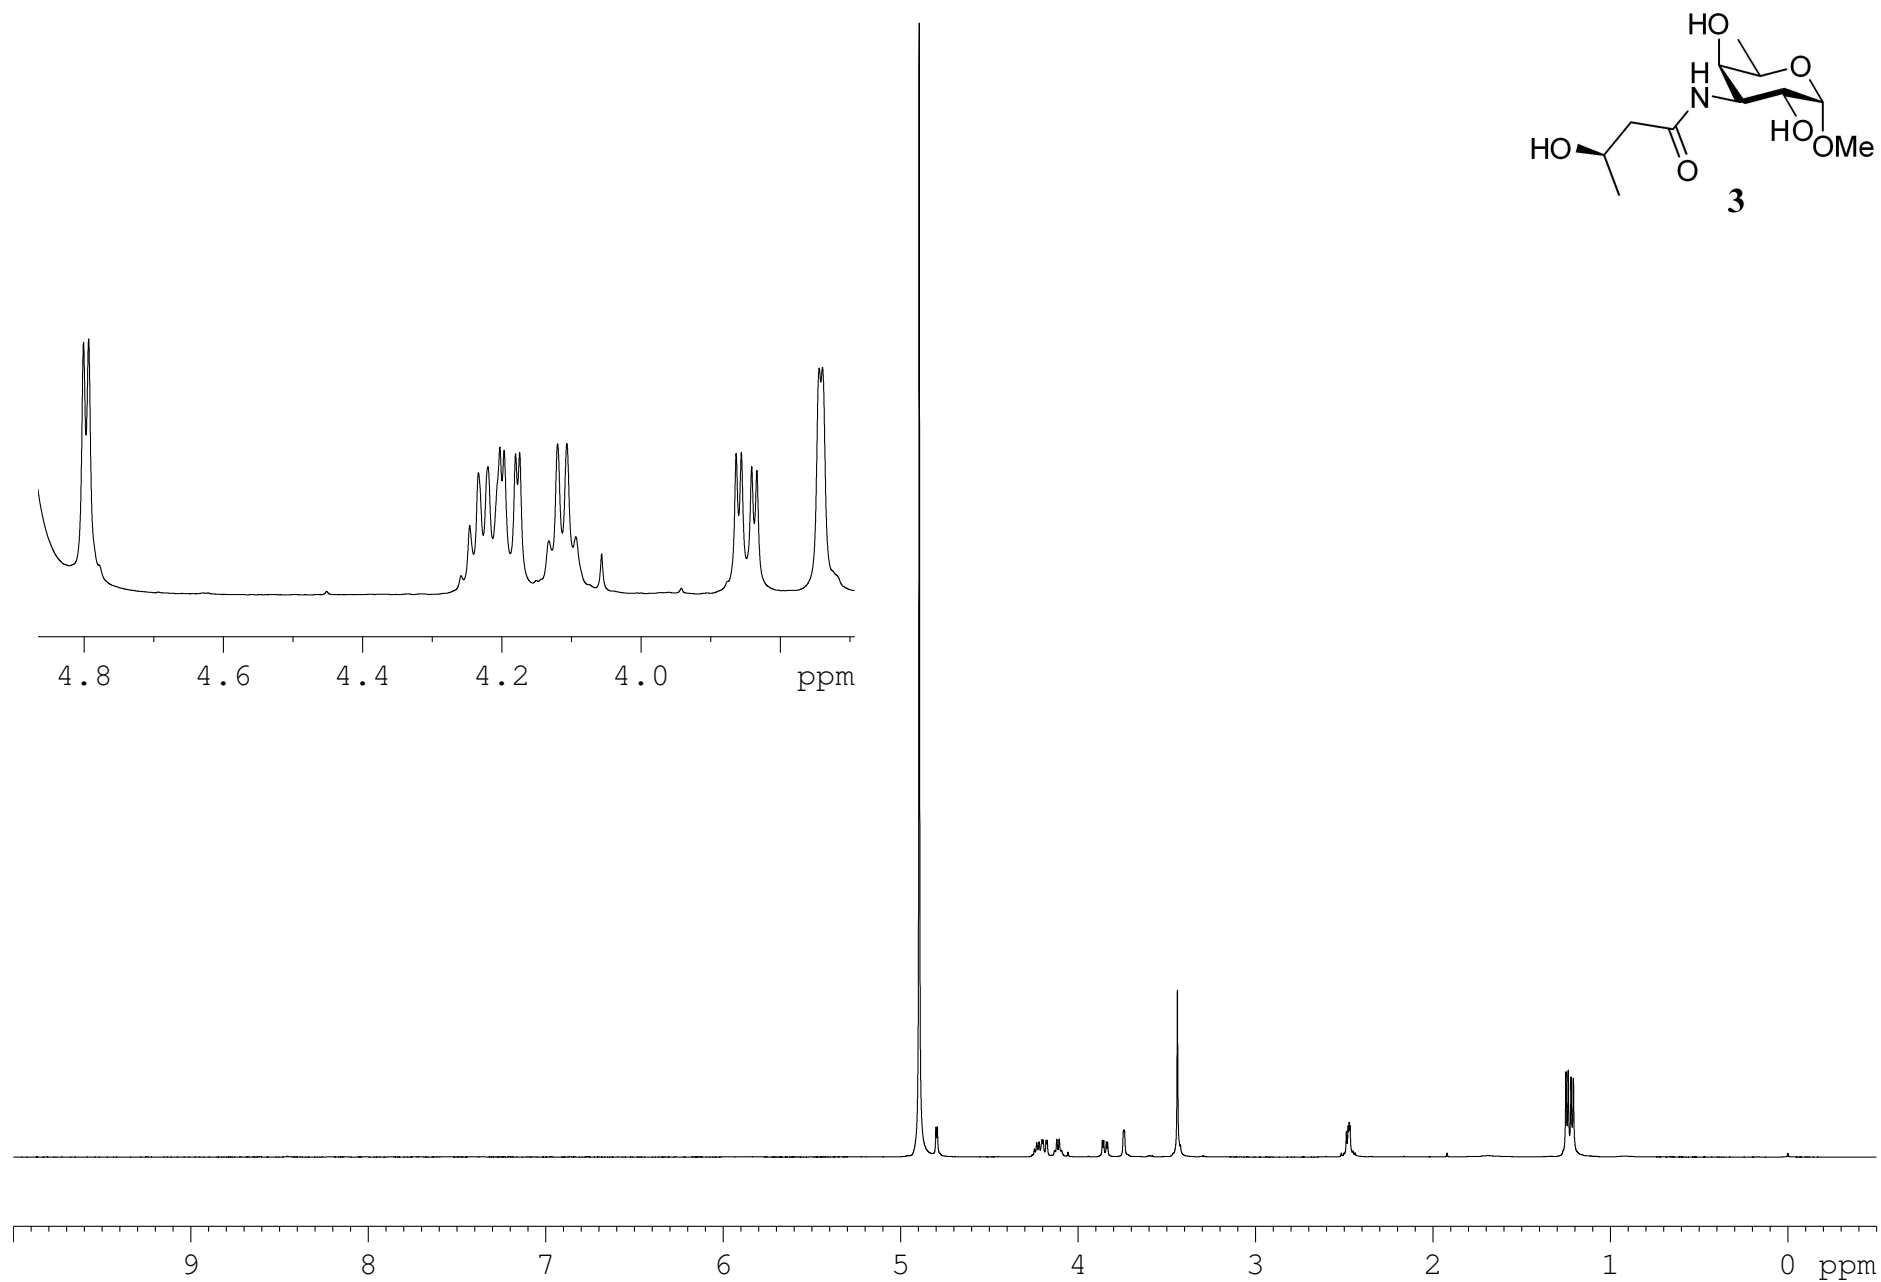

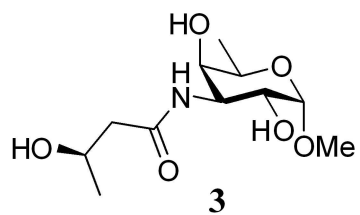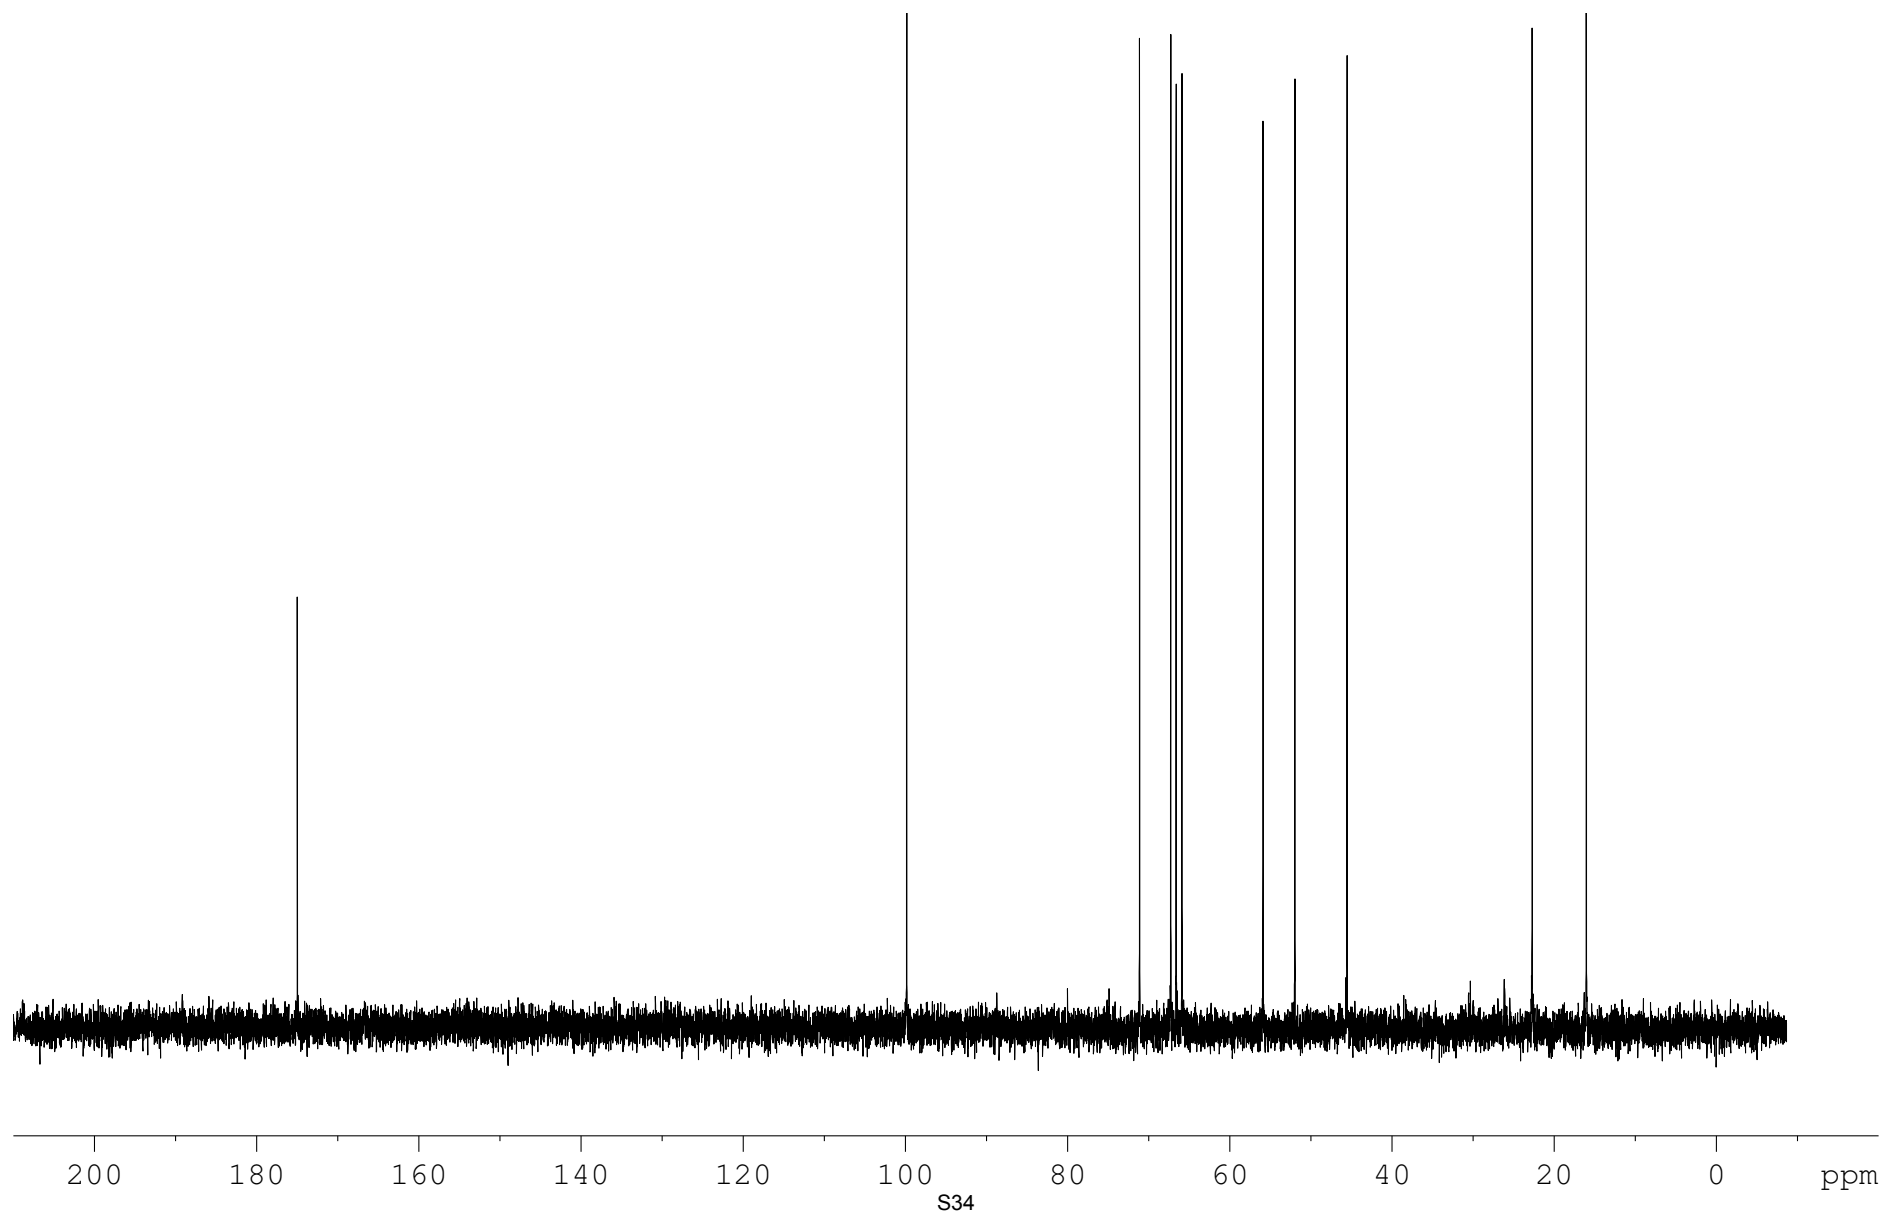

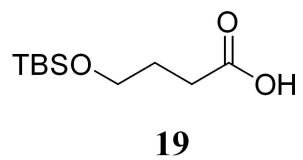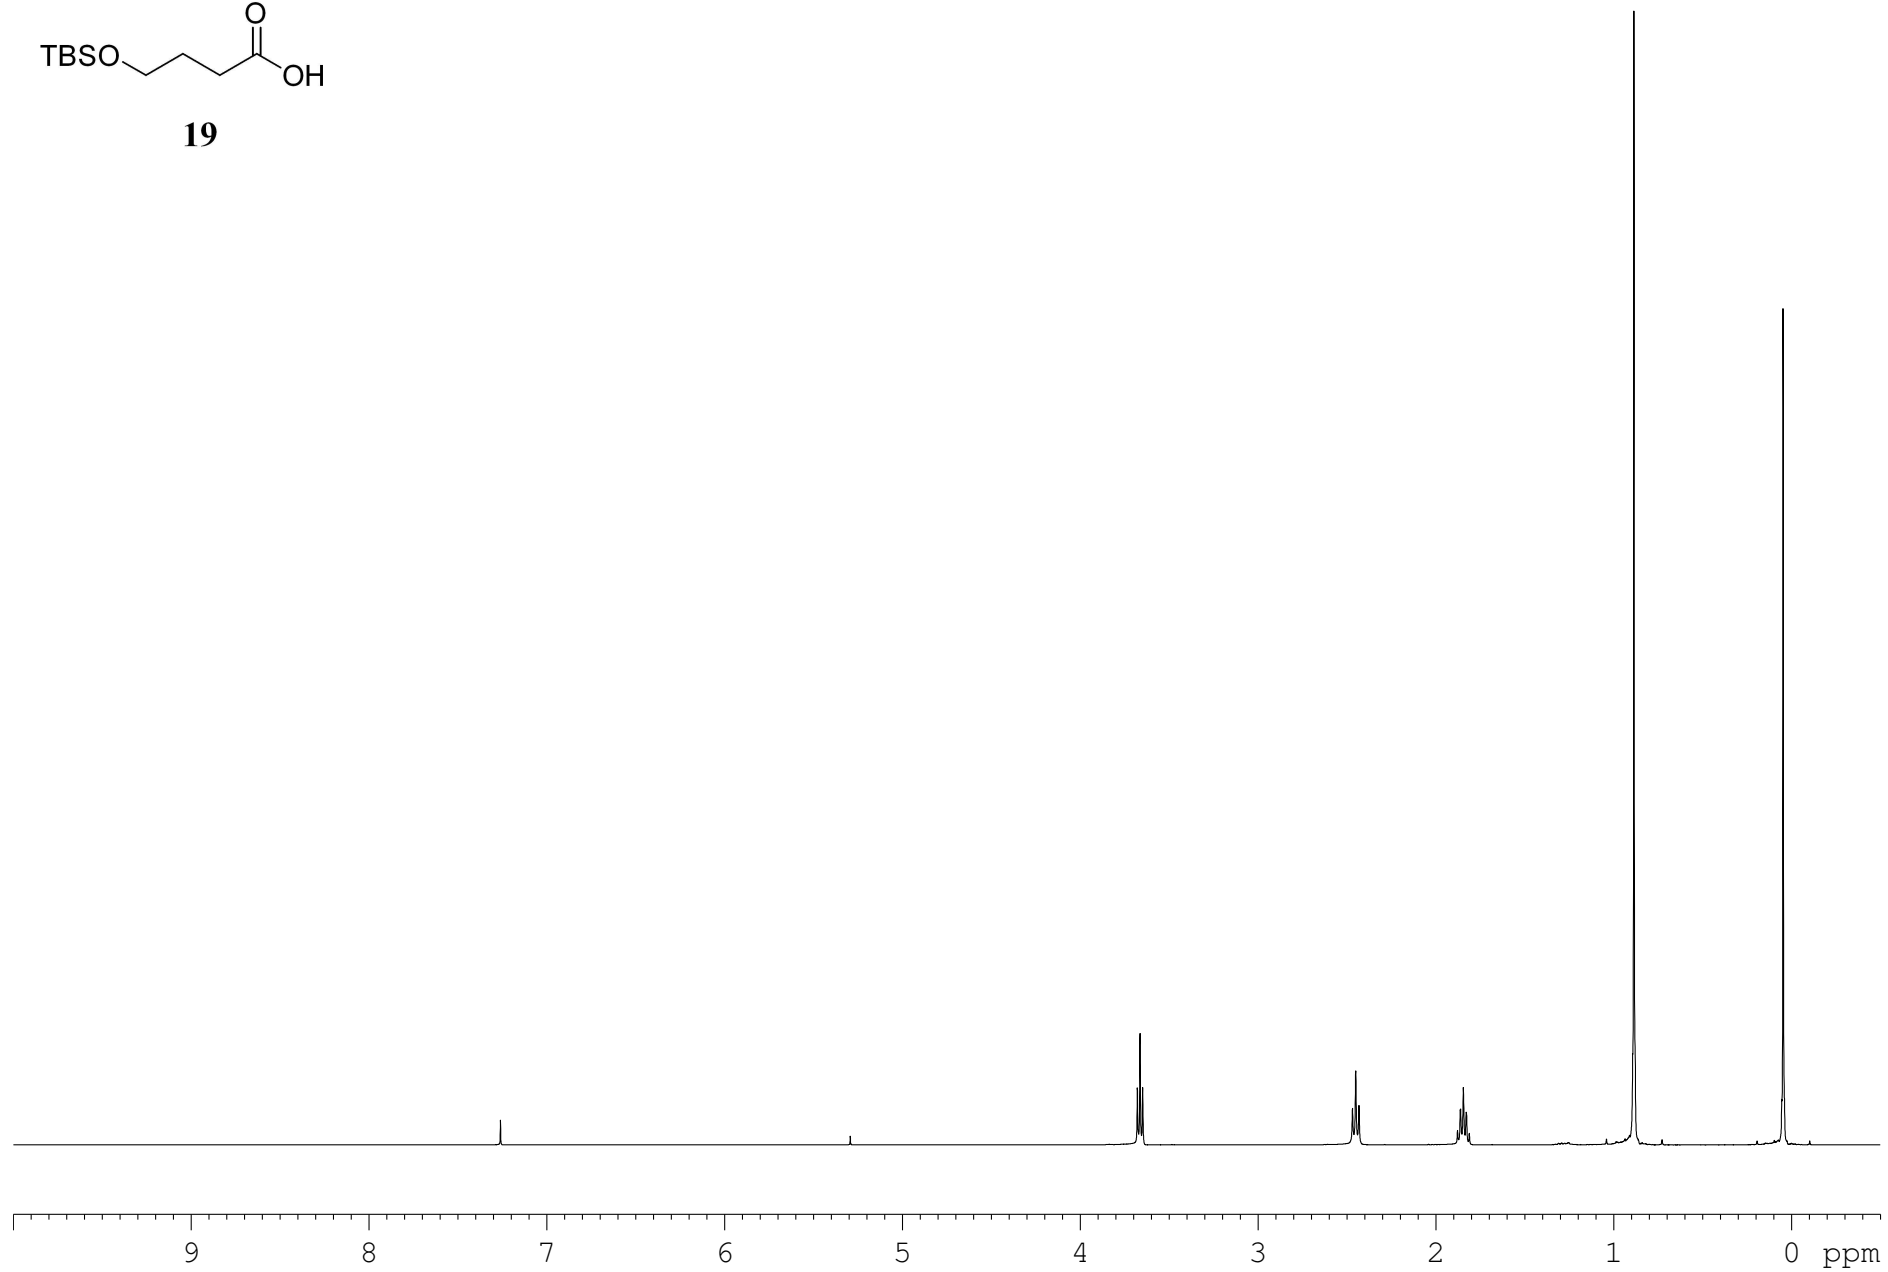

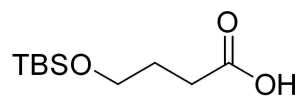

**19**

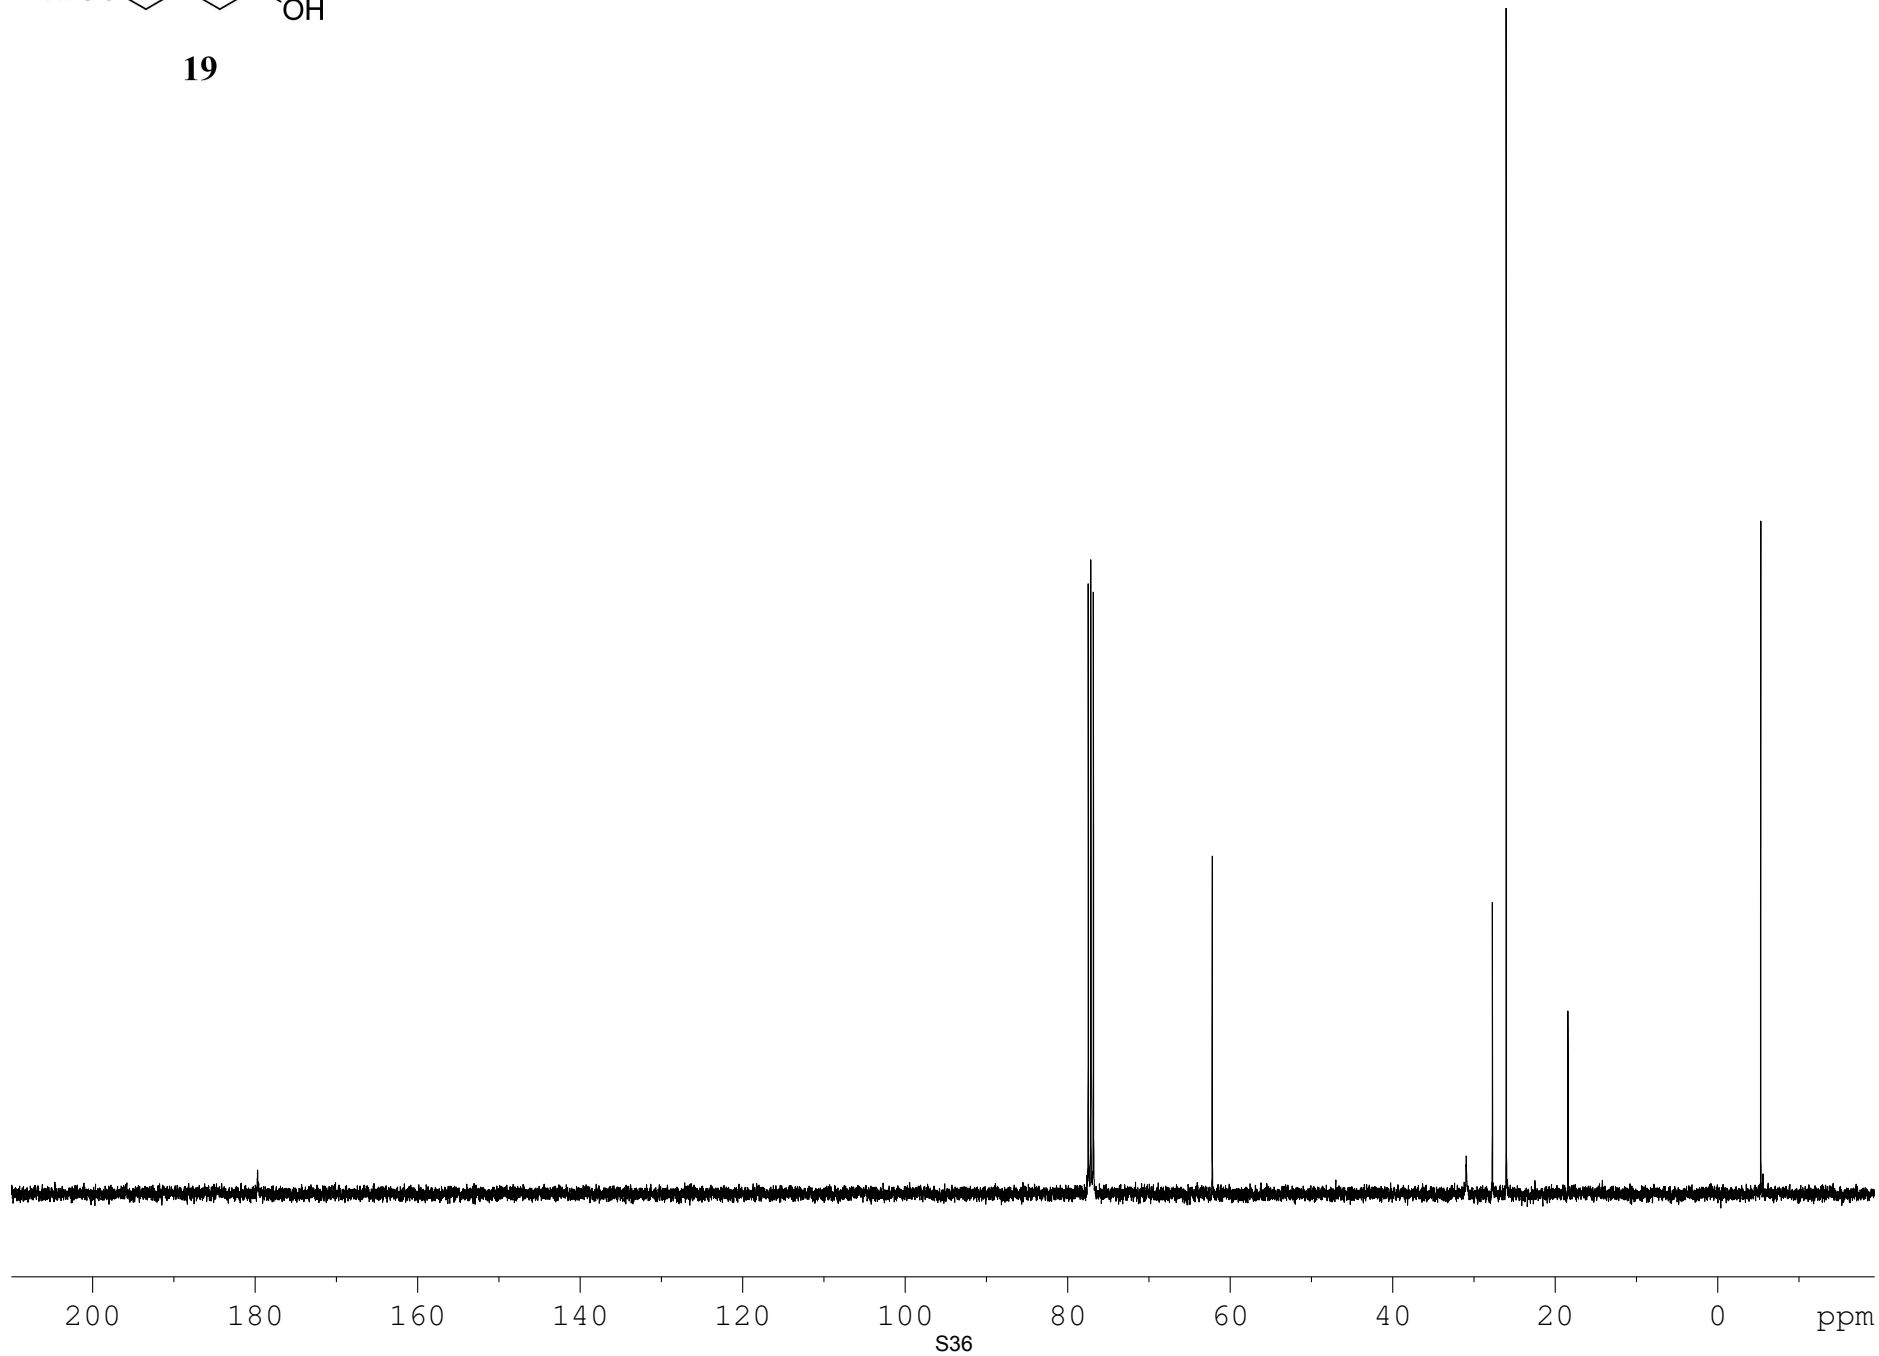

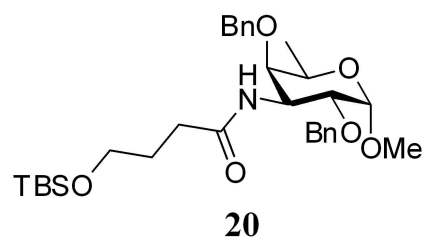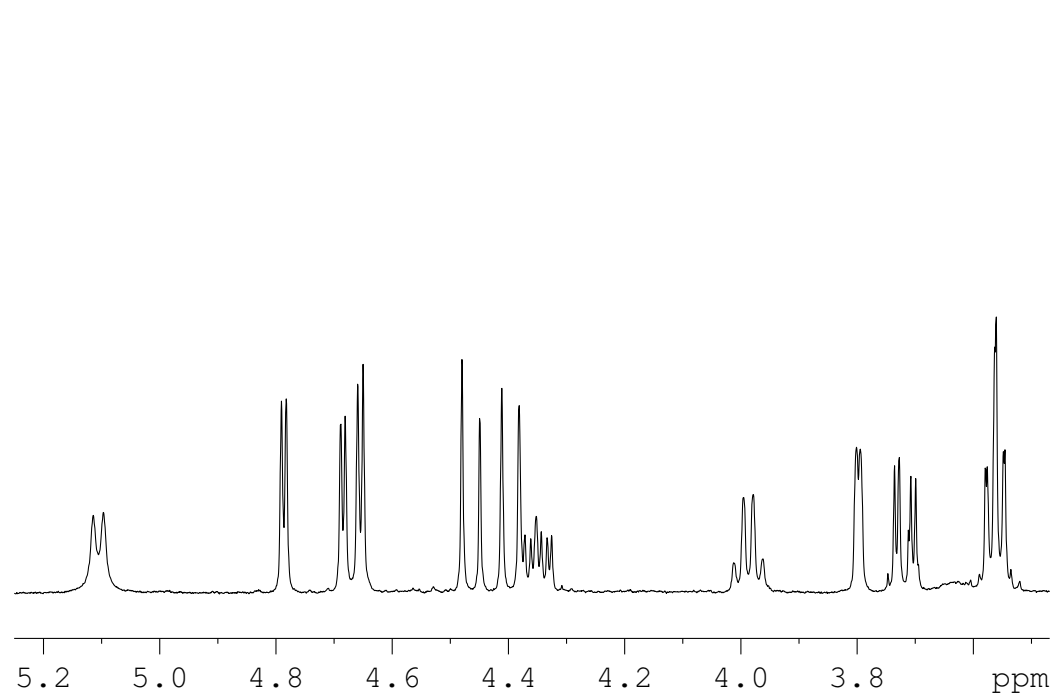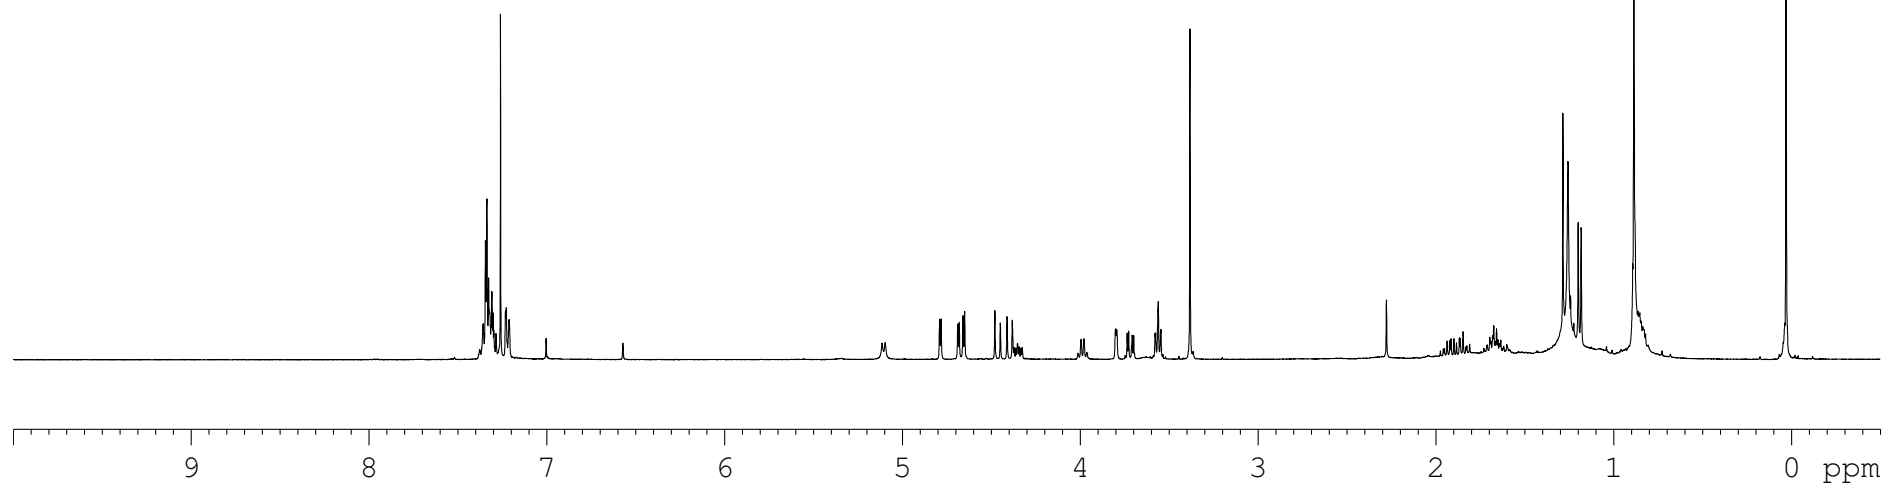

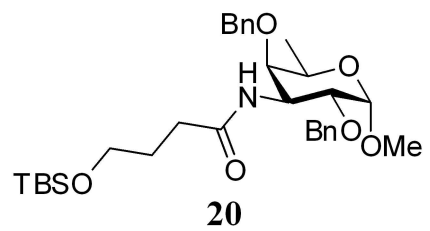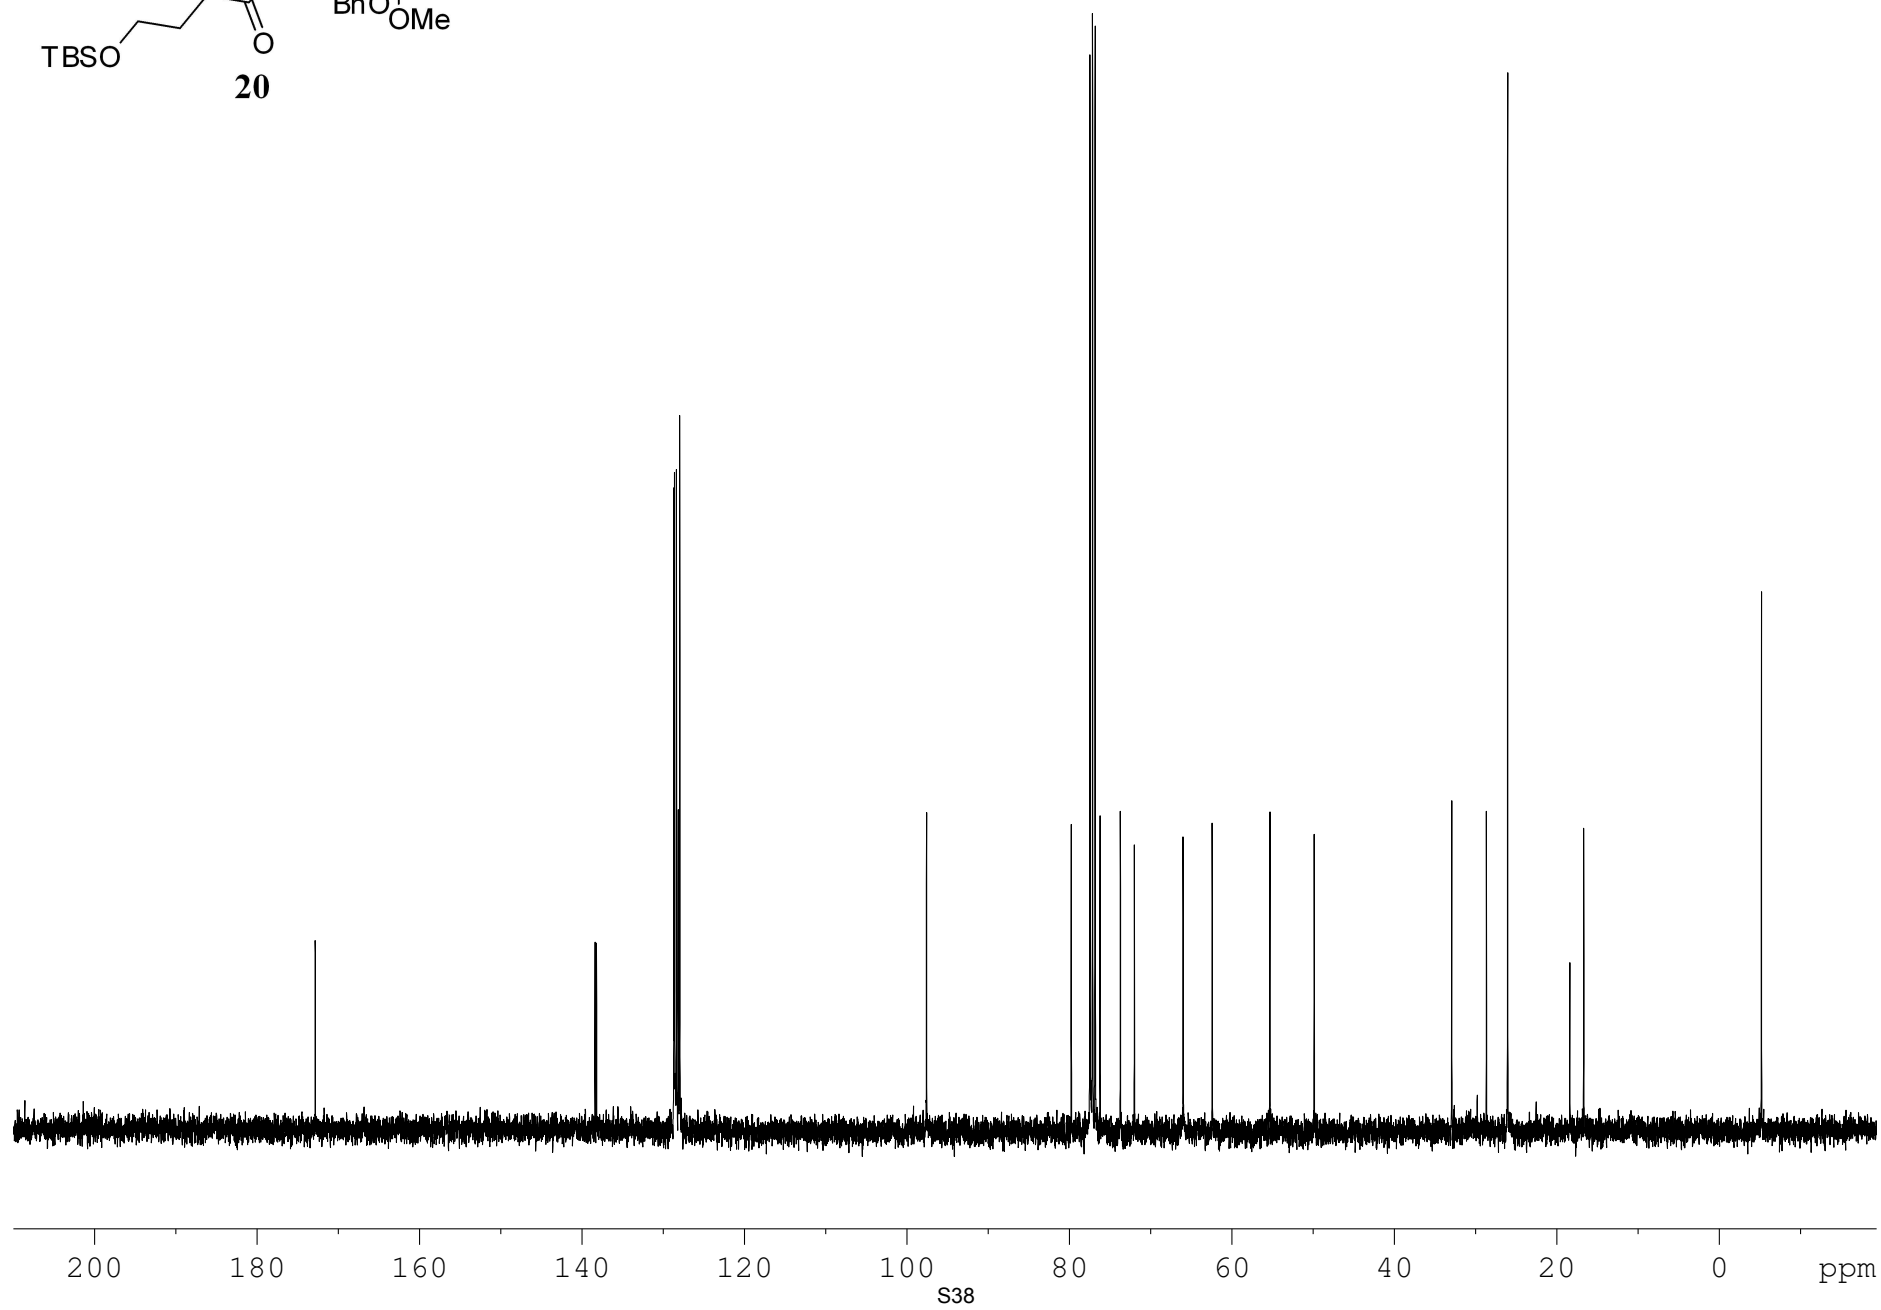

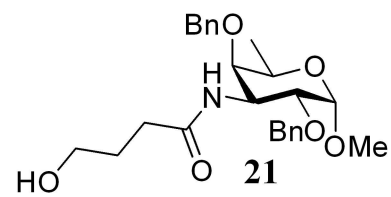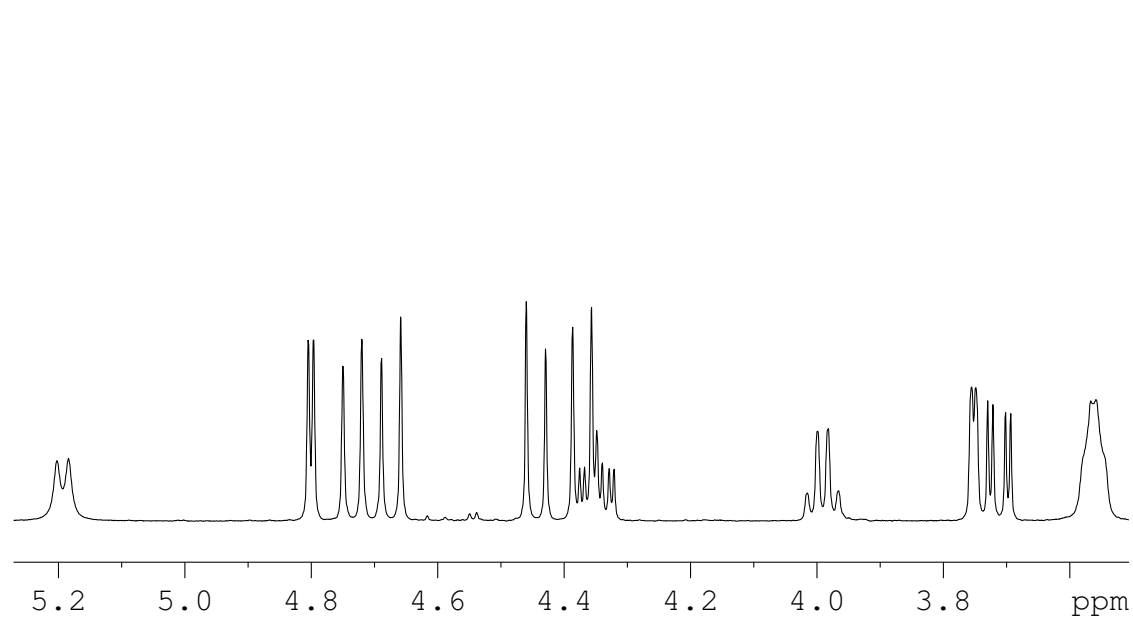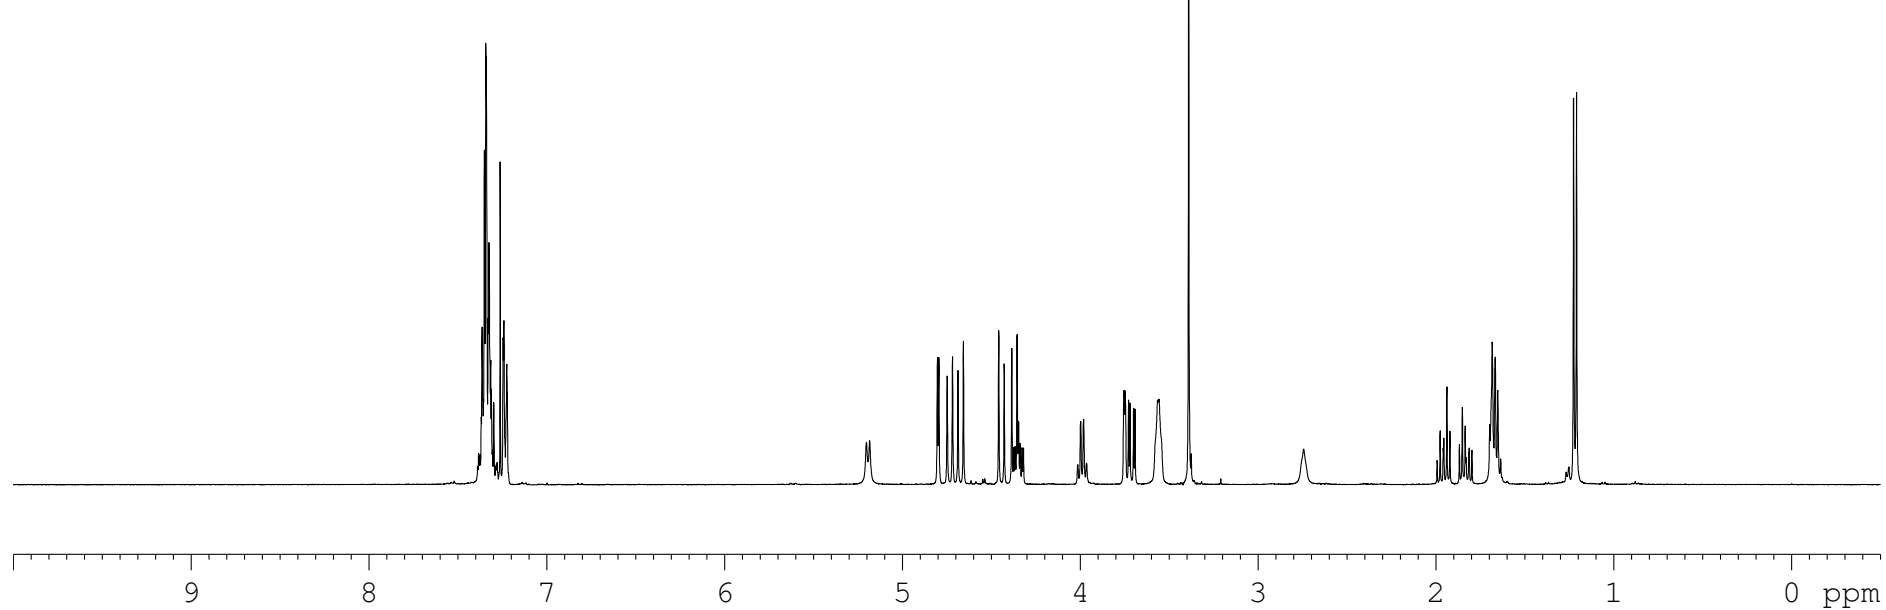



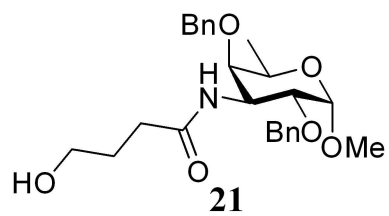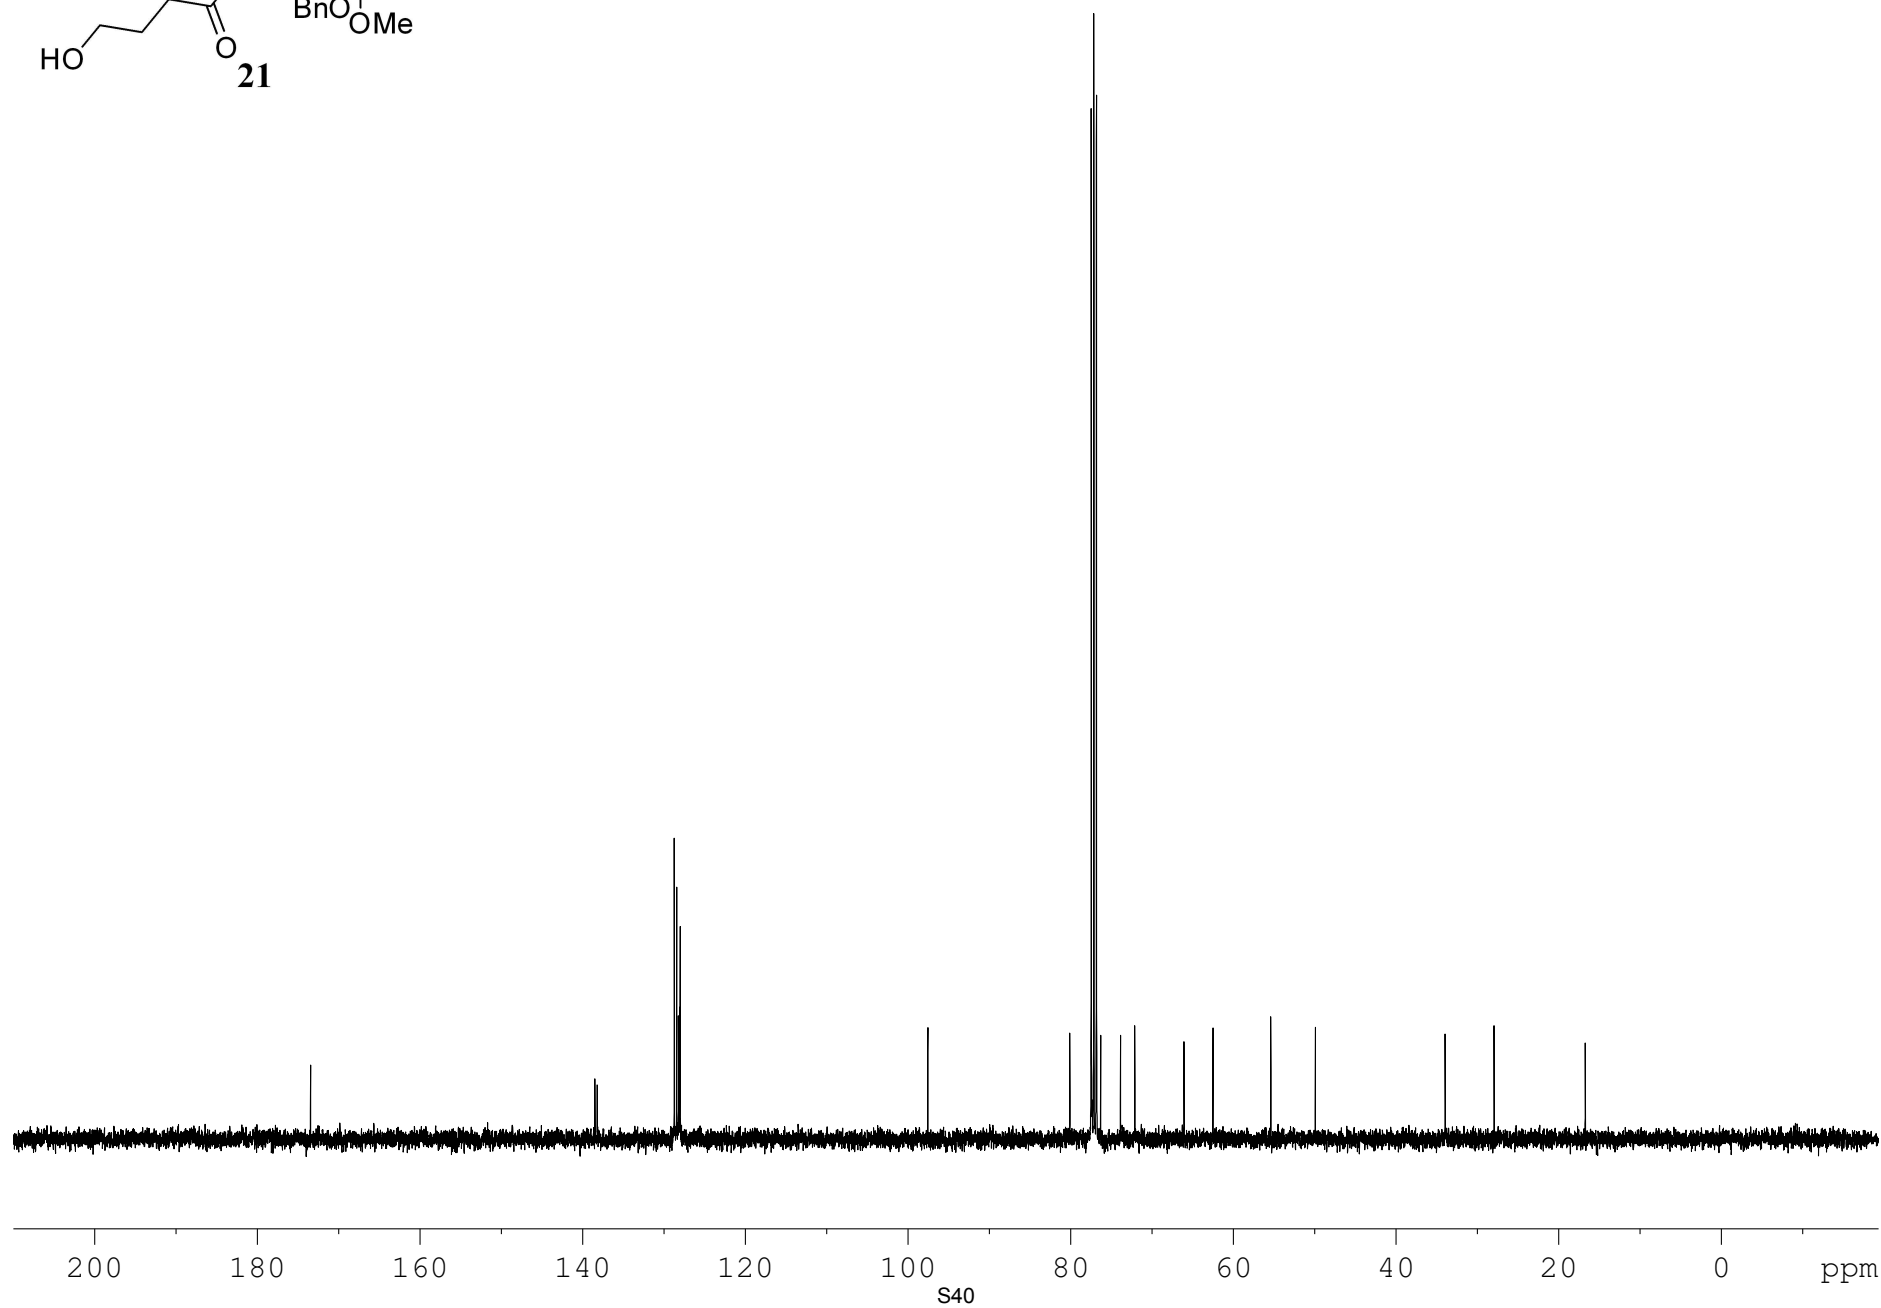

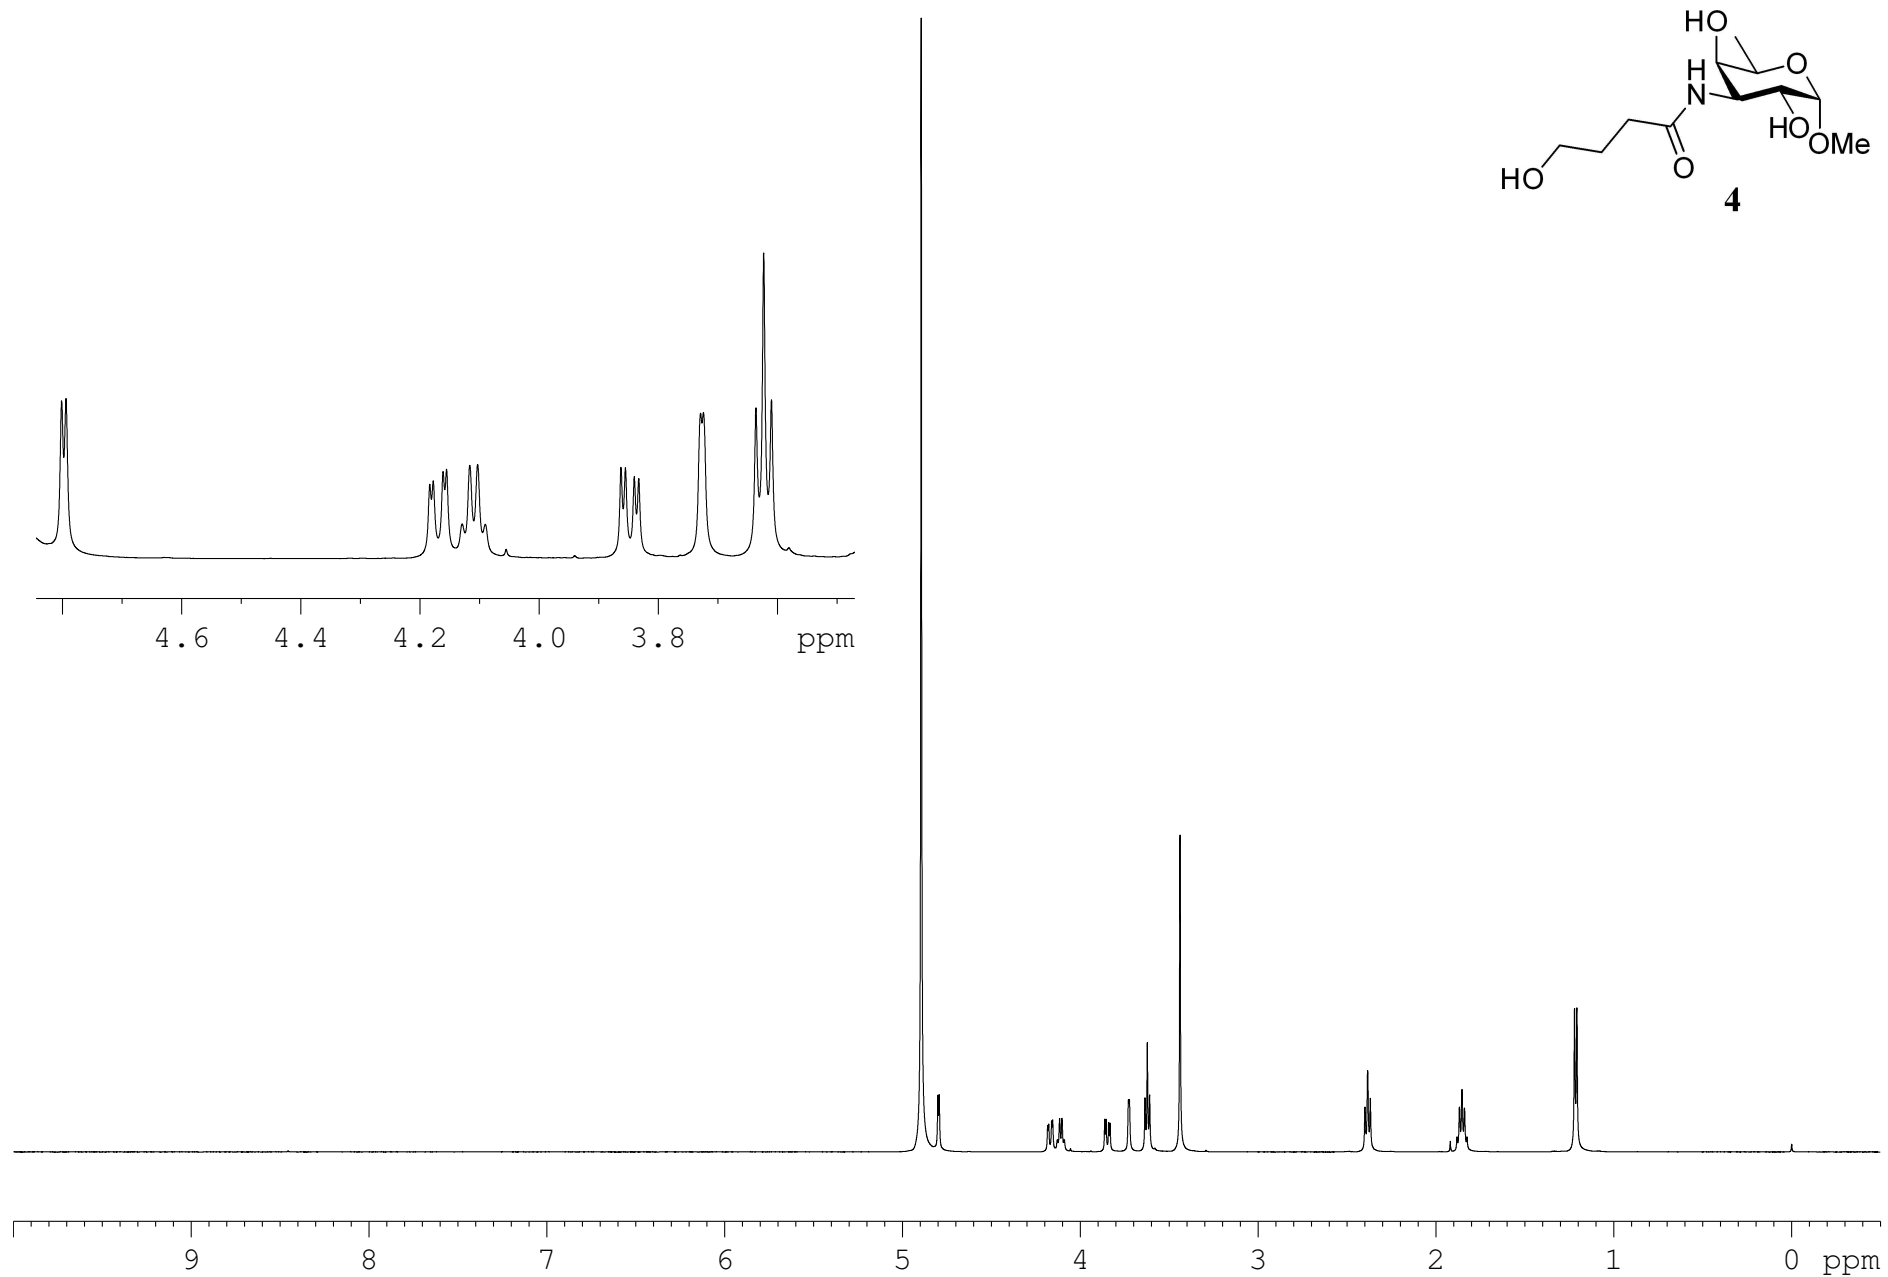

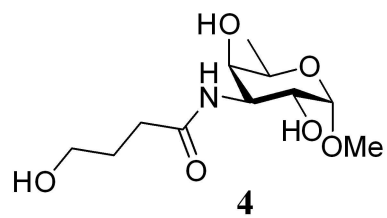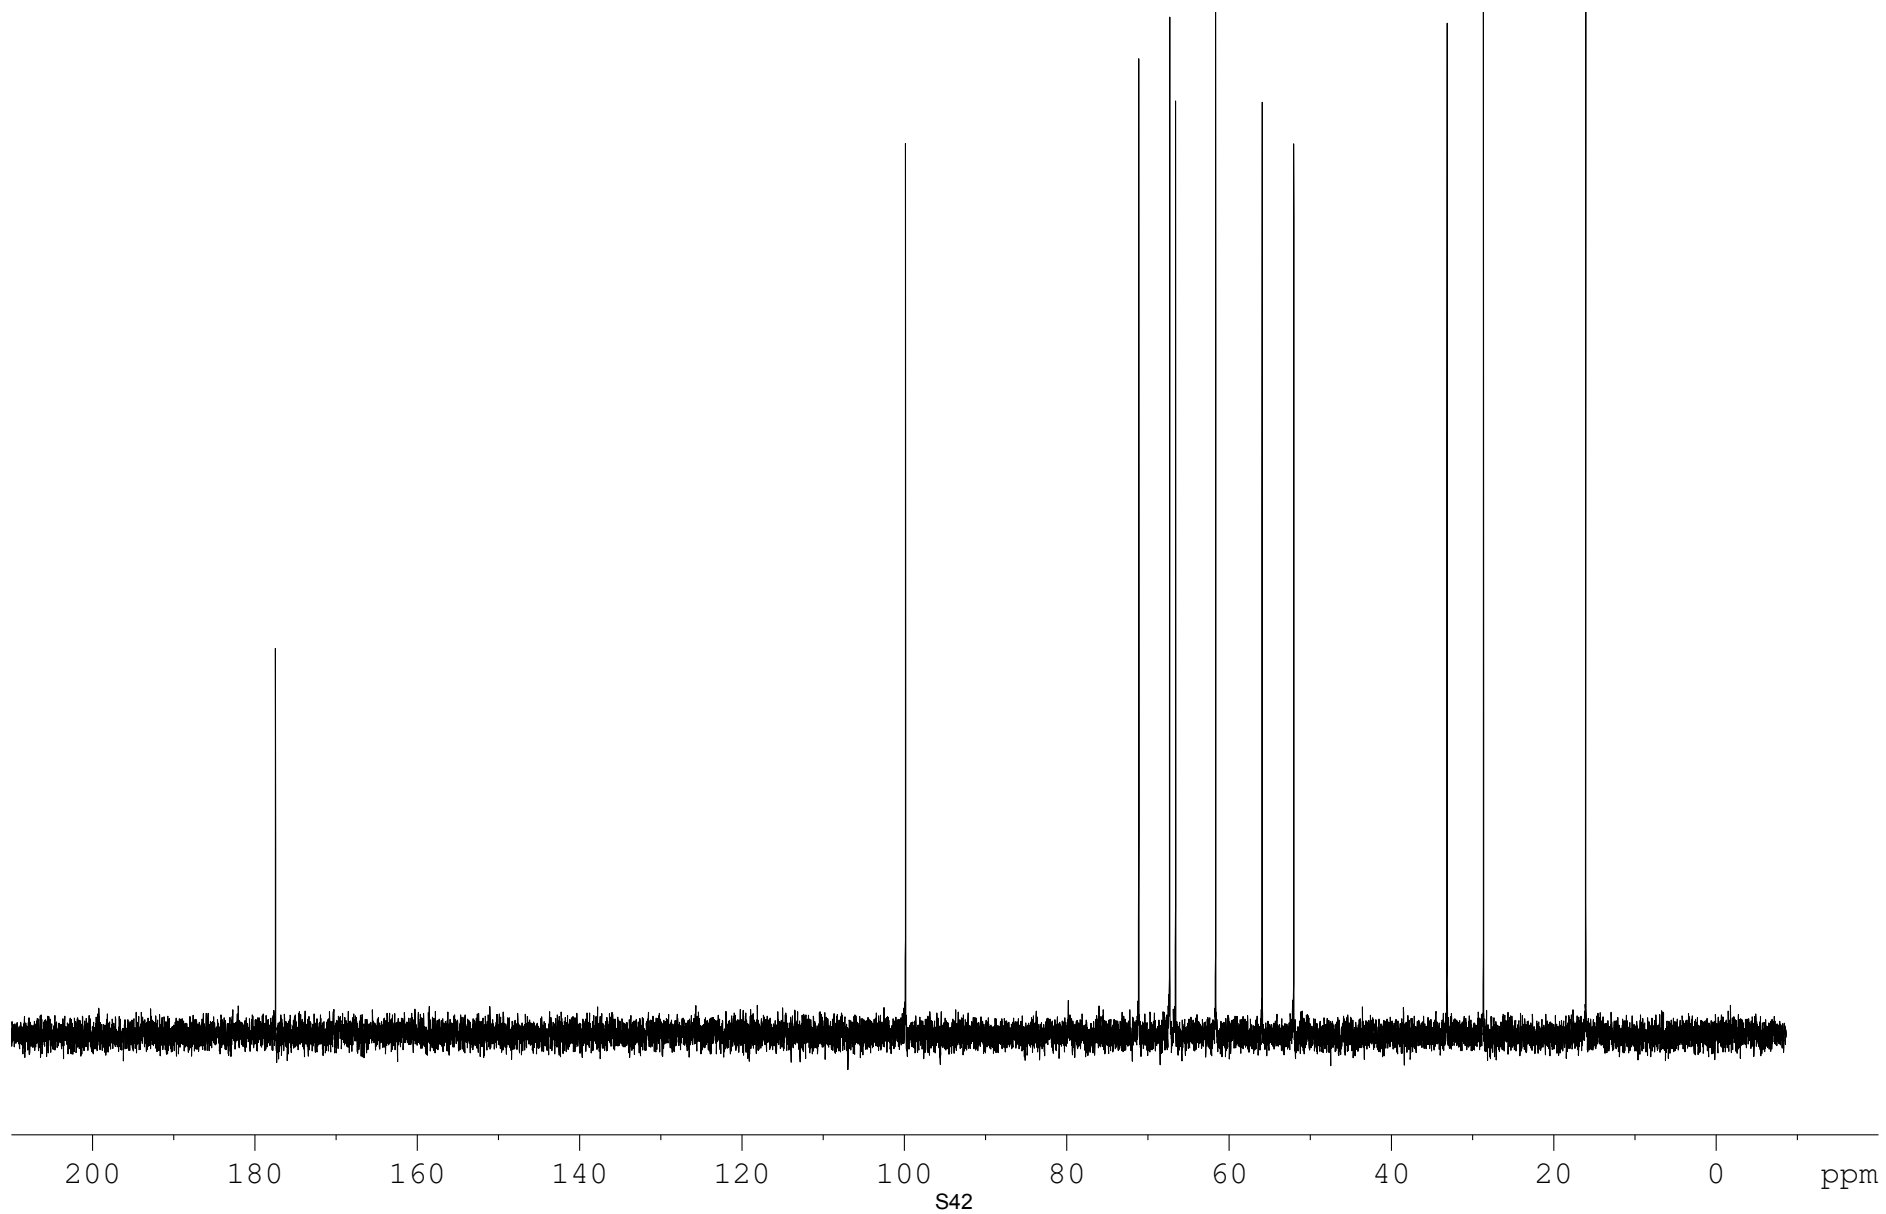

Supplement: c3ra45092a.pdf [file c3ra45092a.pdf]
